# Supplementary material for: Drug combinations proposed by machine learning on genes/proteins to improve the efficacy of Tecovirimat in the treatment of Monkeypox: A Systematic Review and Network Meta-analysis
Source: bioRxiv or medRxiv preprint supplement (doi:10.1101/2023.04.23.23289008), 2023-04-25

gene\_name: BIK

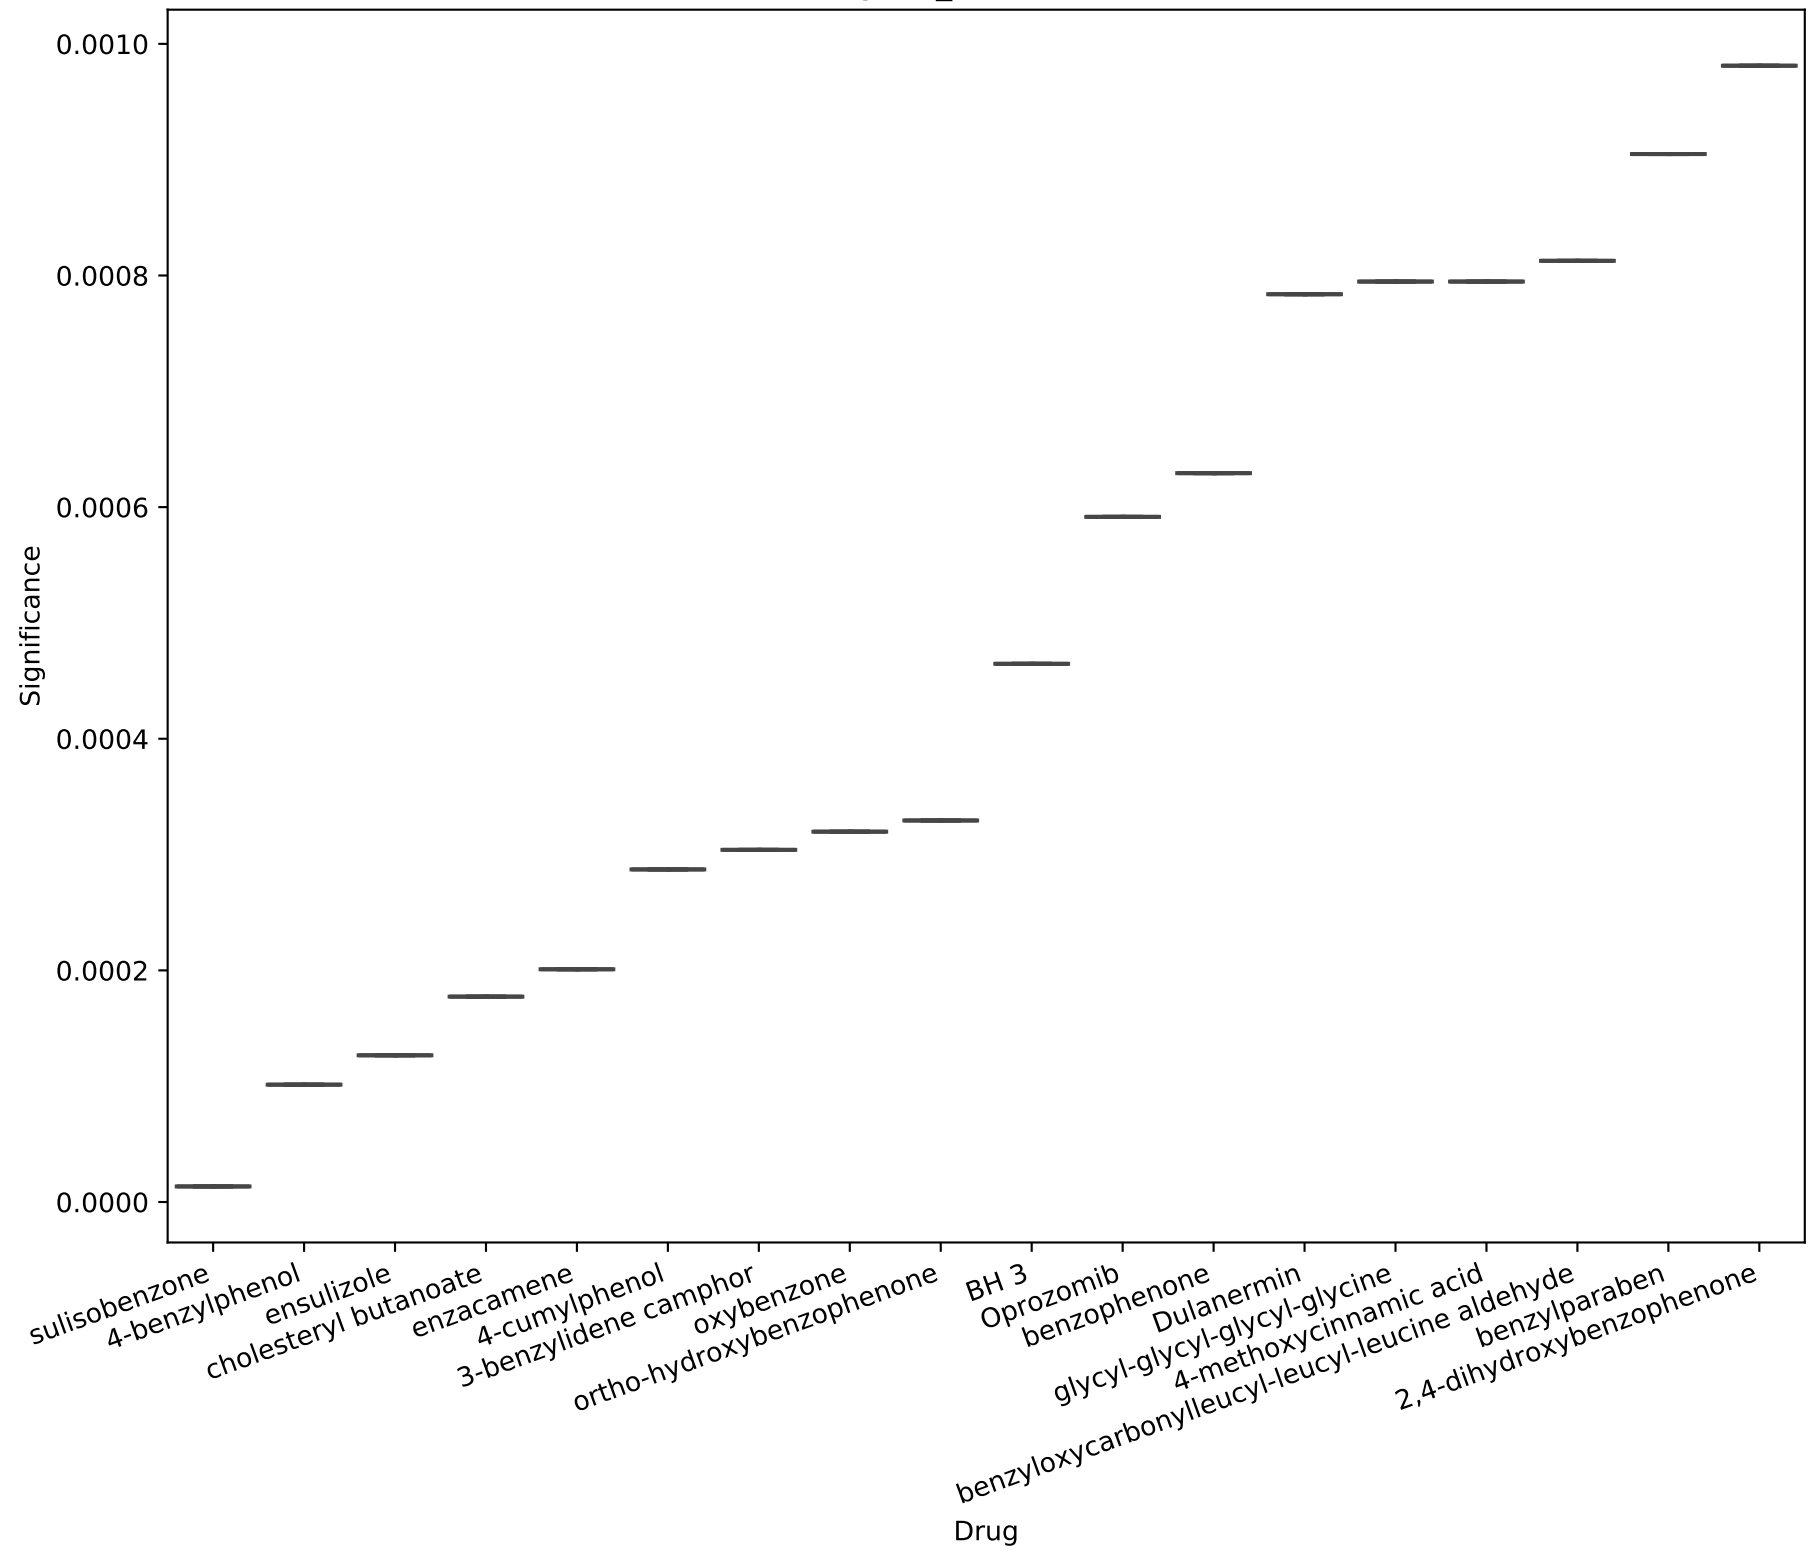

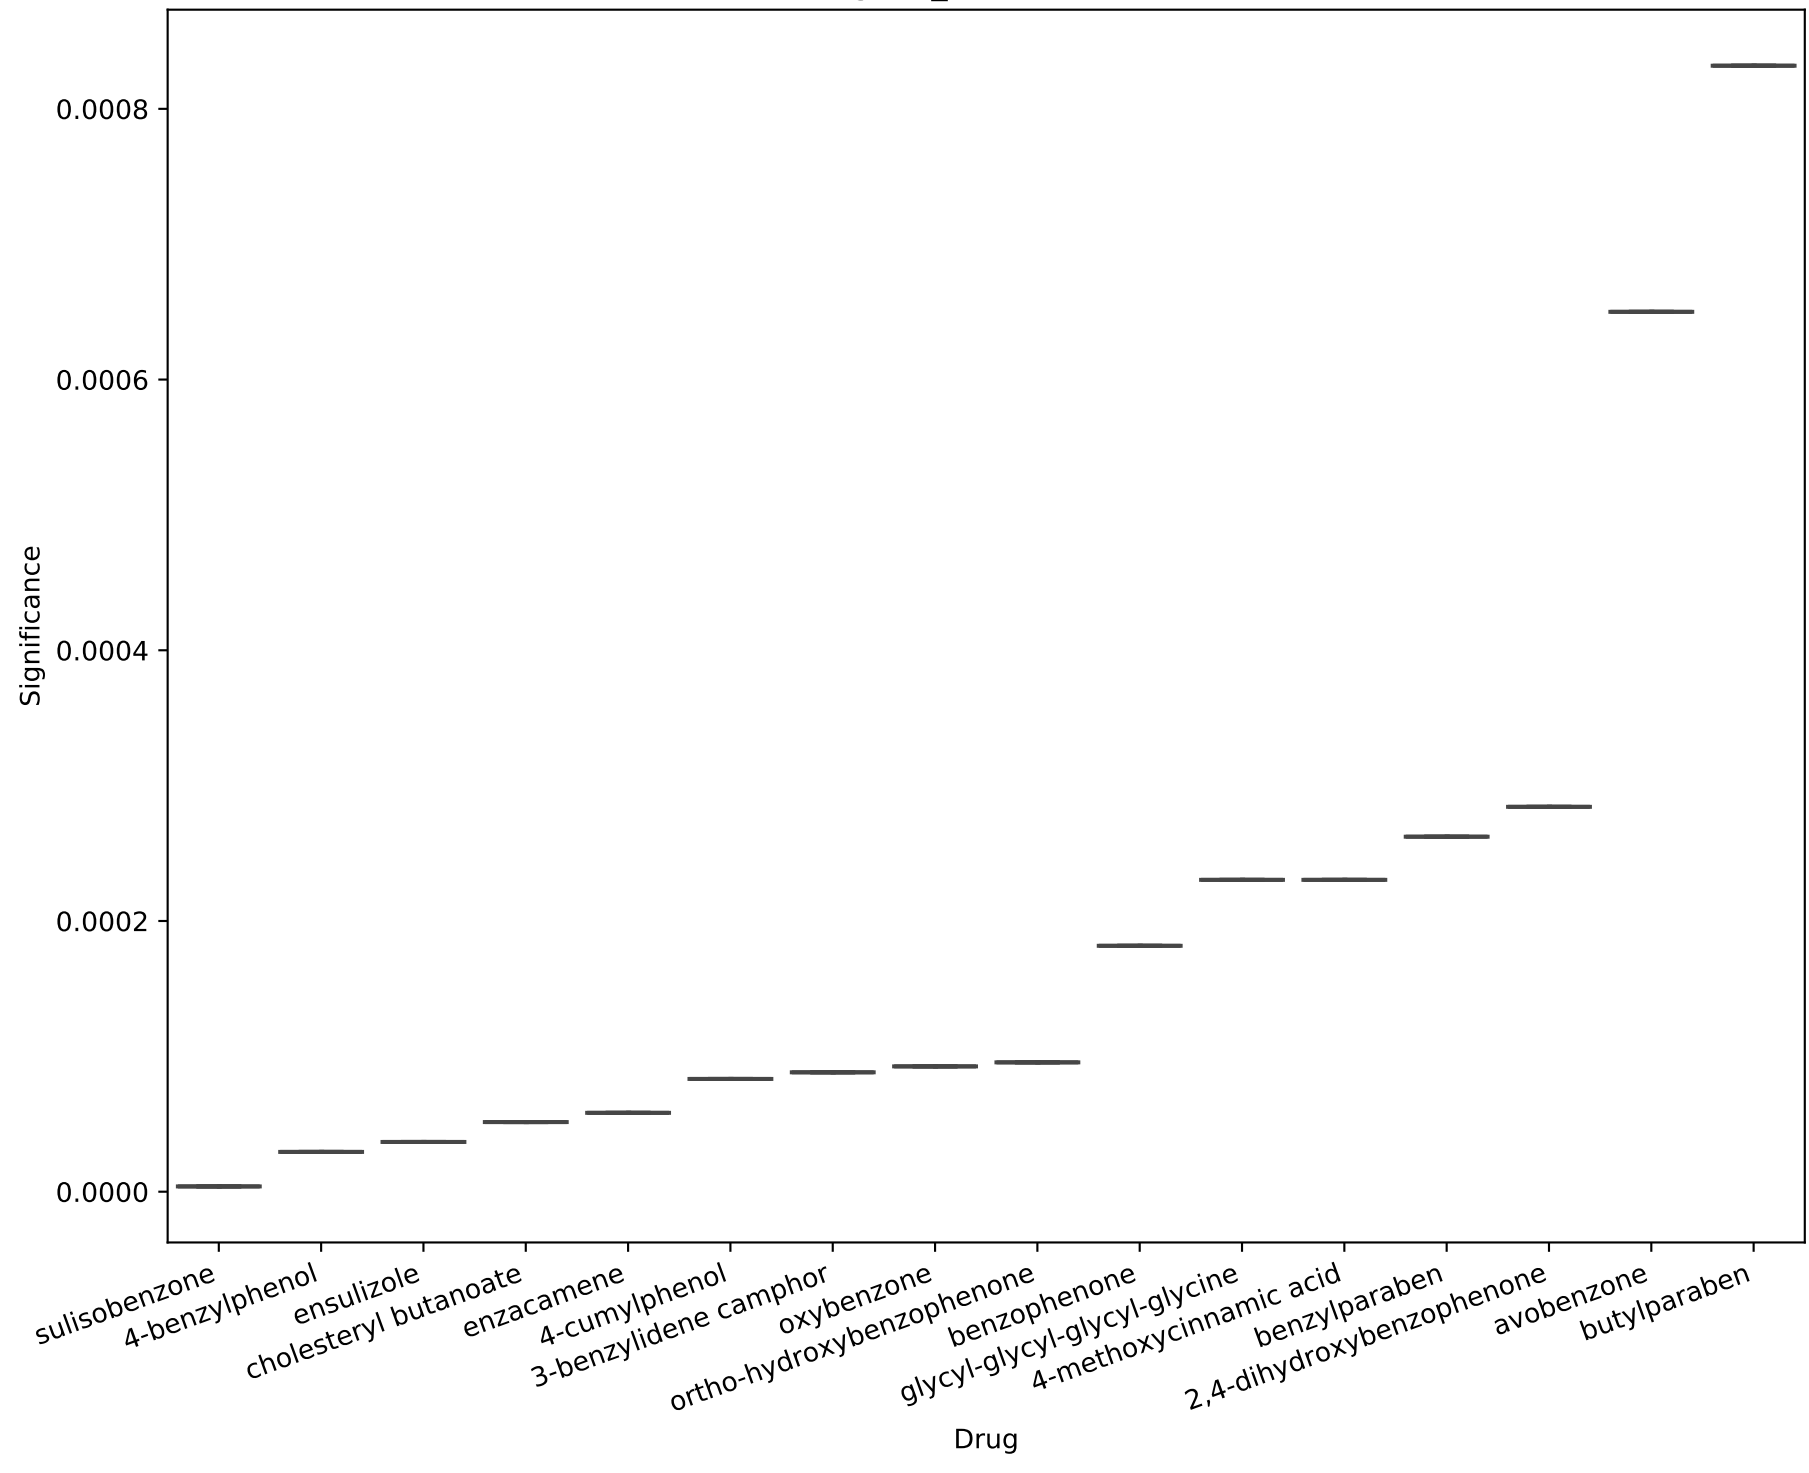

gene\_name: C6

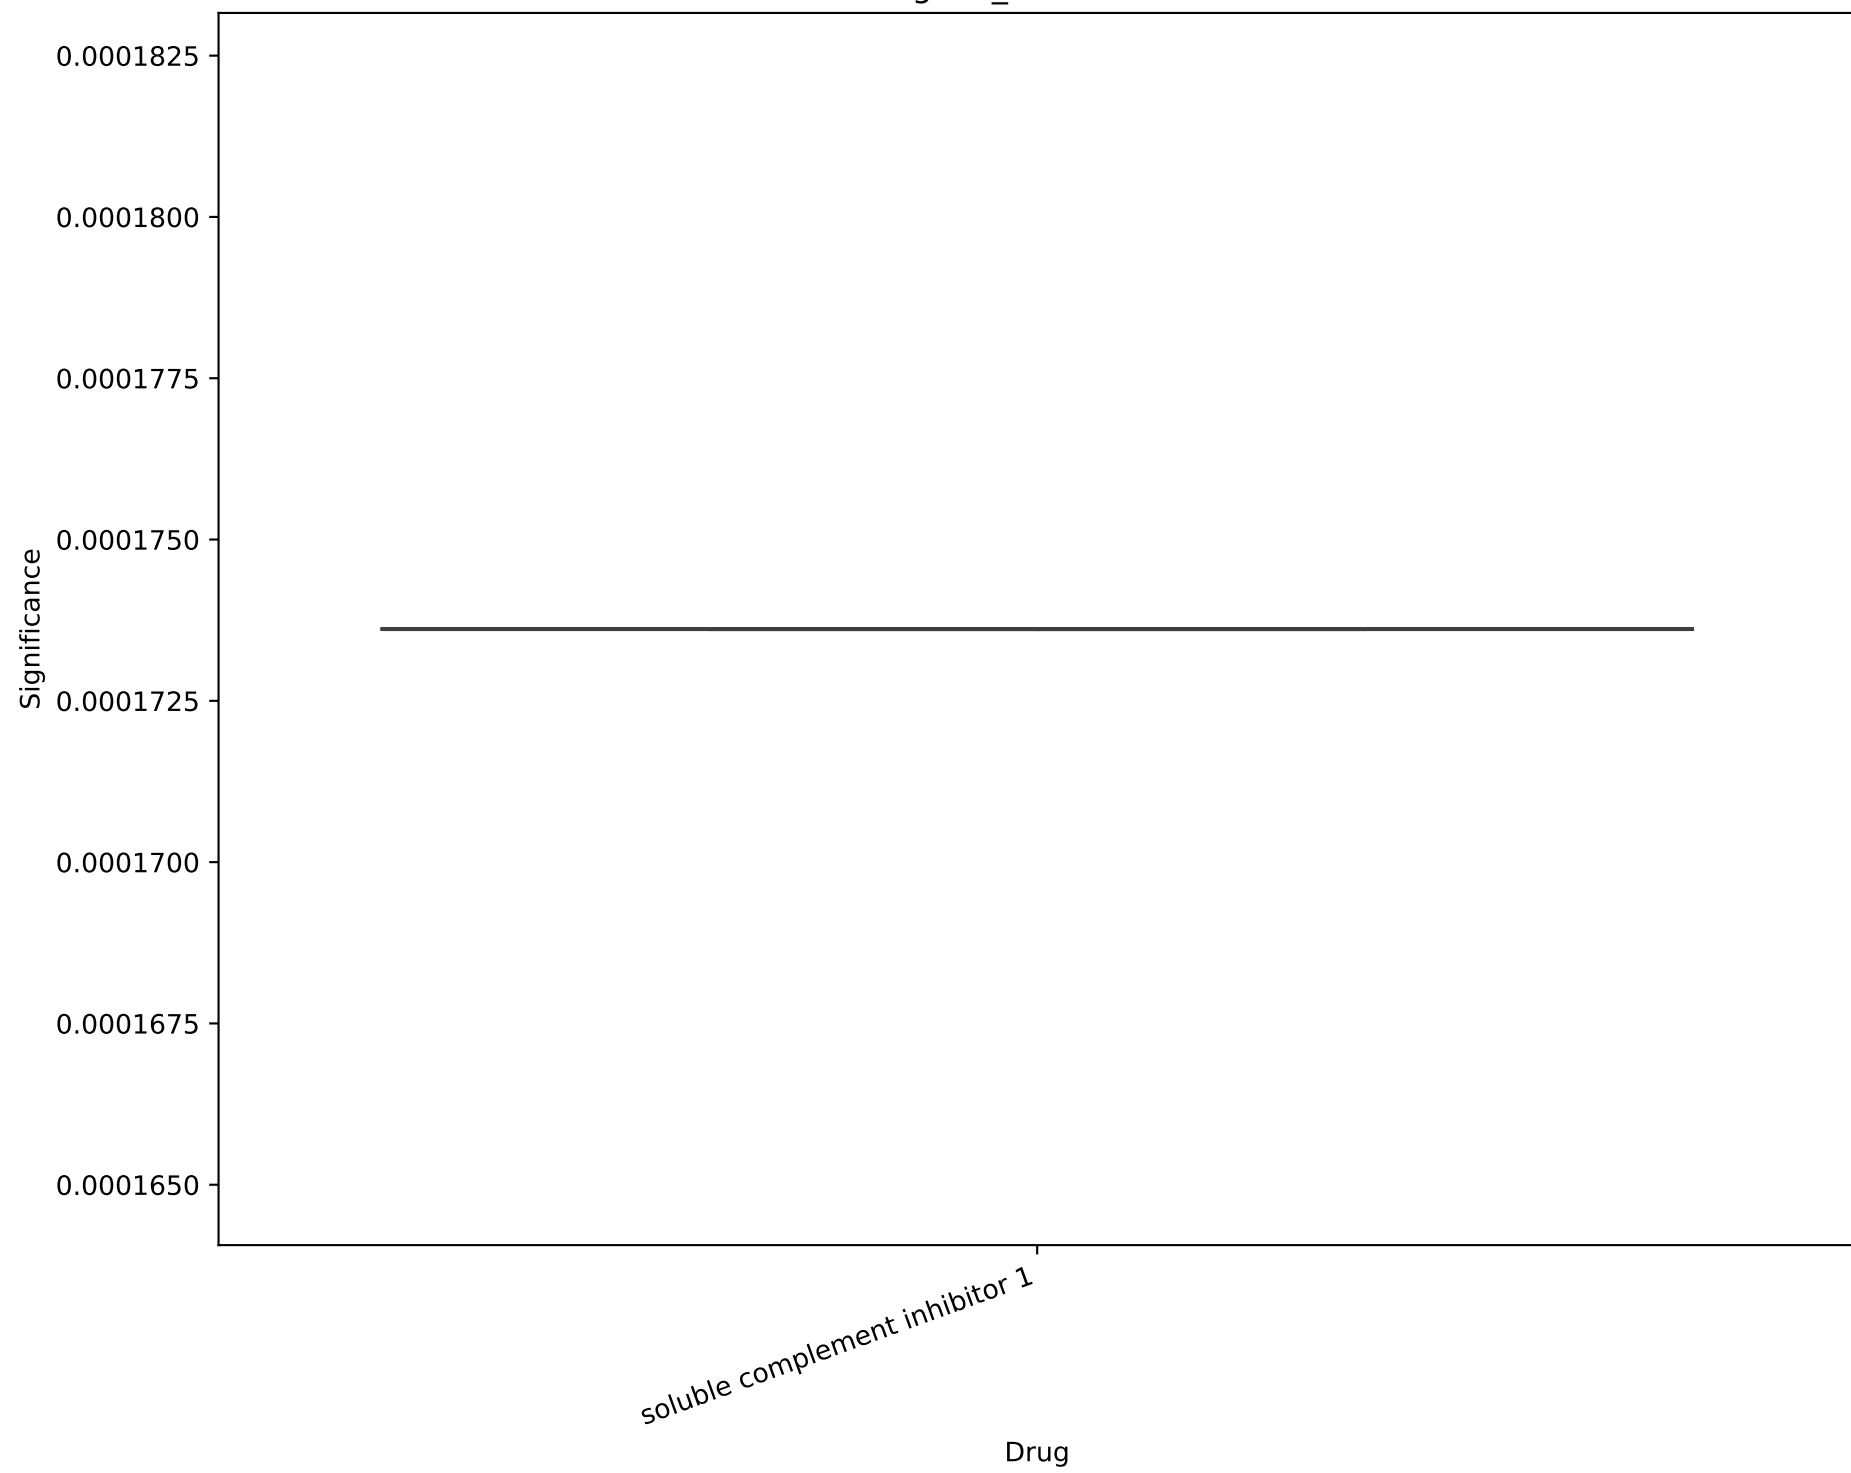

gene\_name: C8A

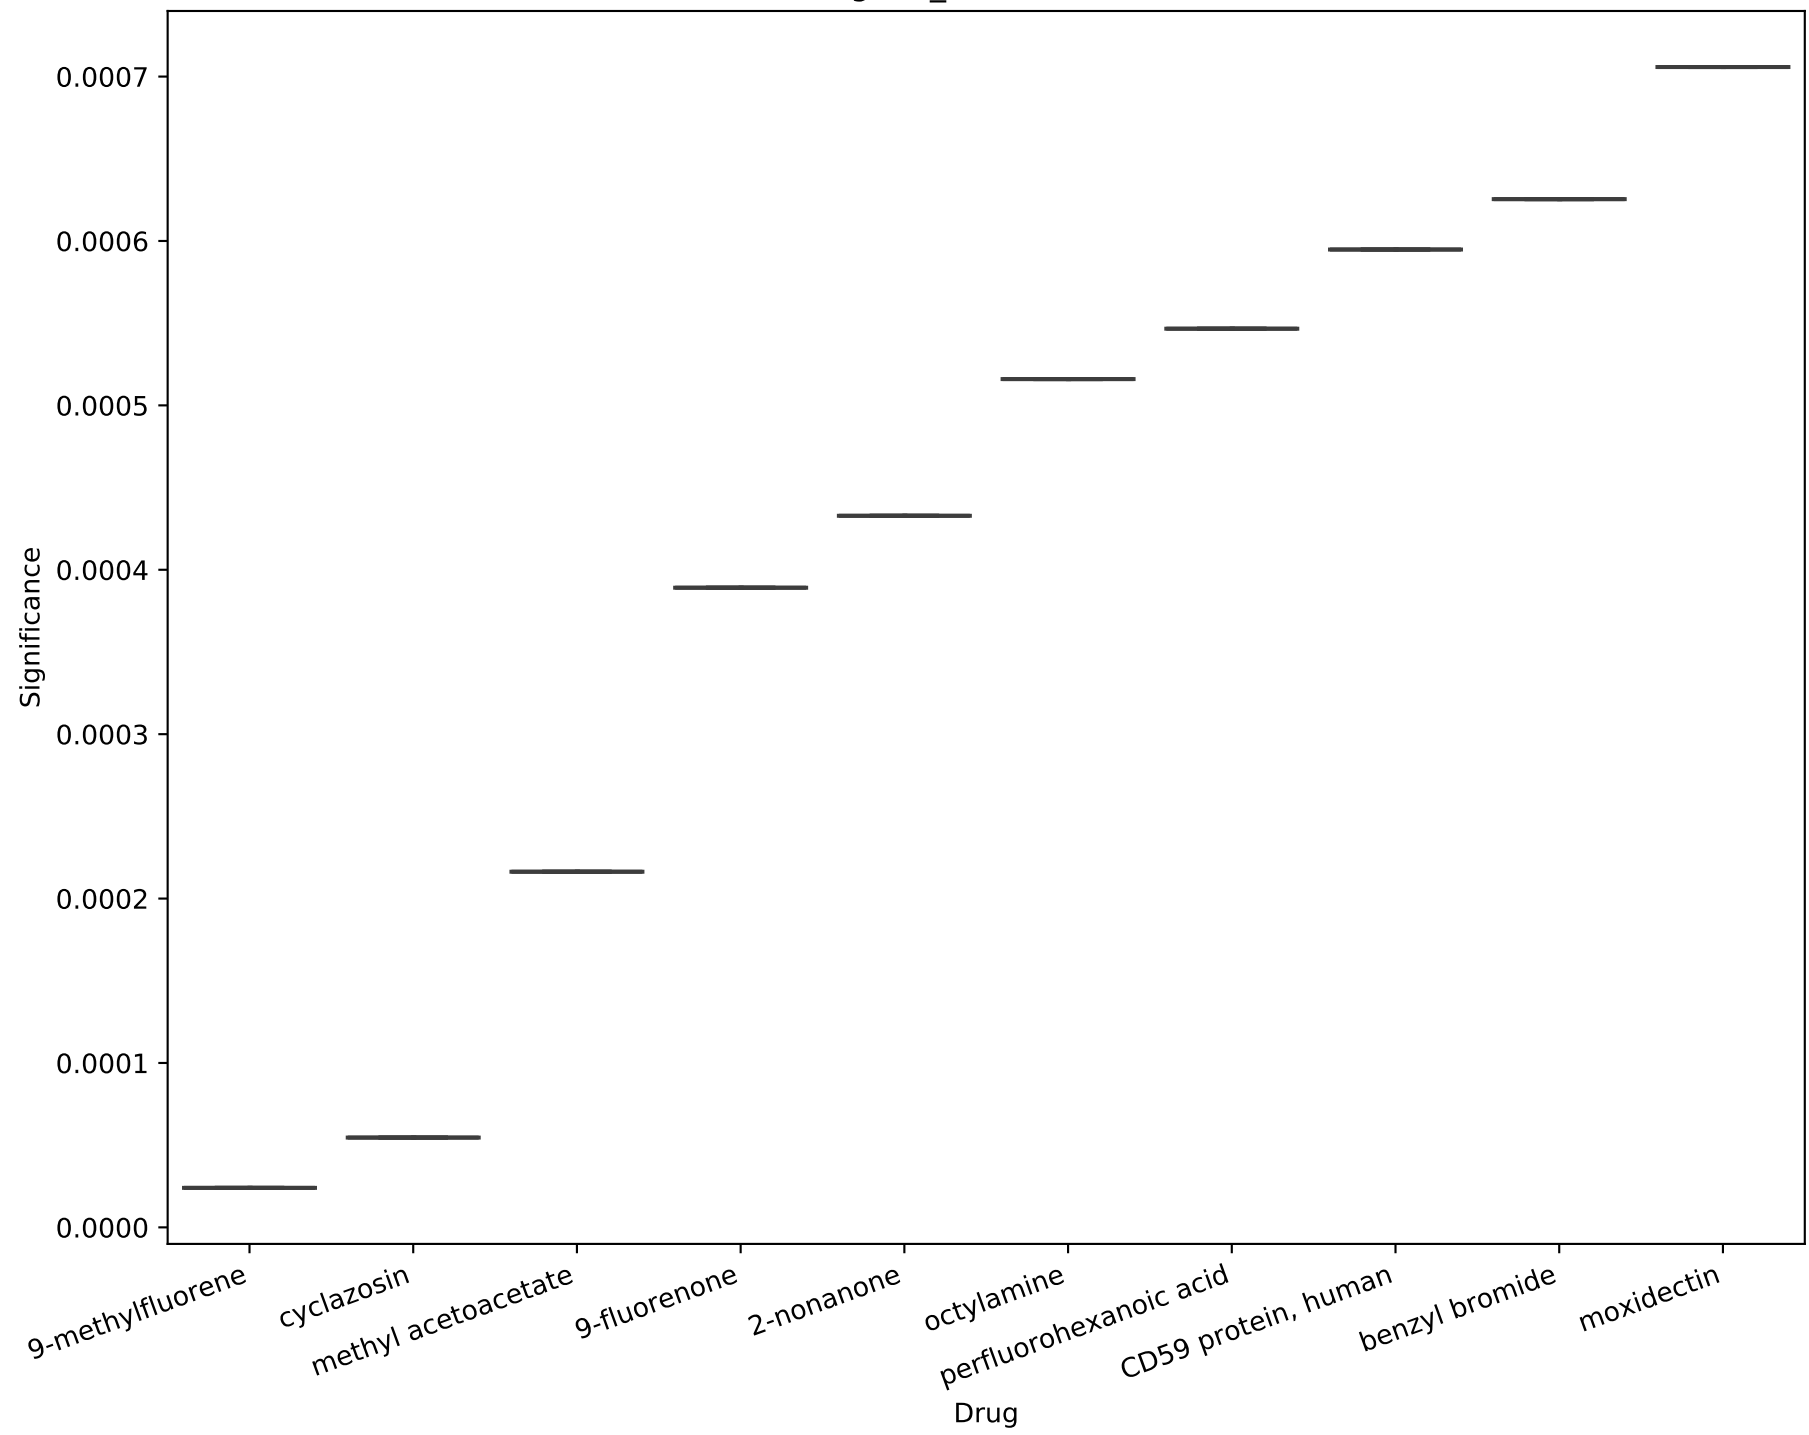

gene\_name: CCNH

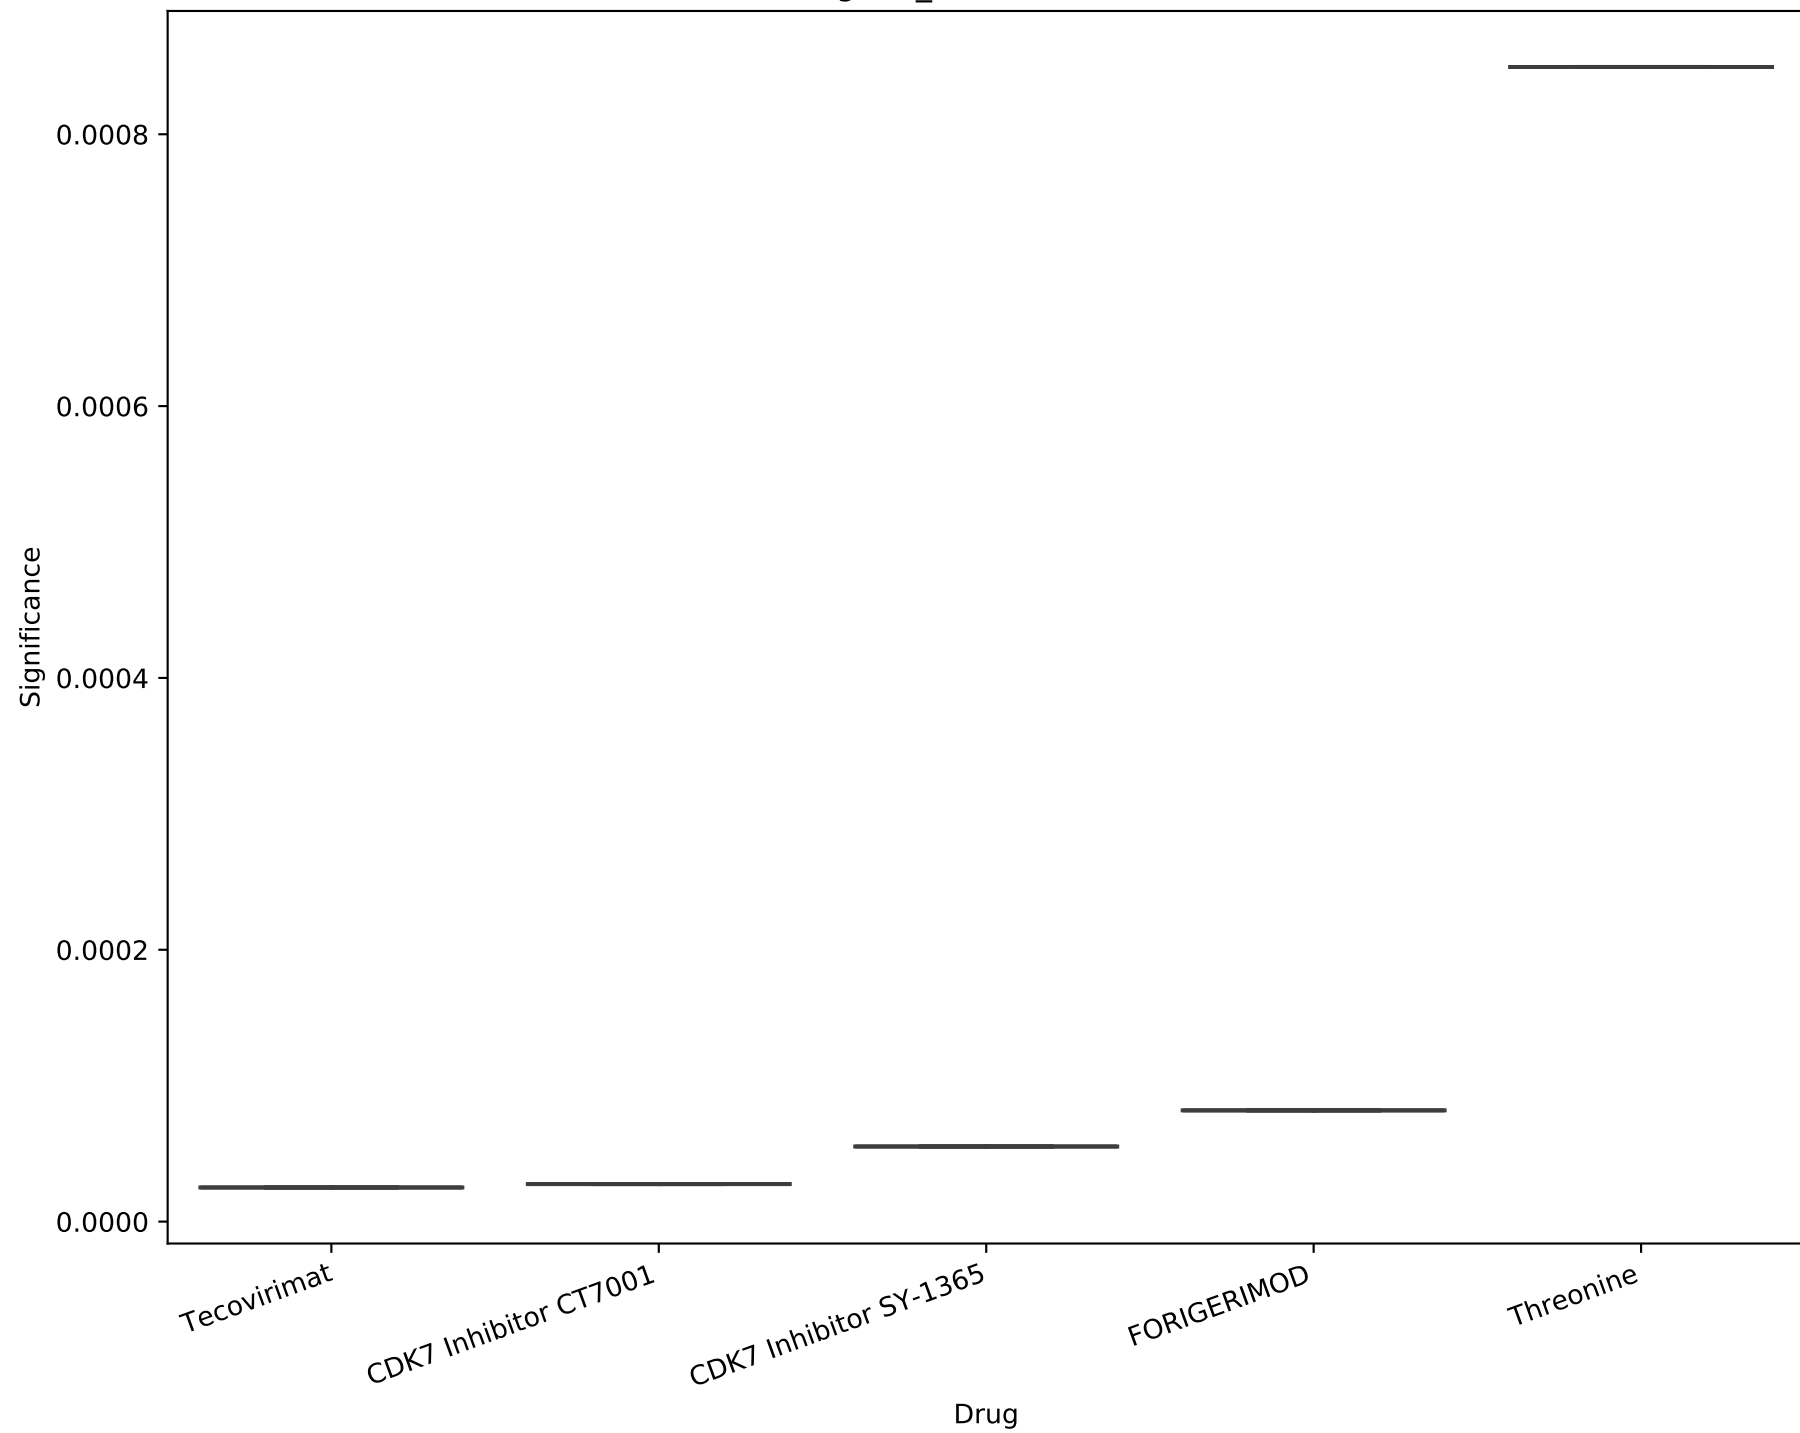

gene\_name: CD4

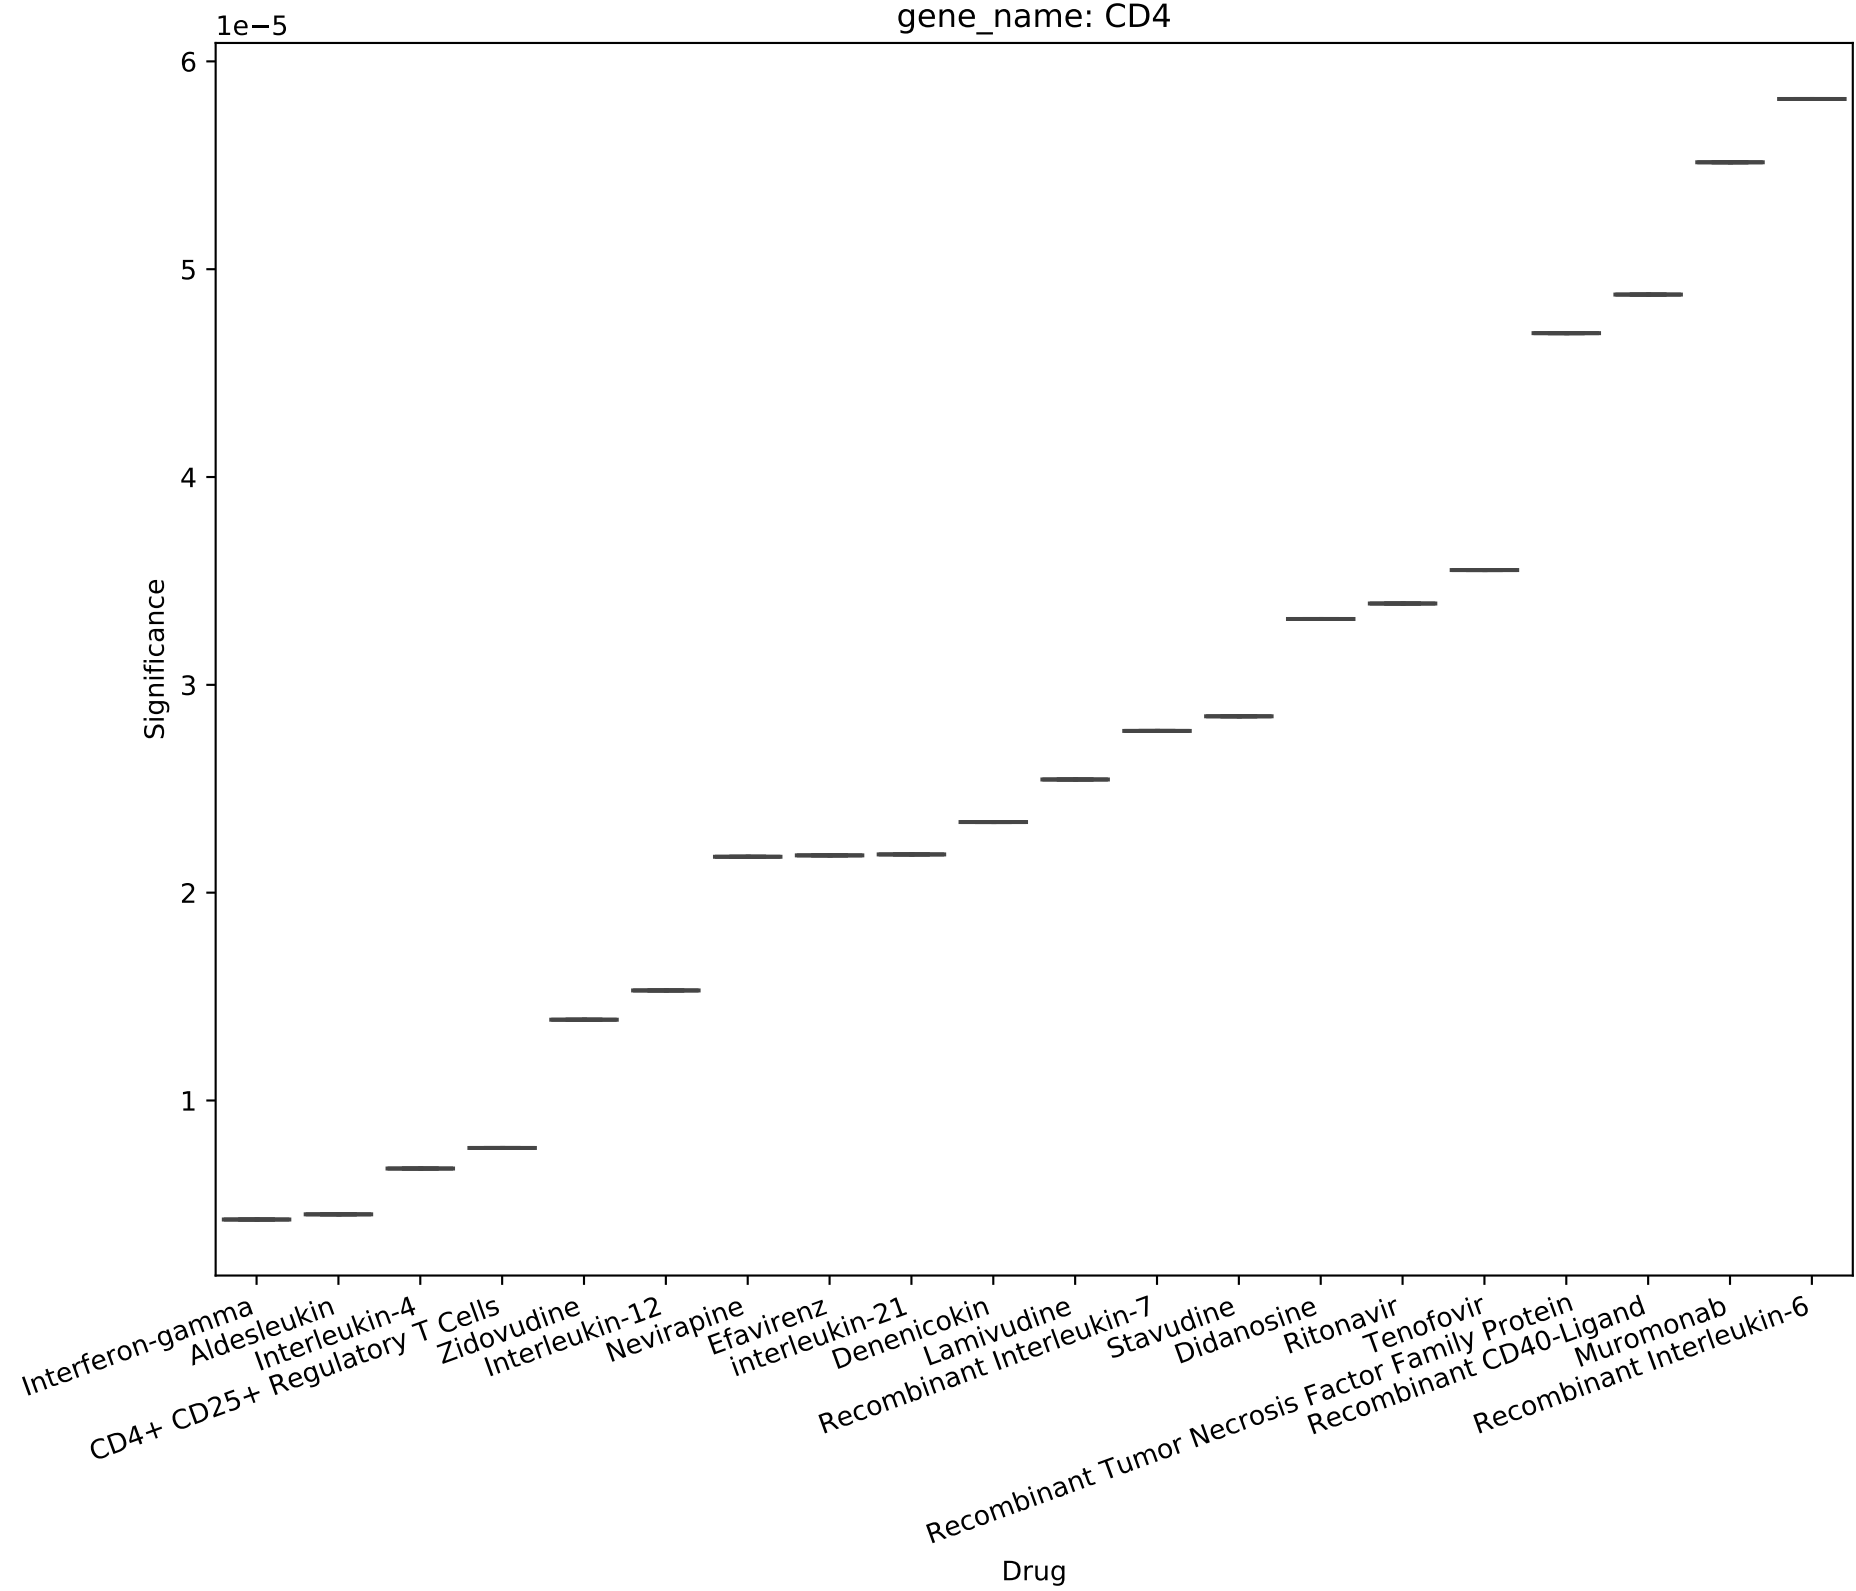

gene\_name: CNGB1

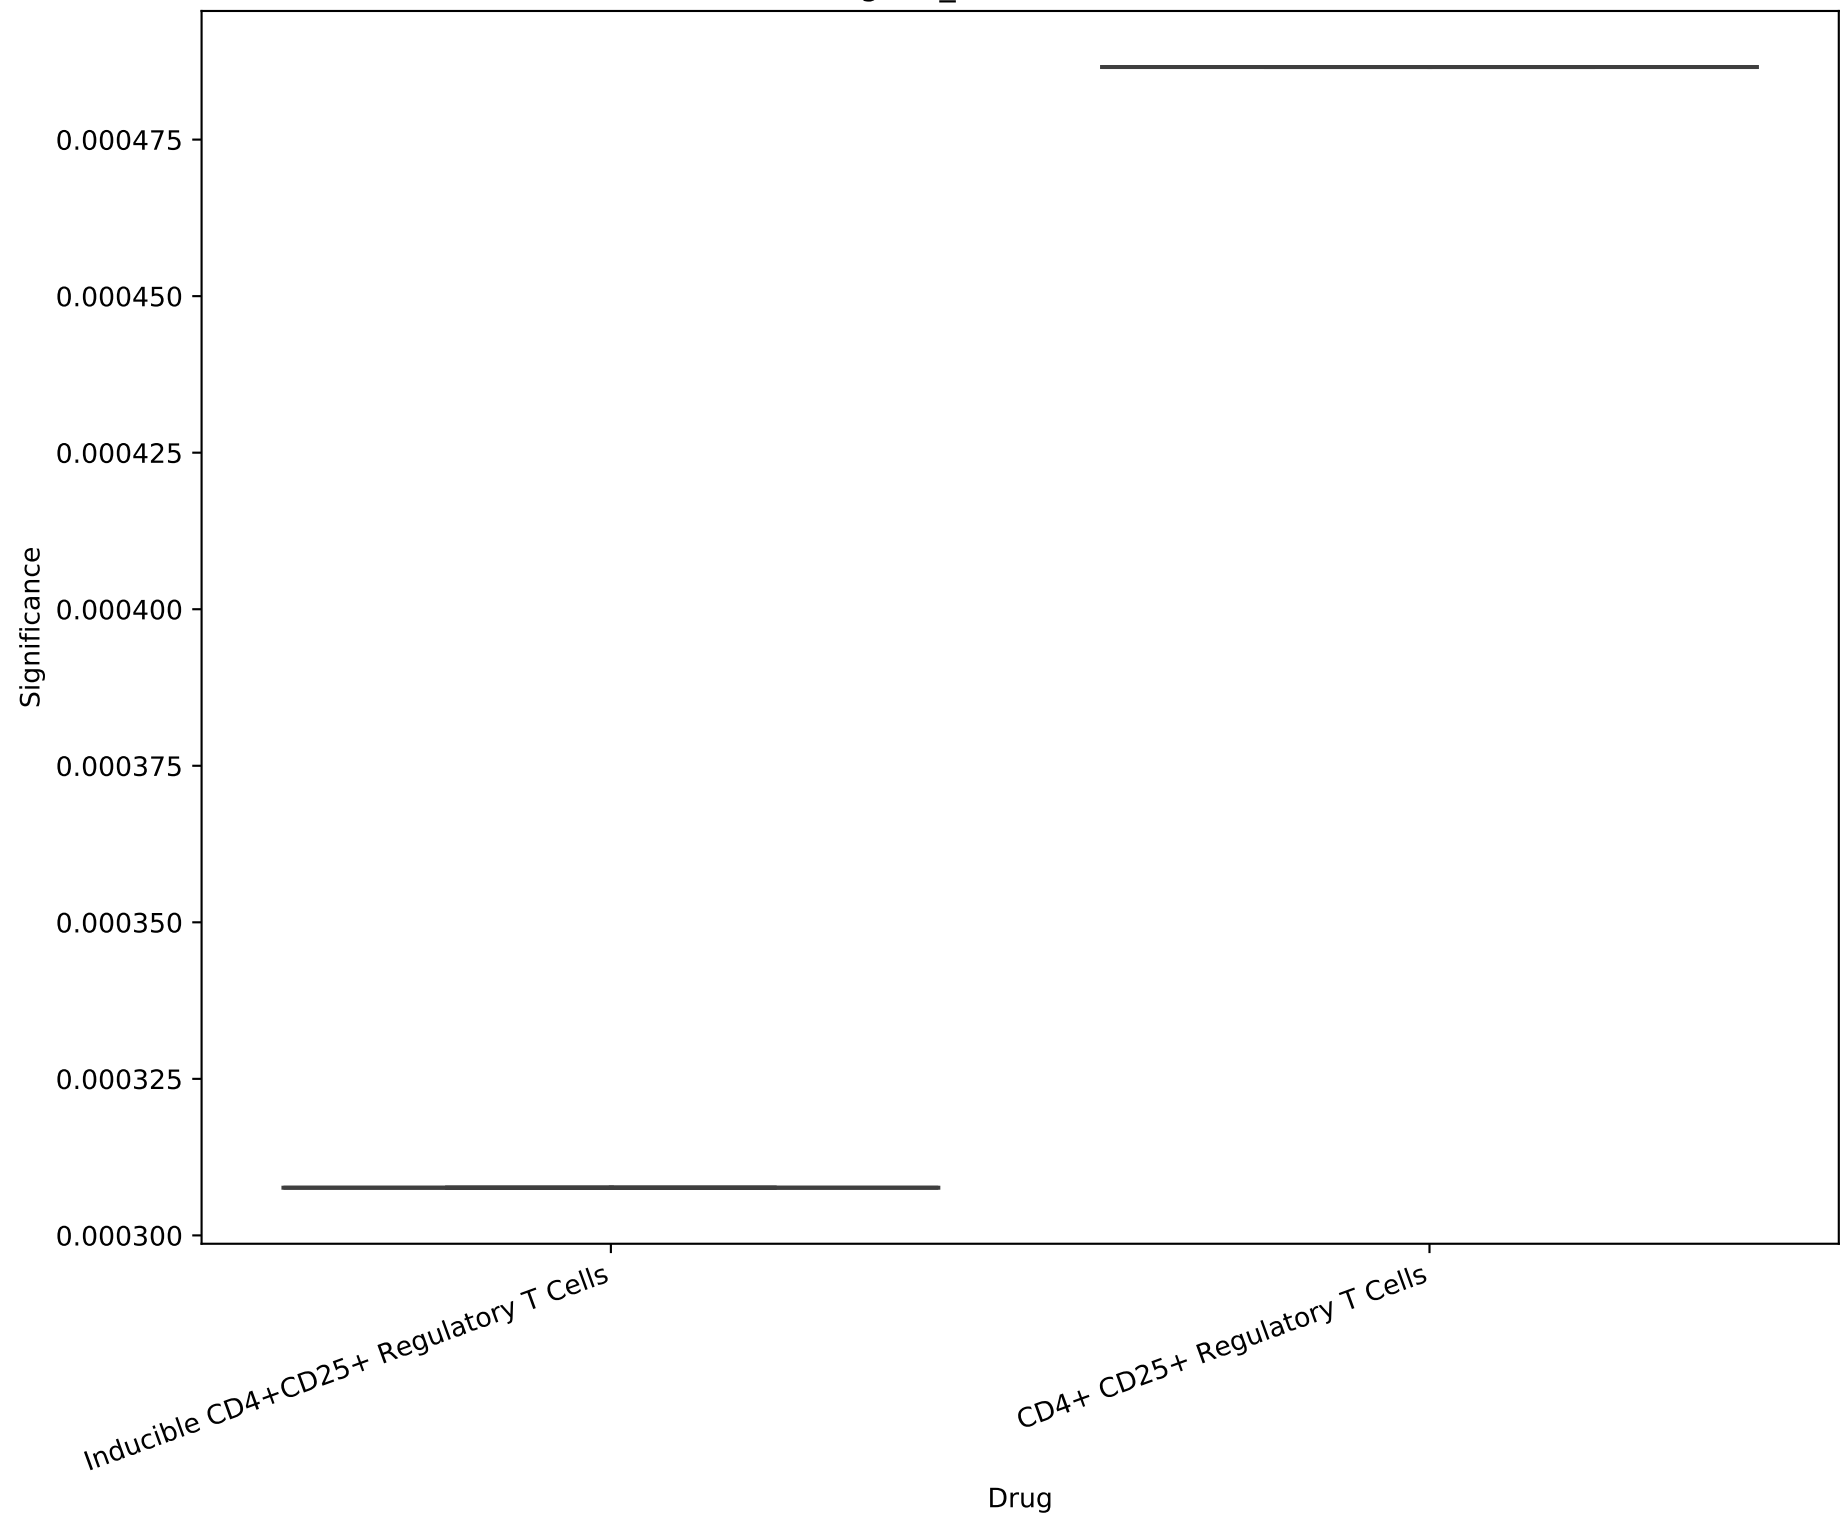

gene\_name: CTNNBIP1

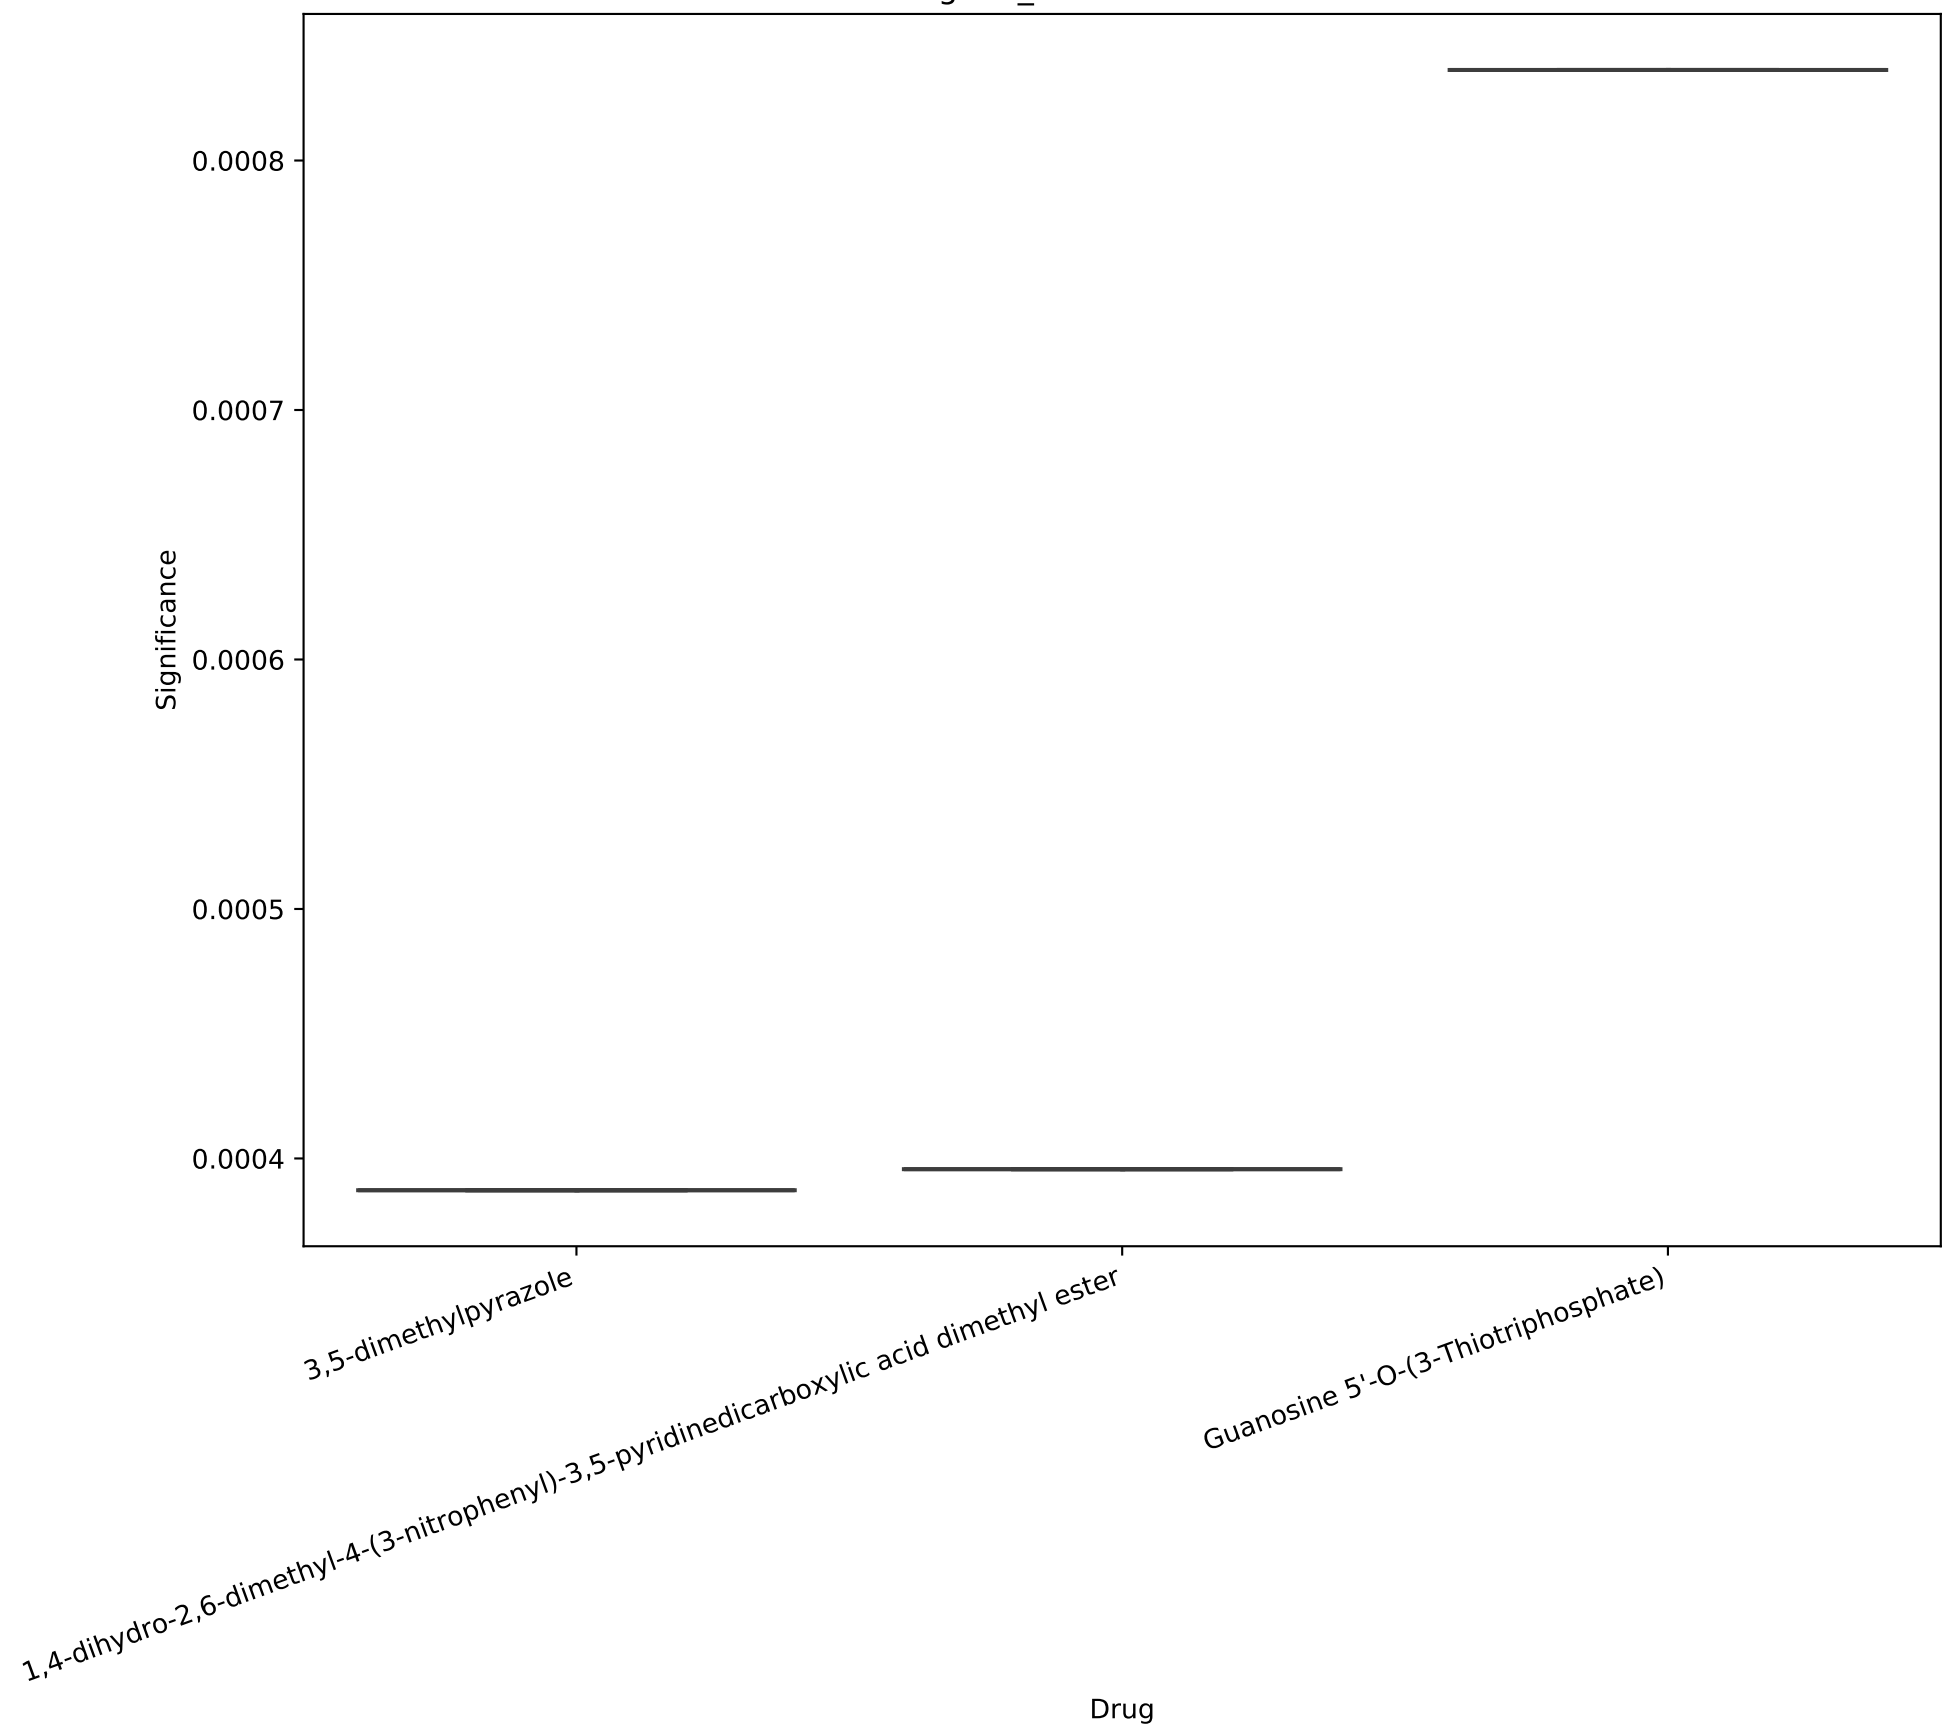



gene\_name: CYB5R3

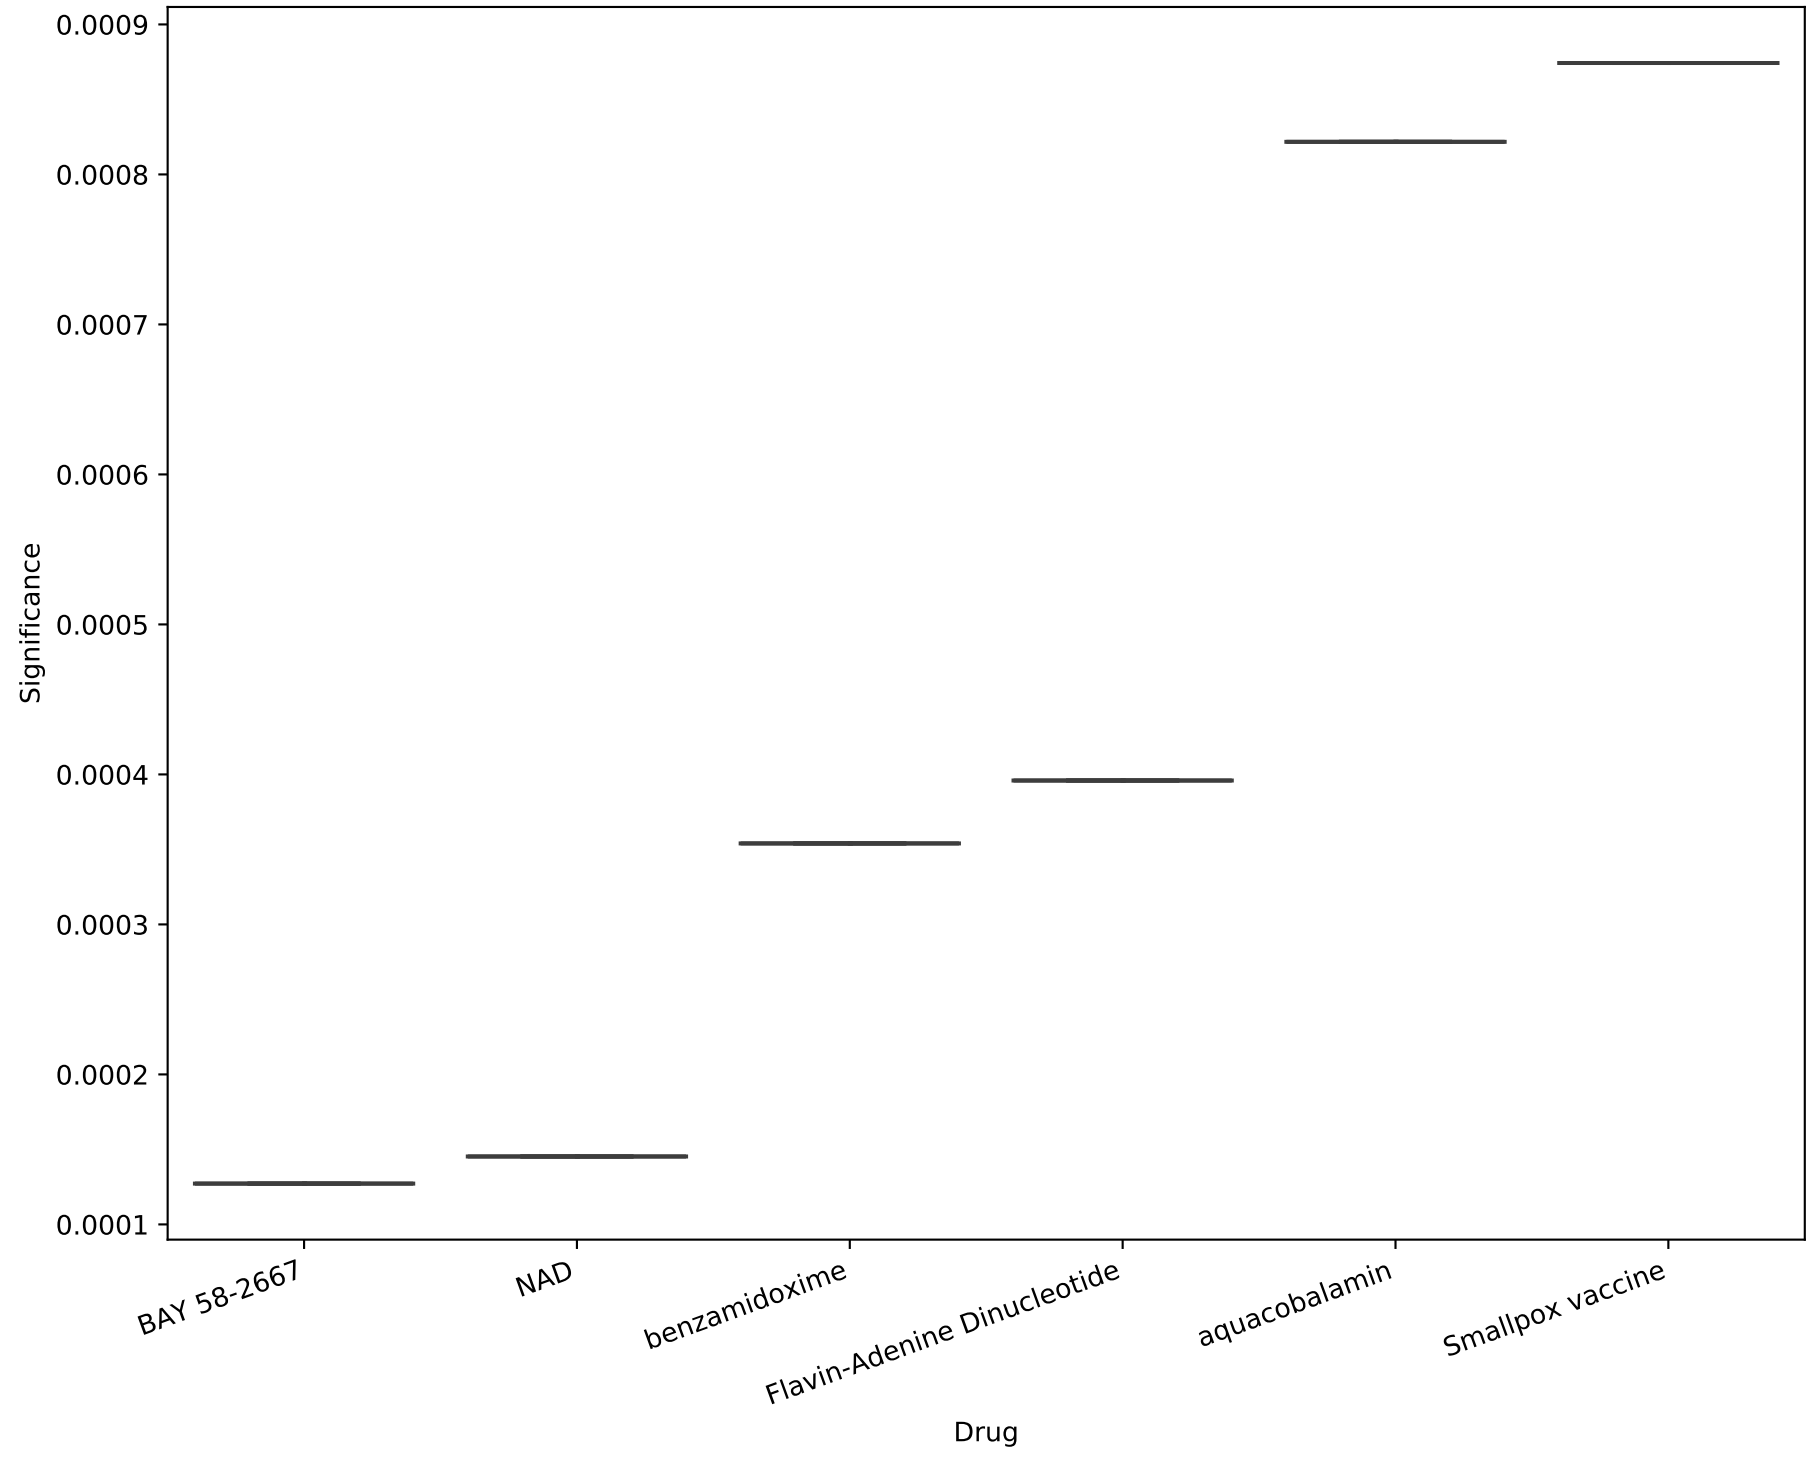

gene\_name: DPAGT1

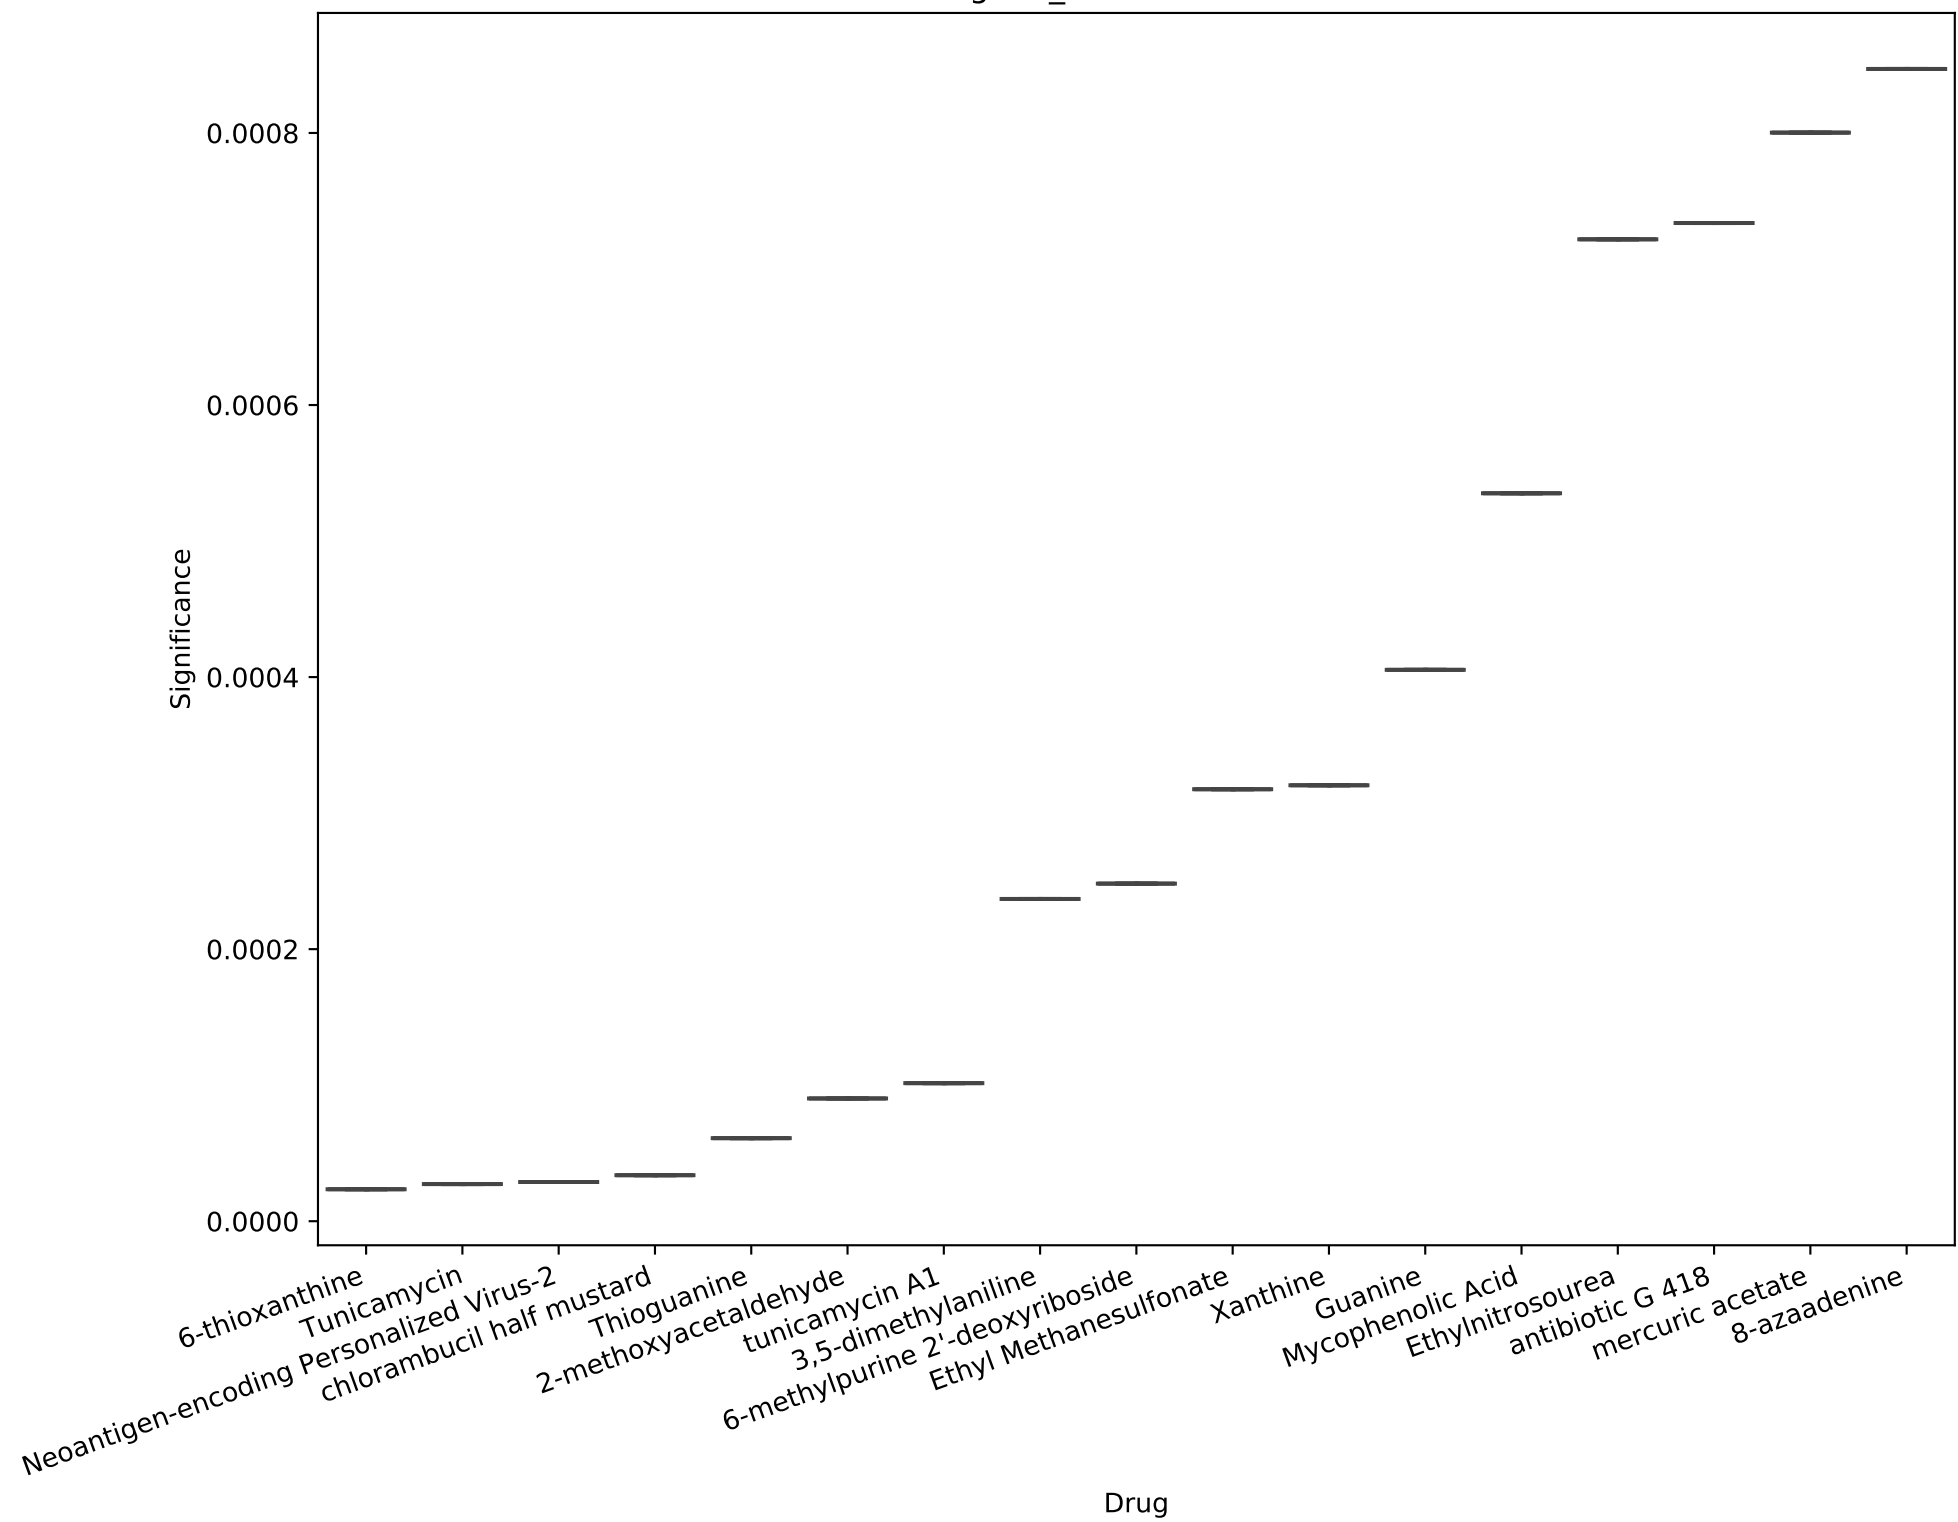

gene\_name: EIF2AK2

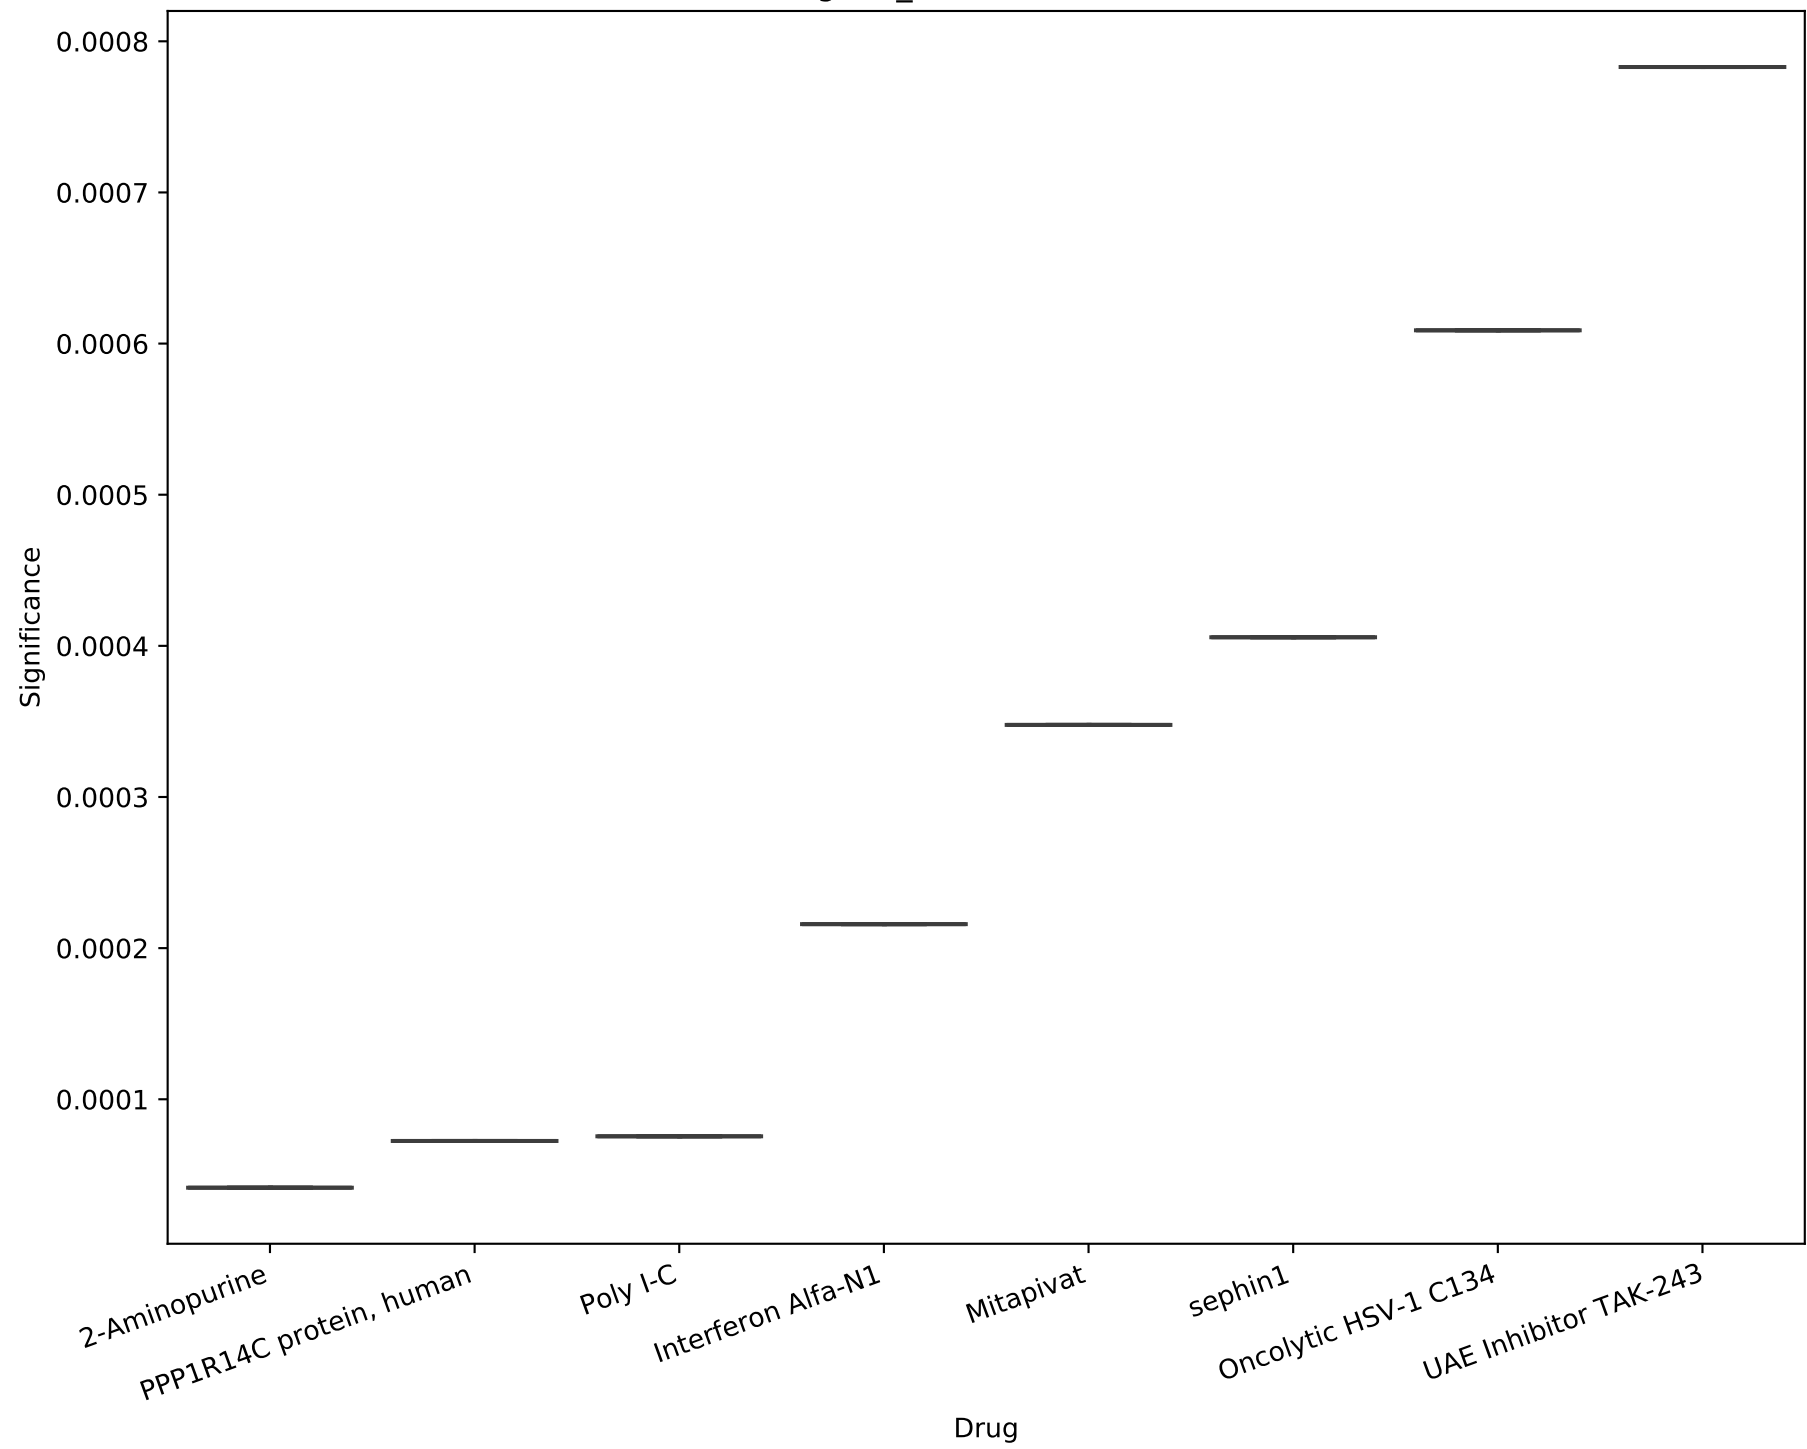

gene\_name: ERVW-1

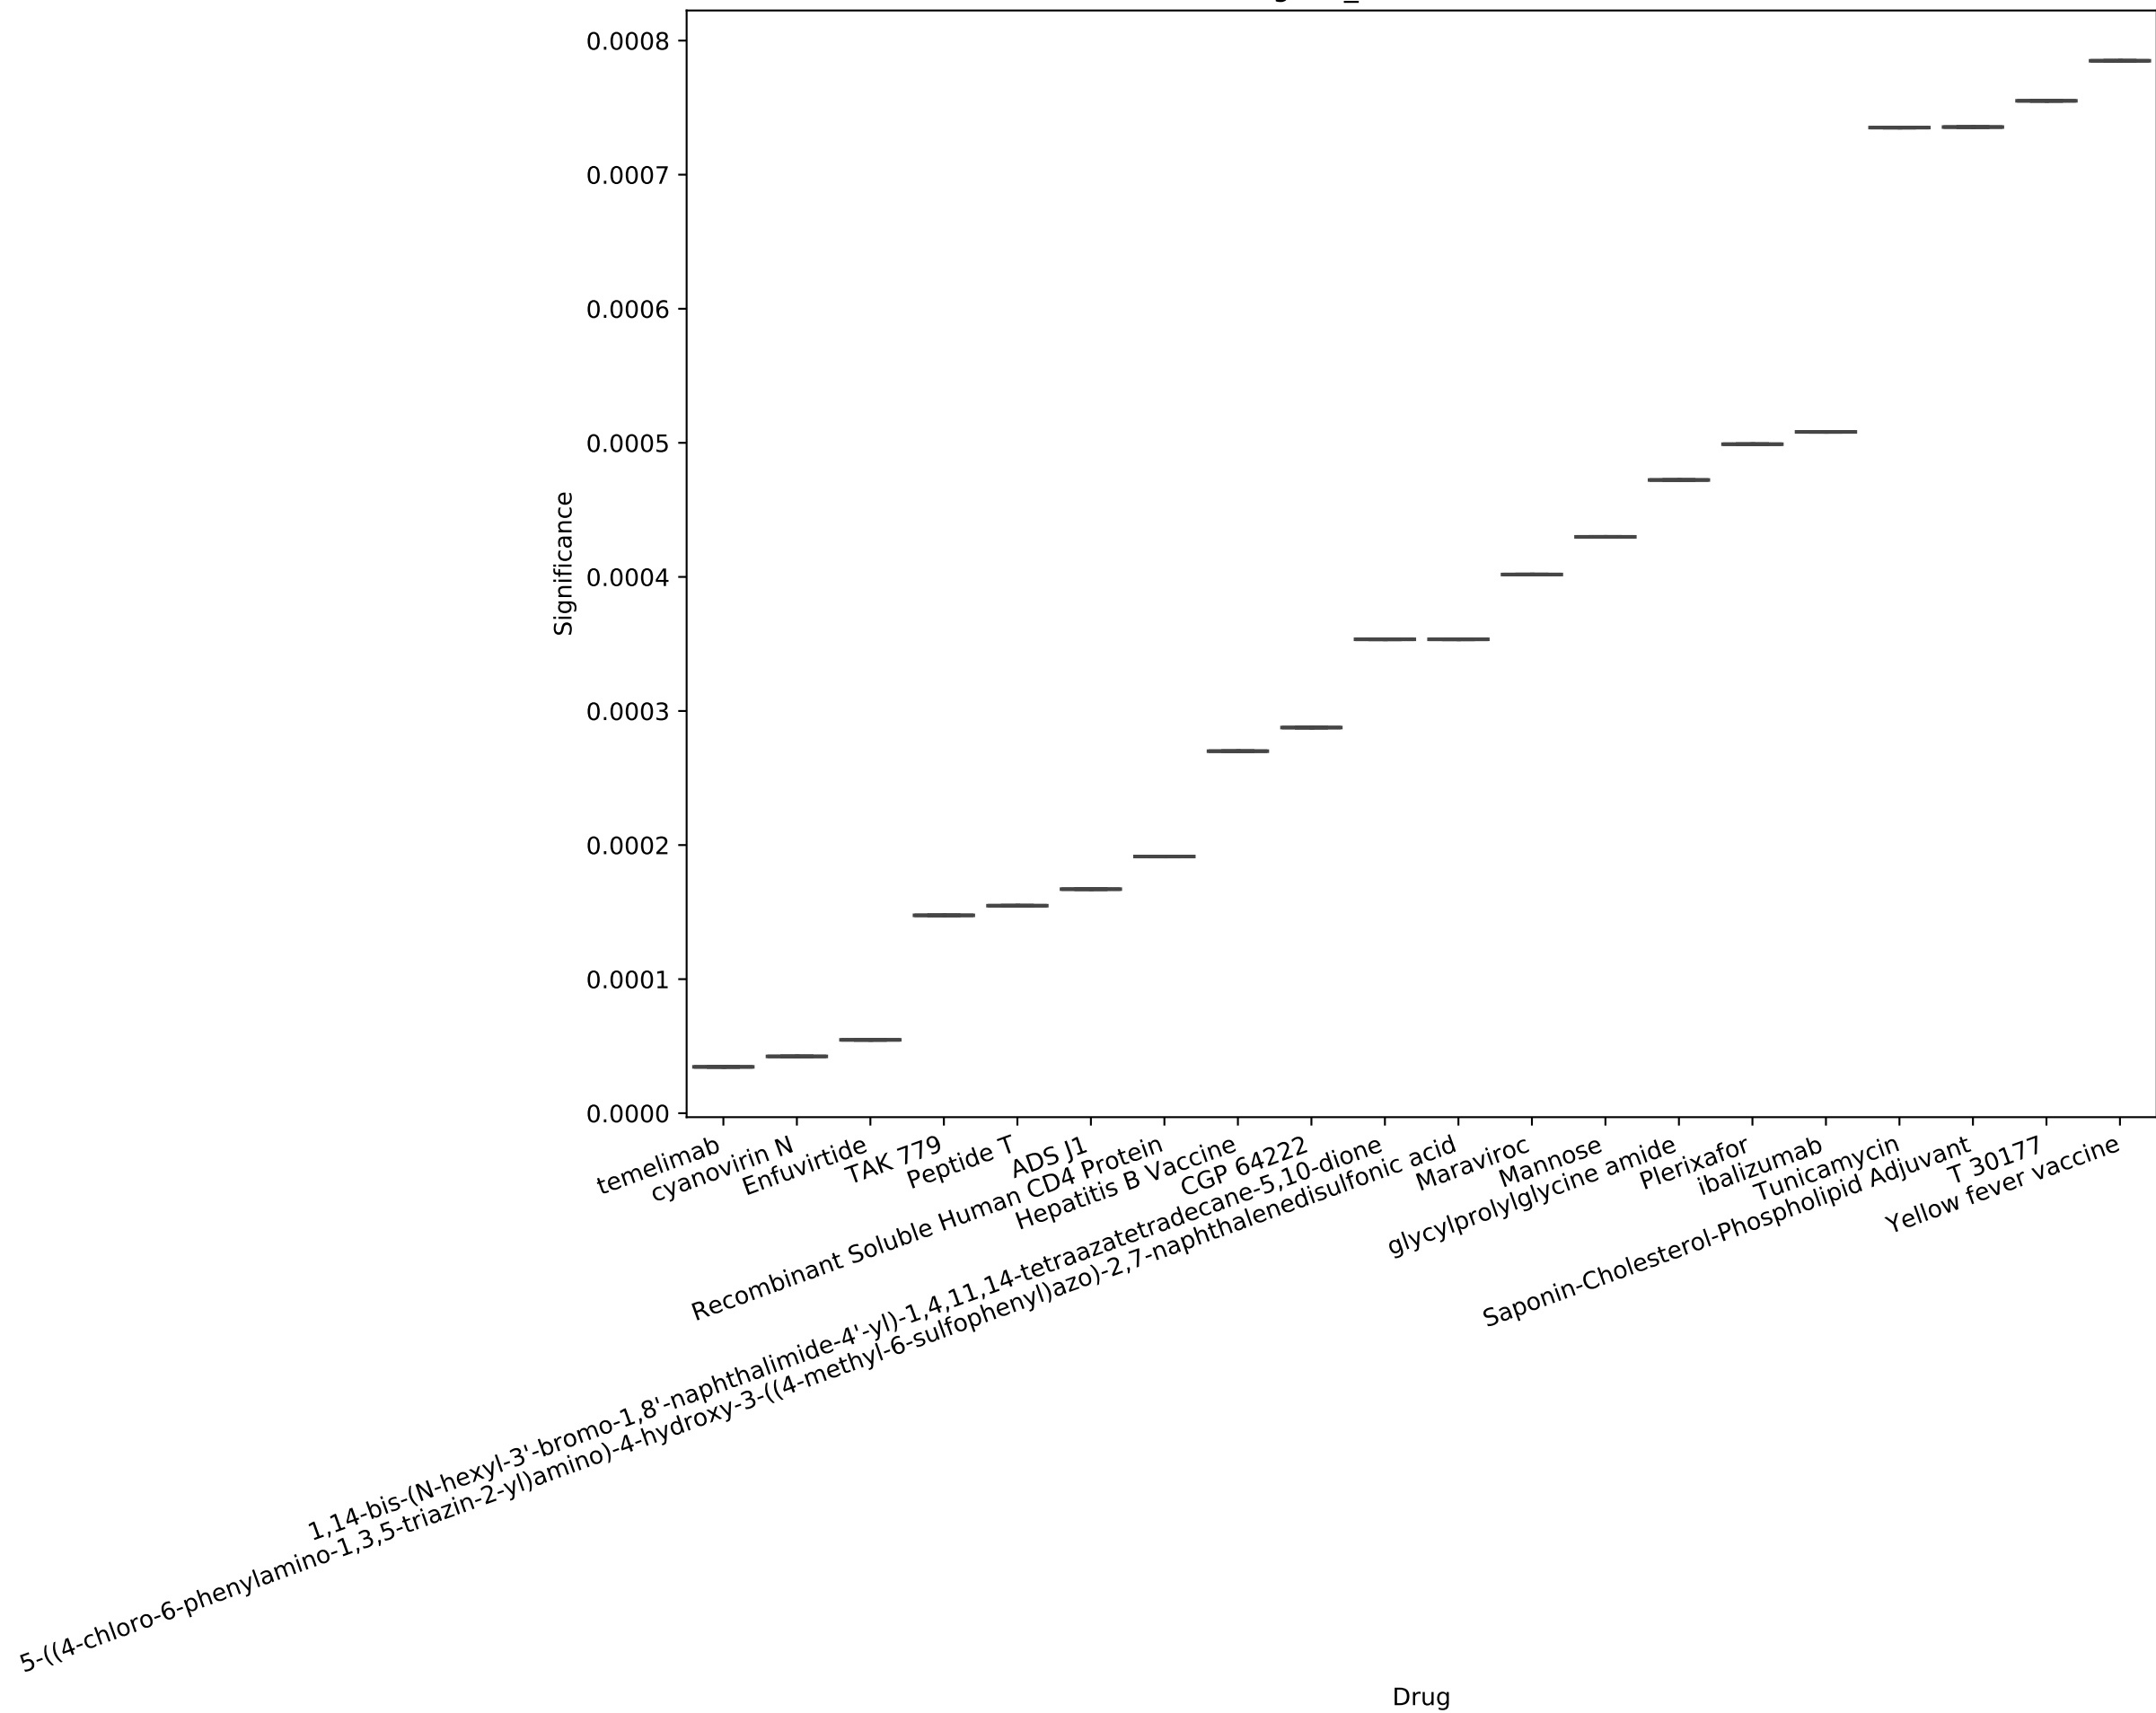

gene\_name: EXT1

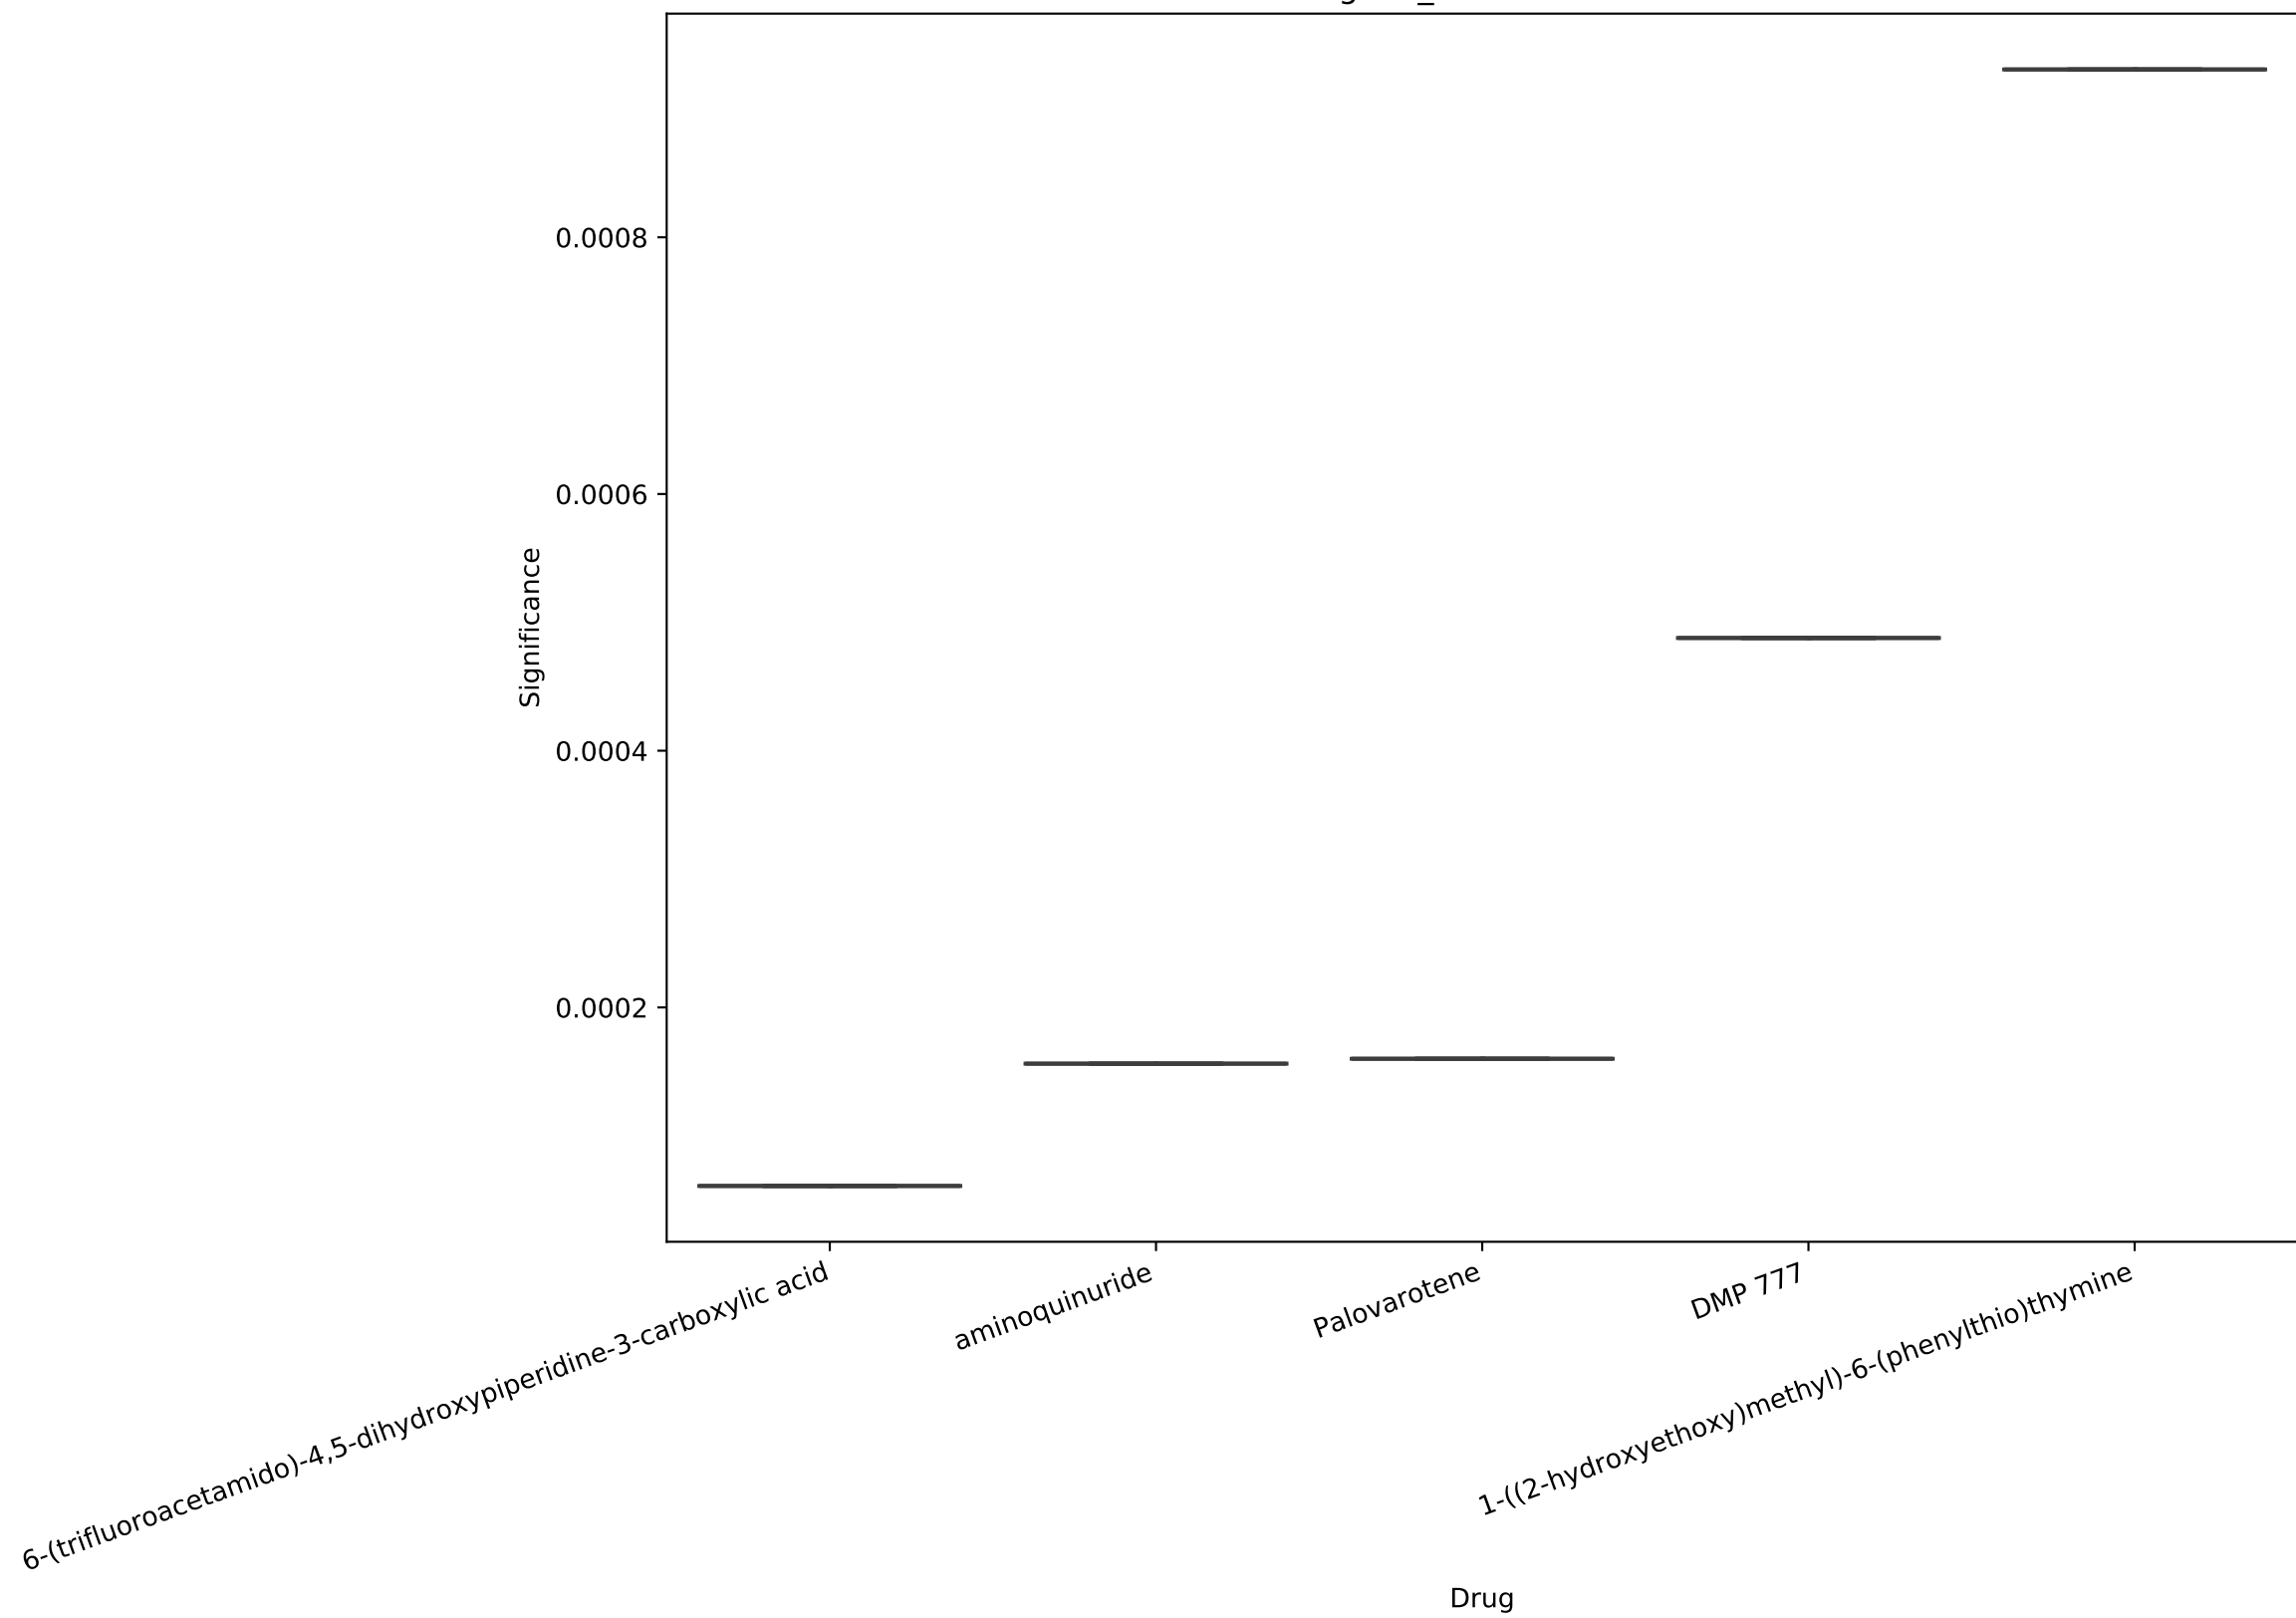

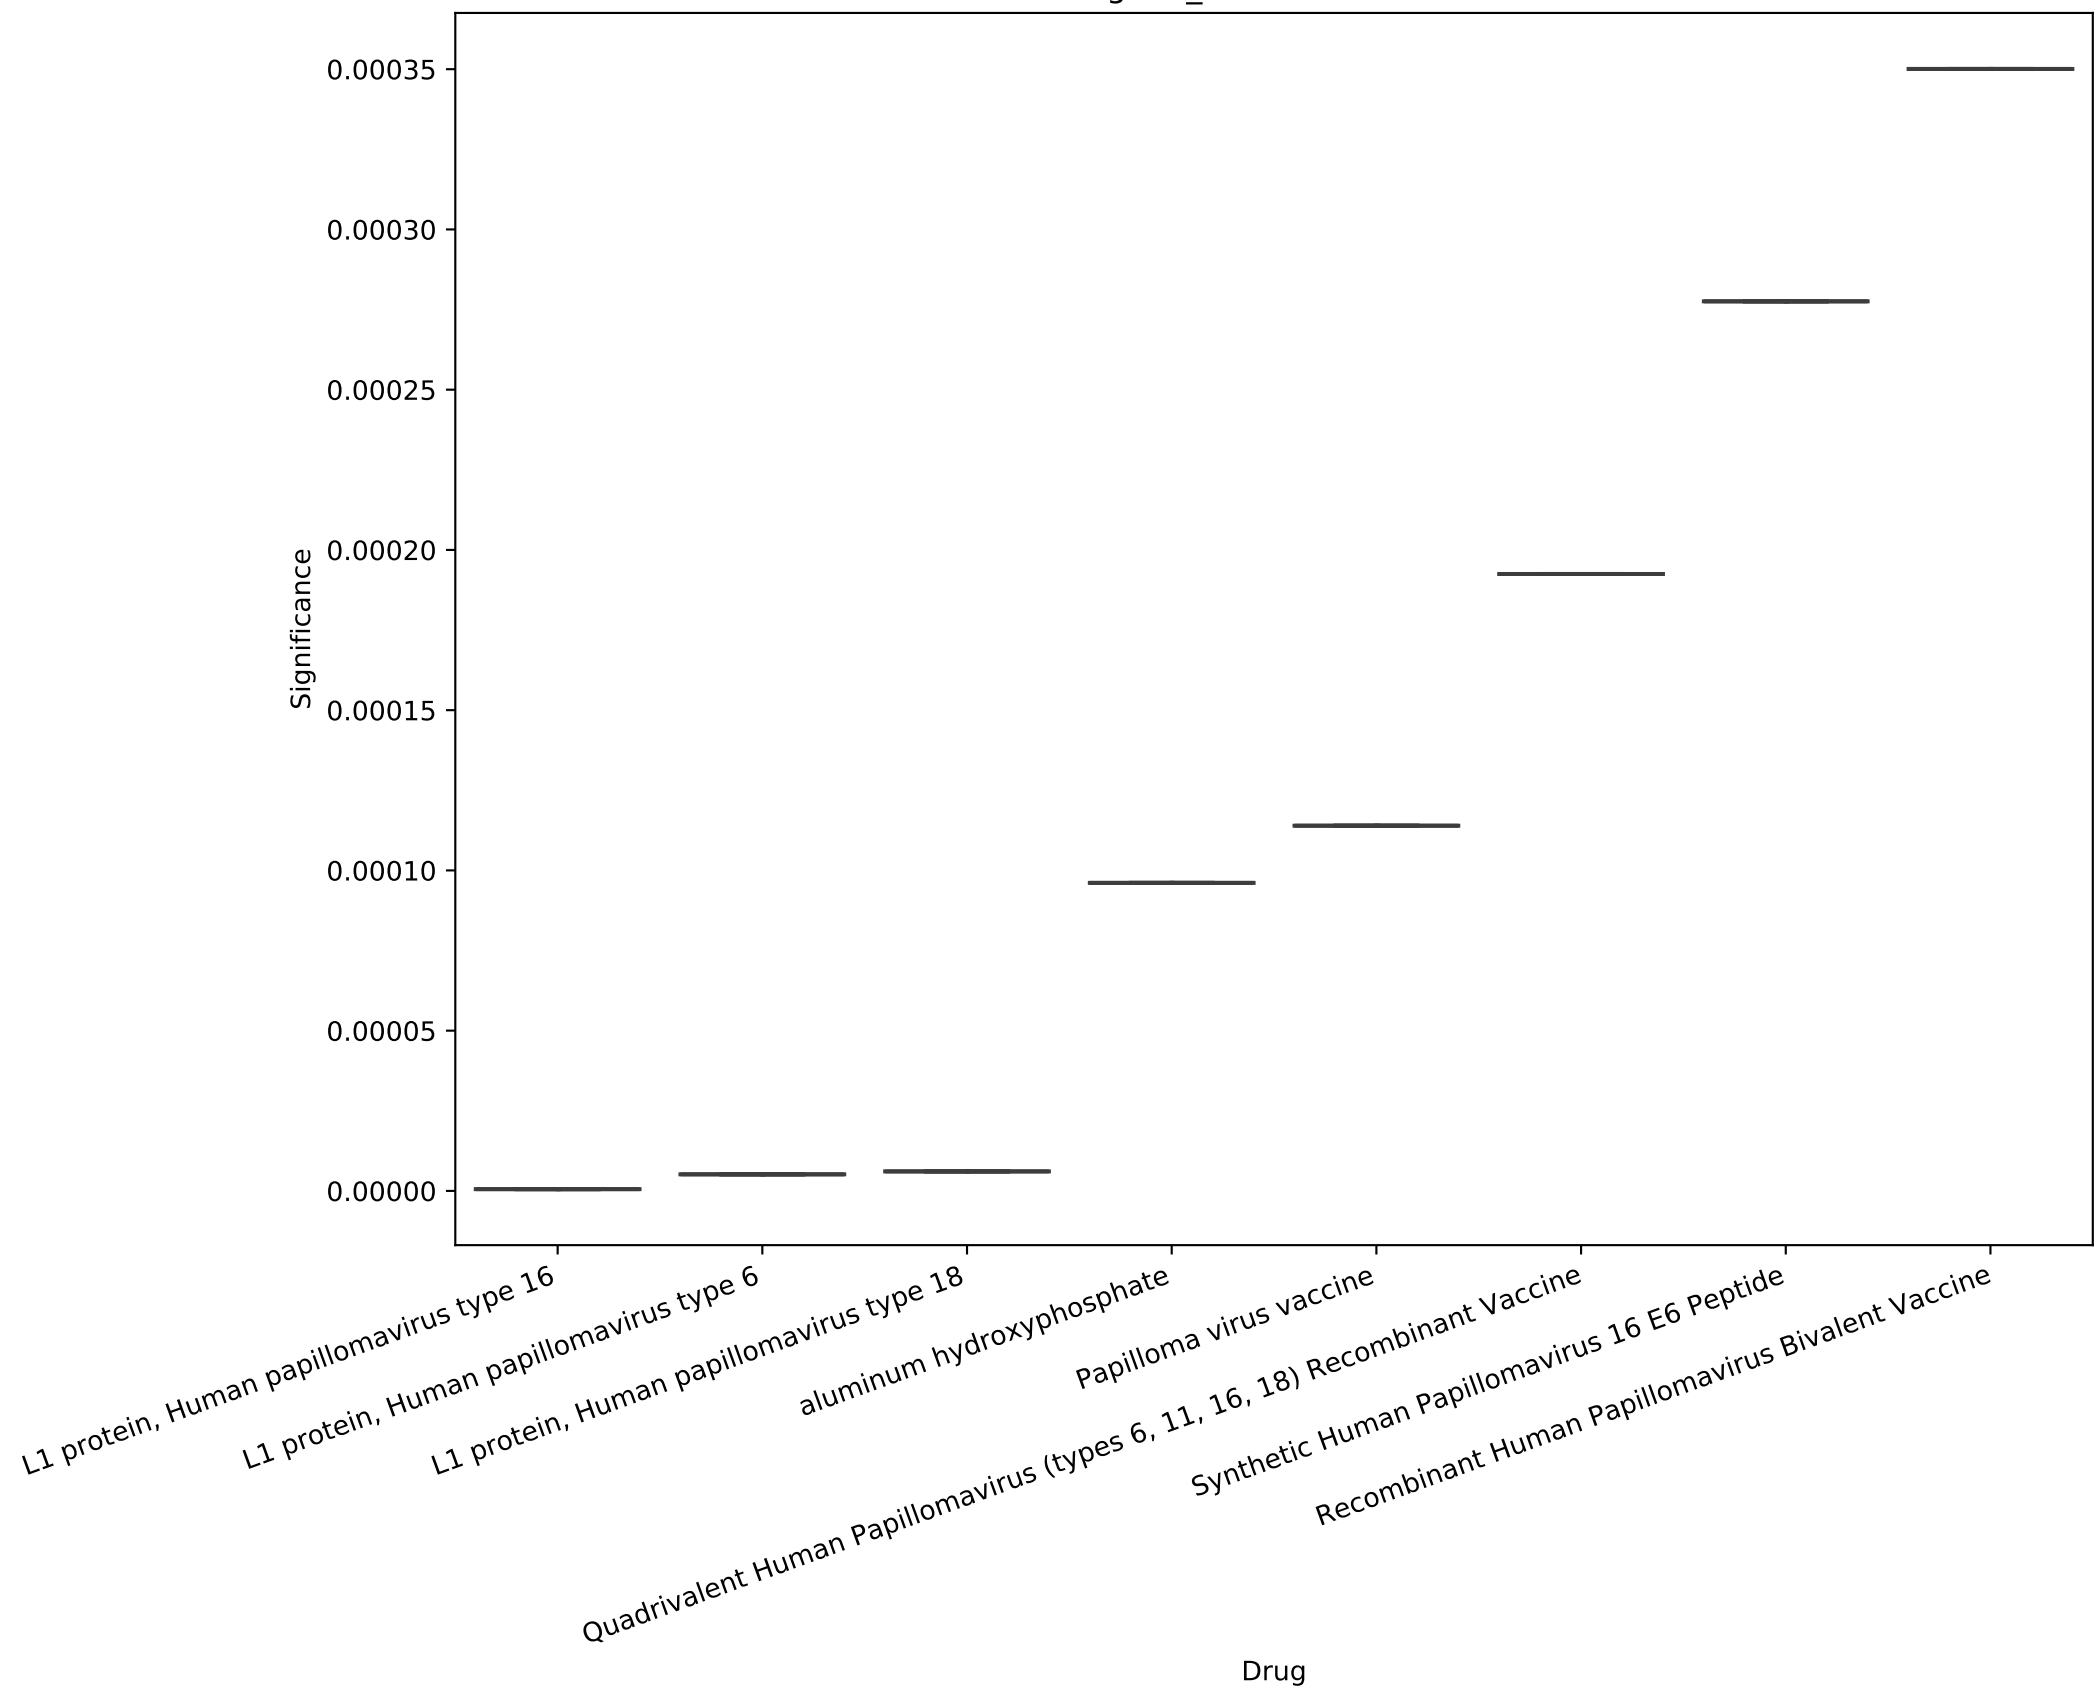

gene\_name: GPA33

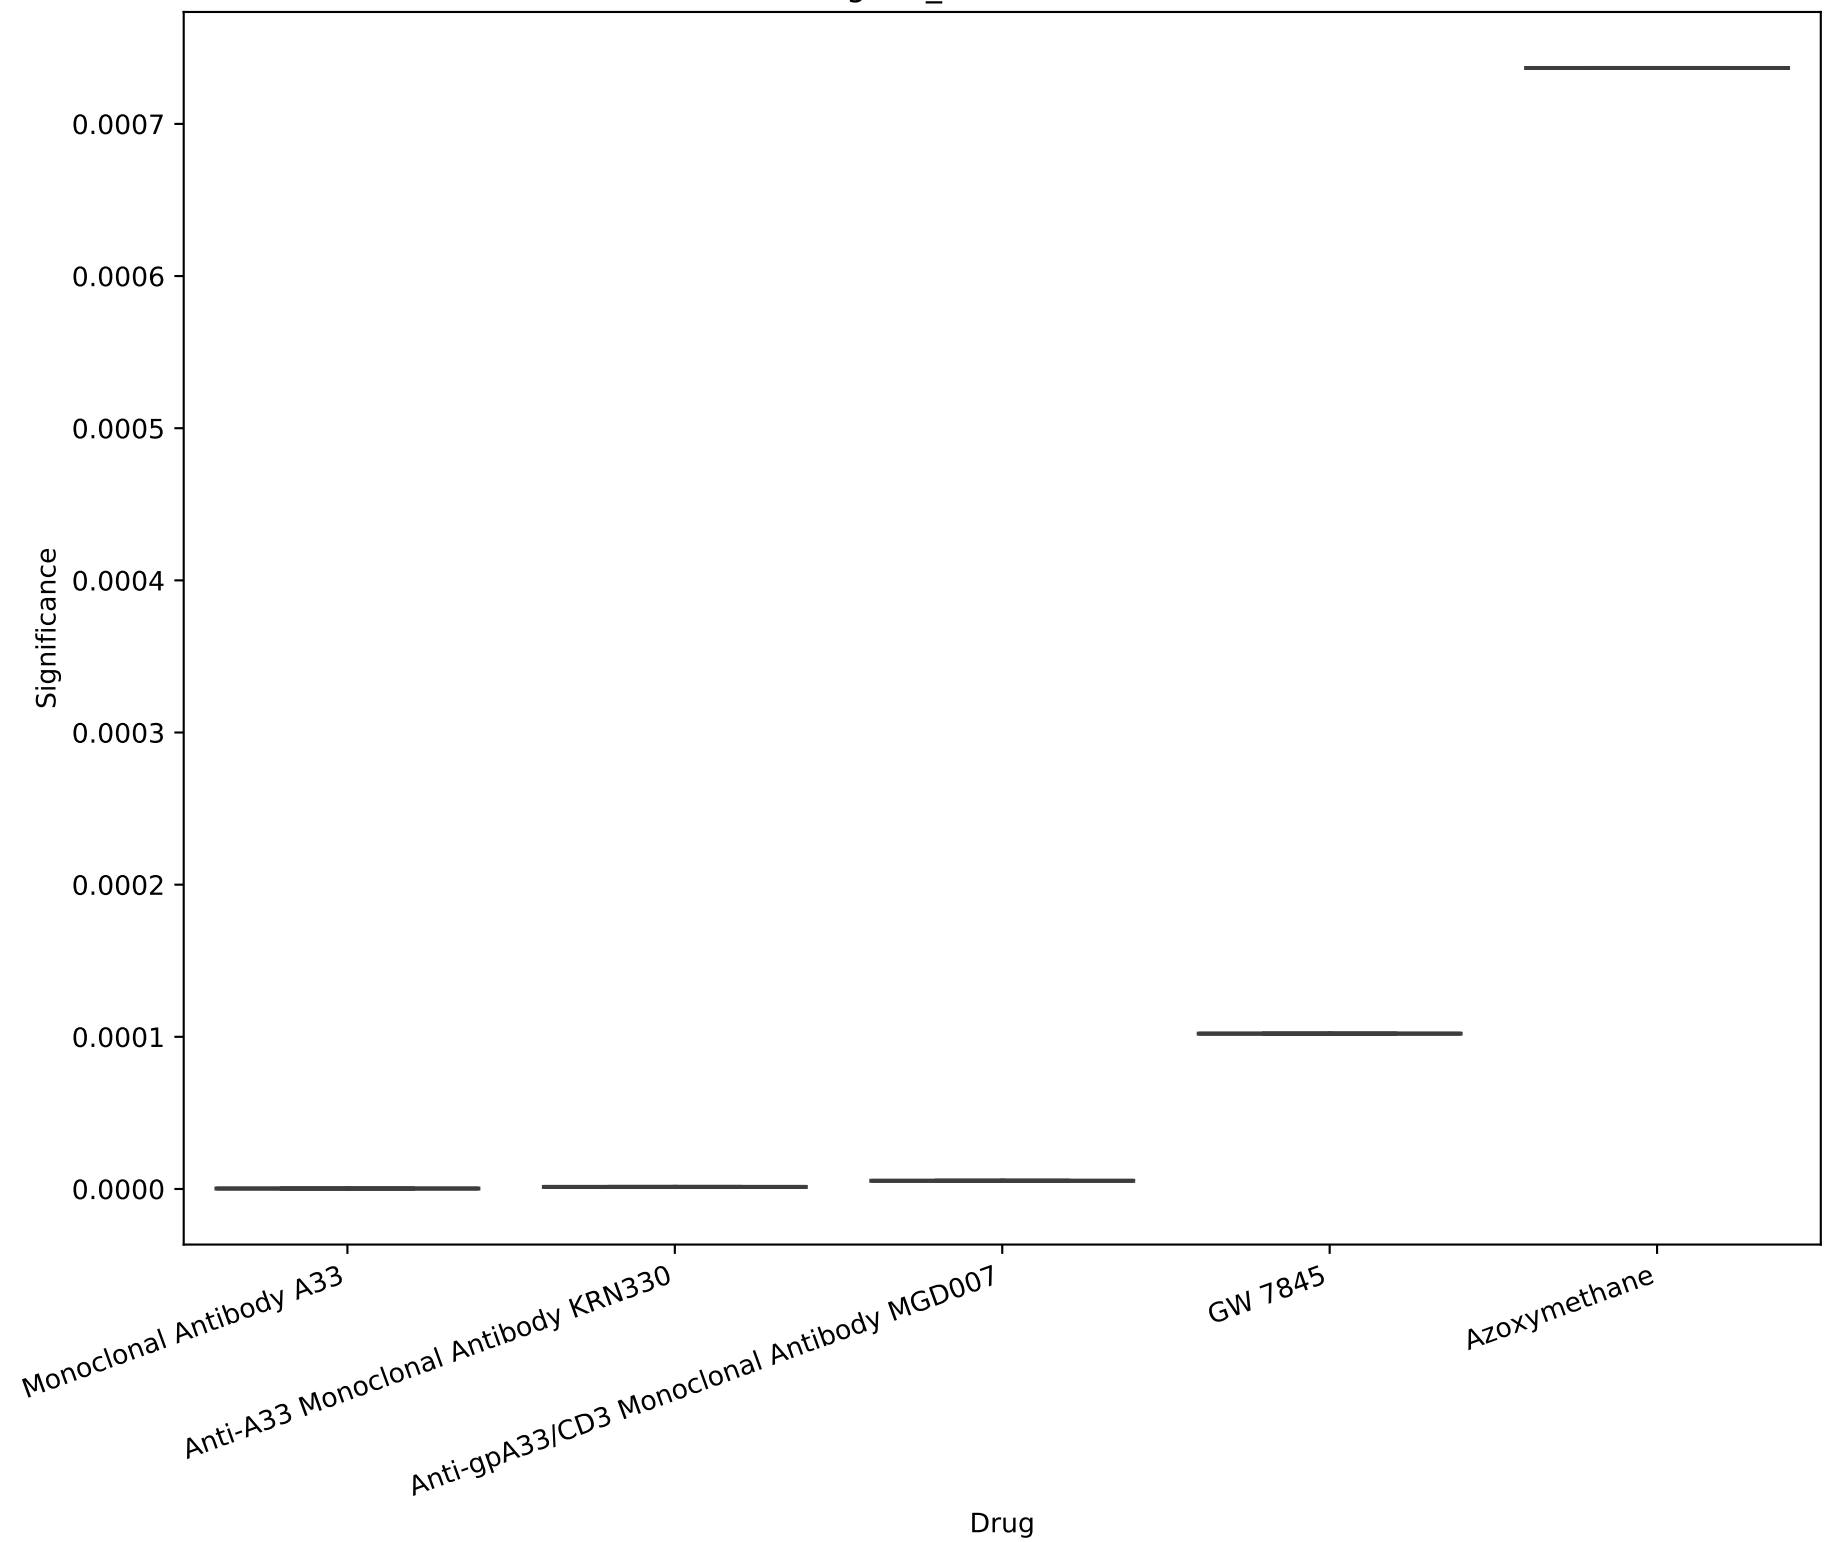

gene\_name: GPT

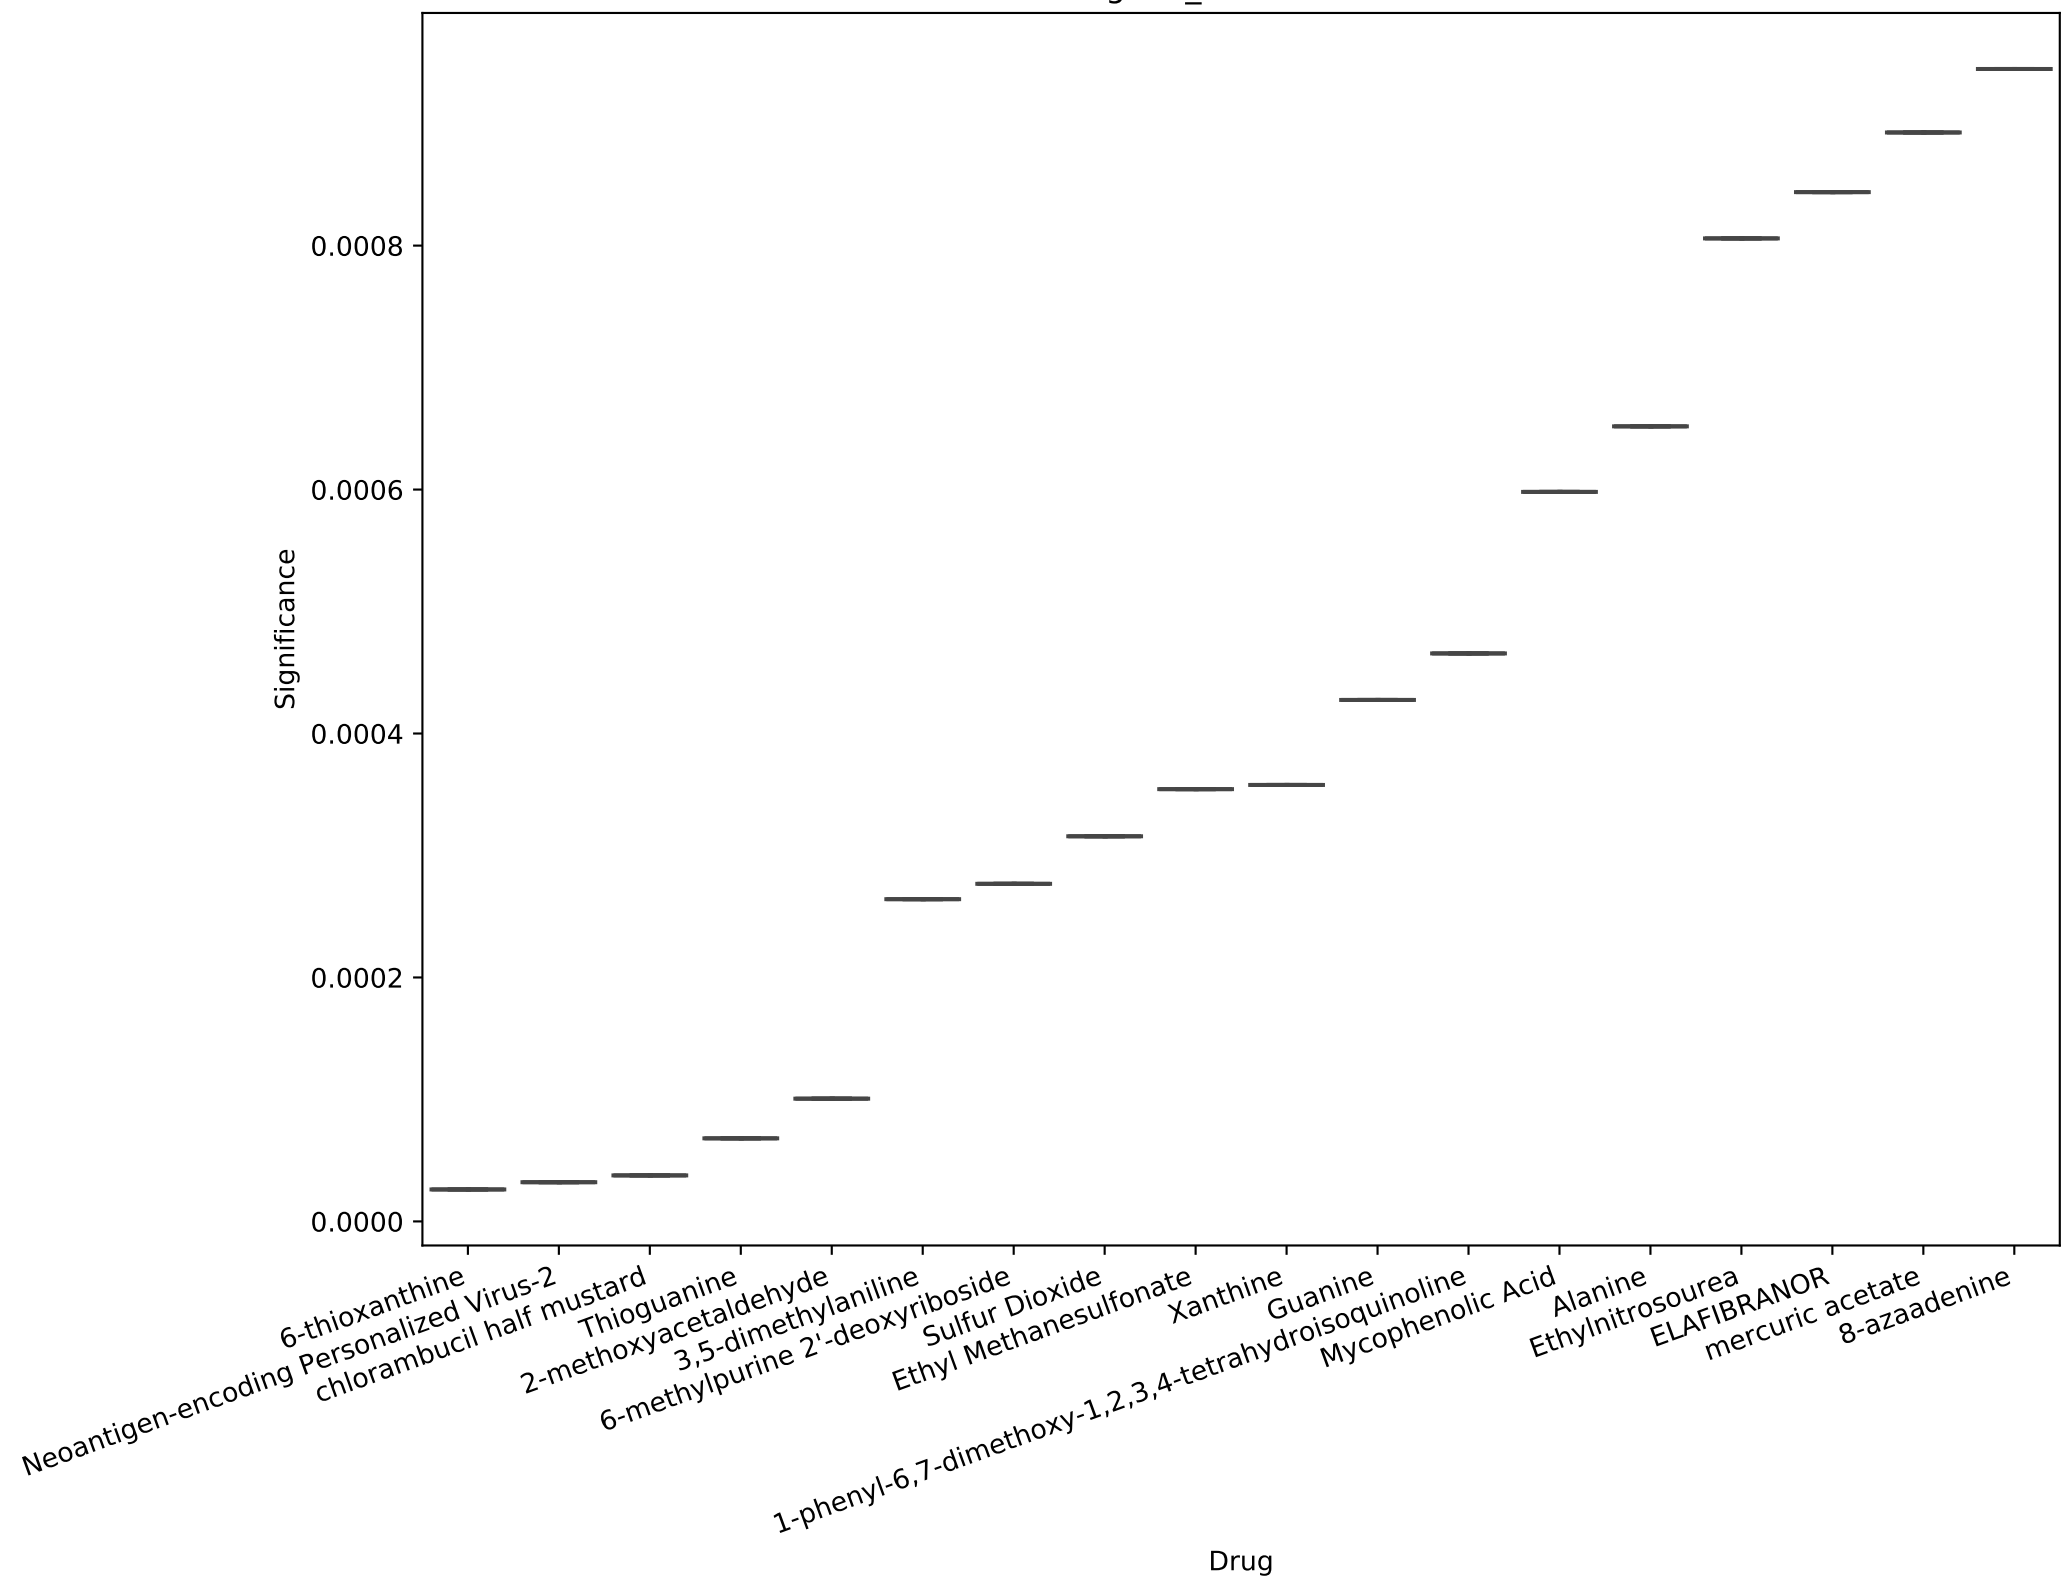



gene\_name: HAP1

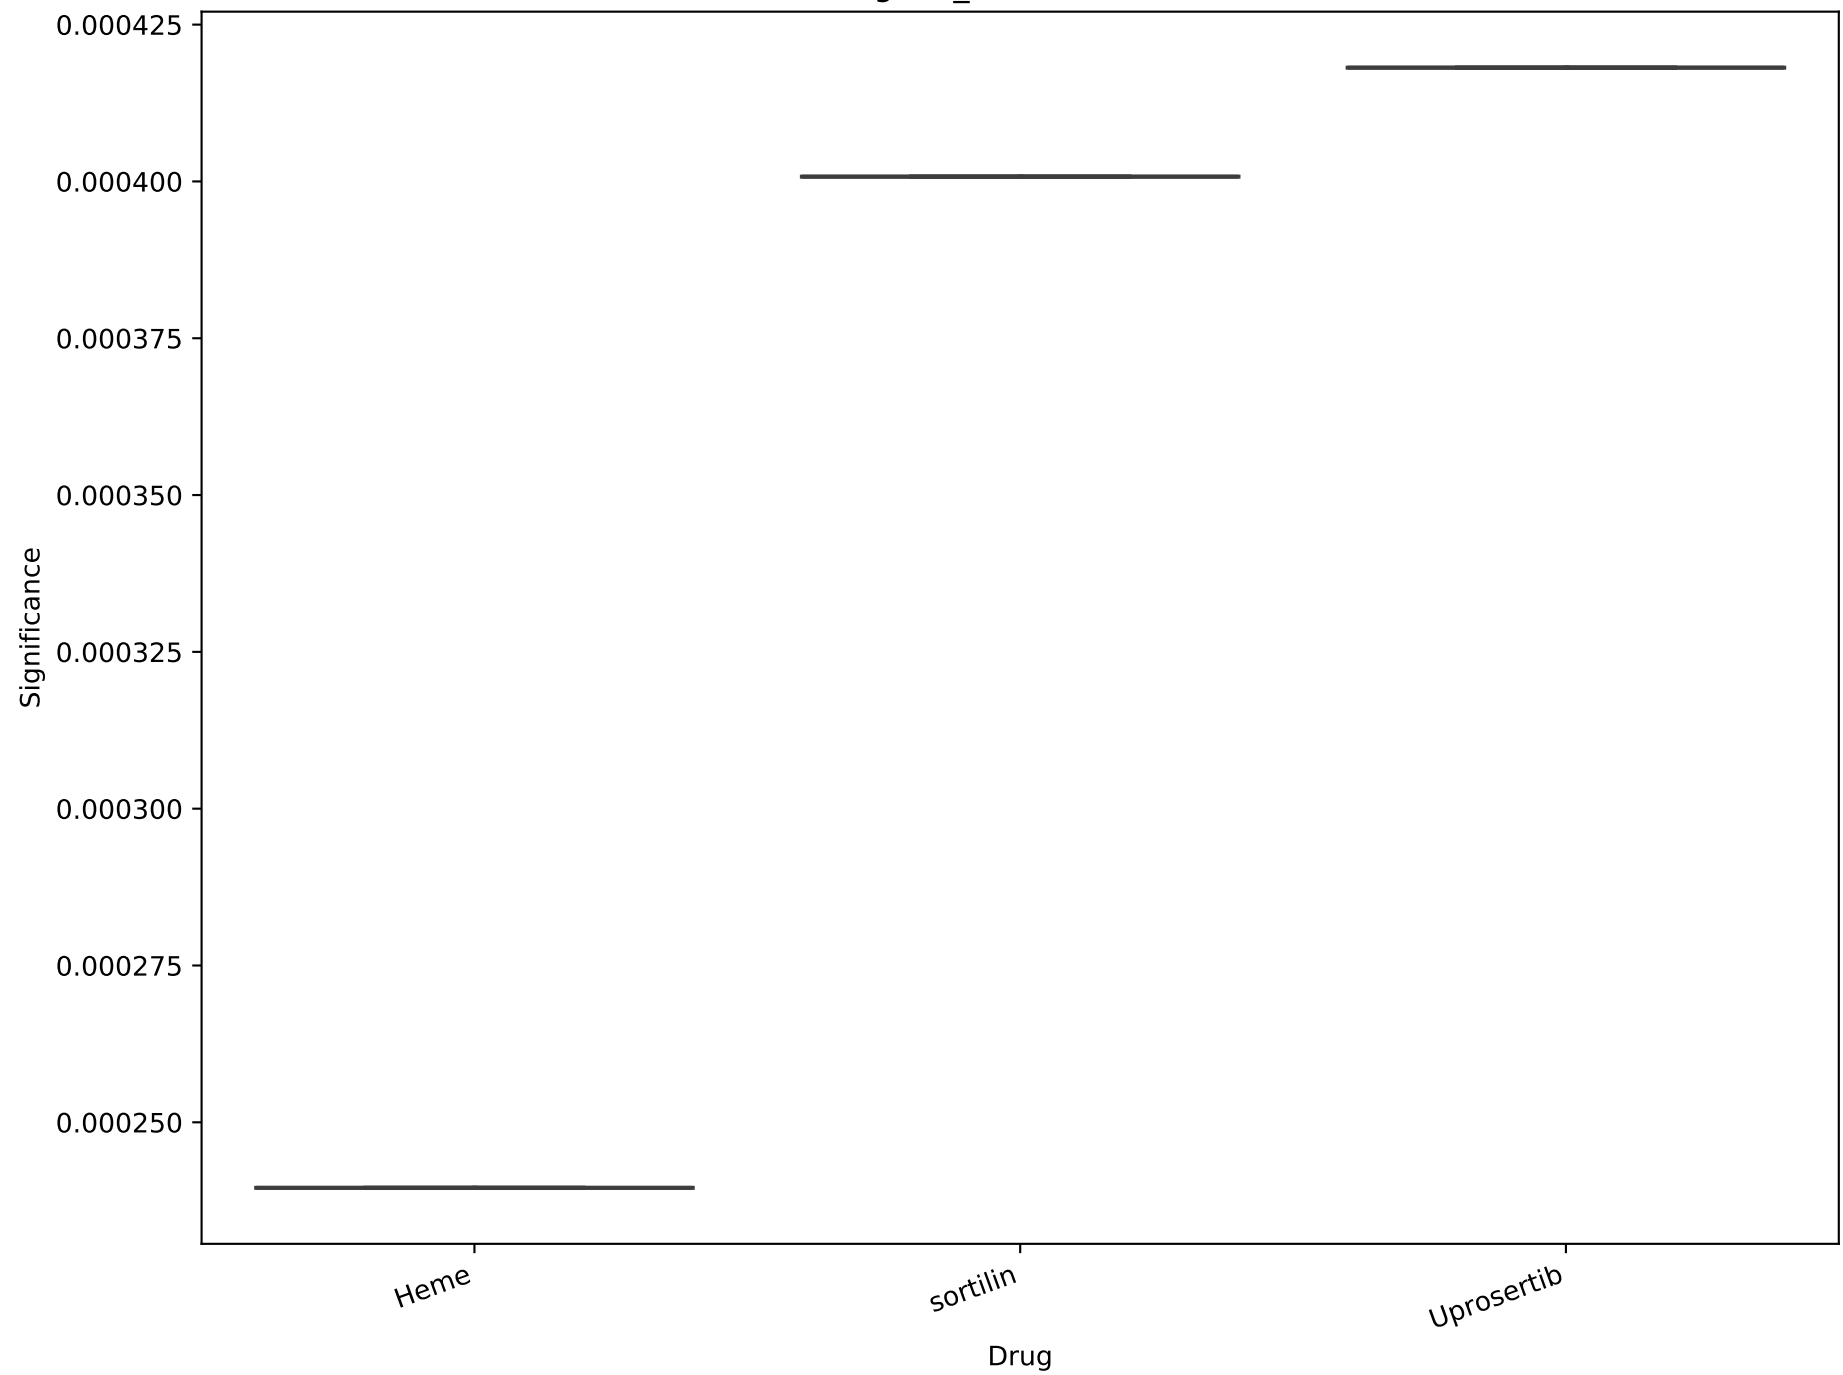

gene\_name: HLA-A

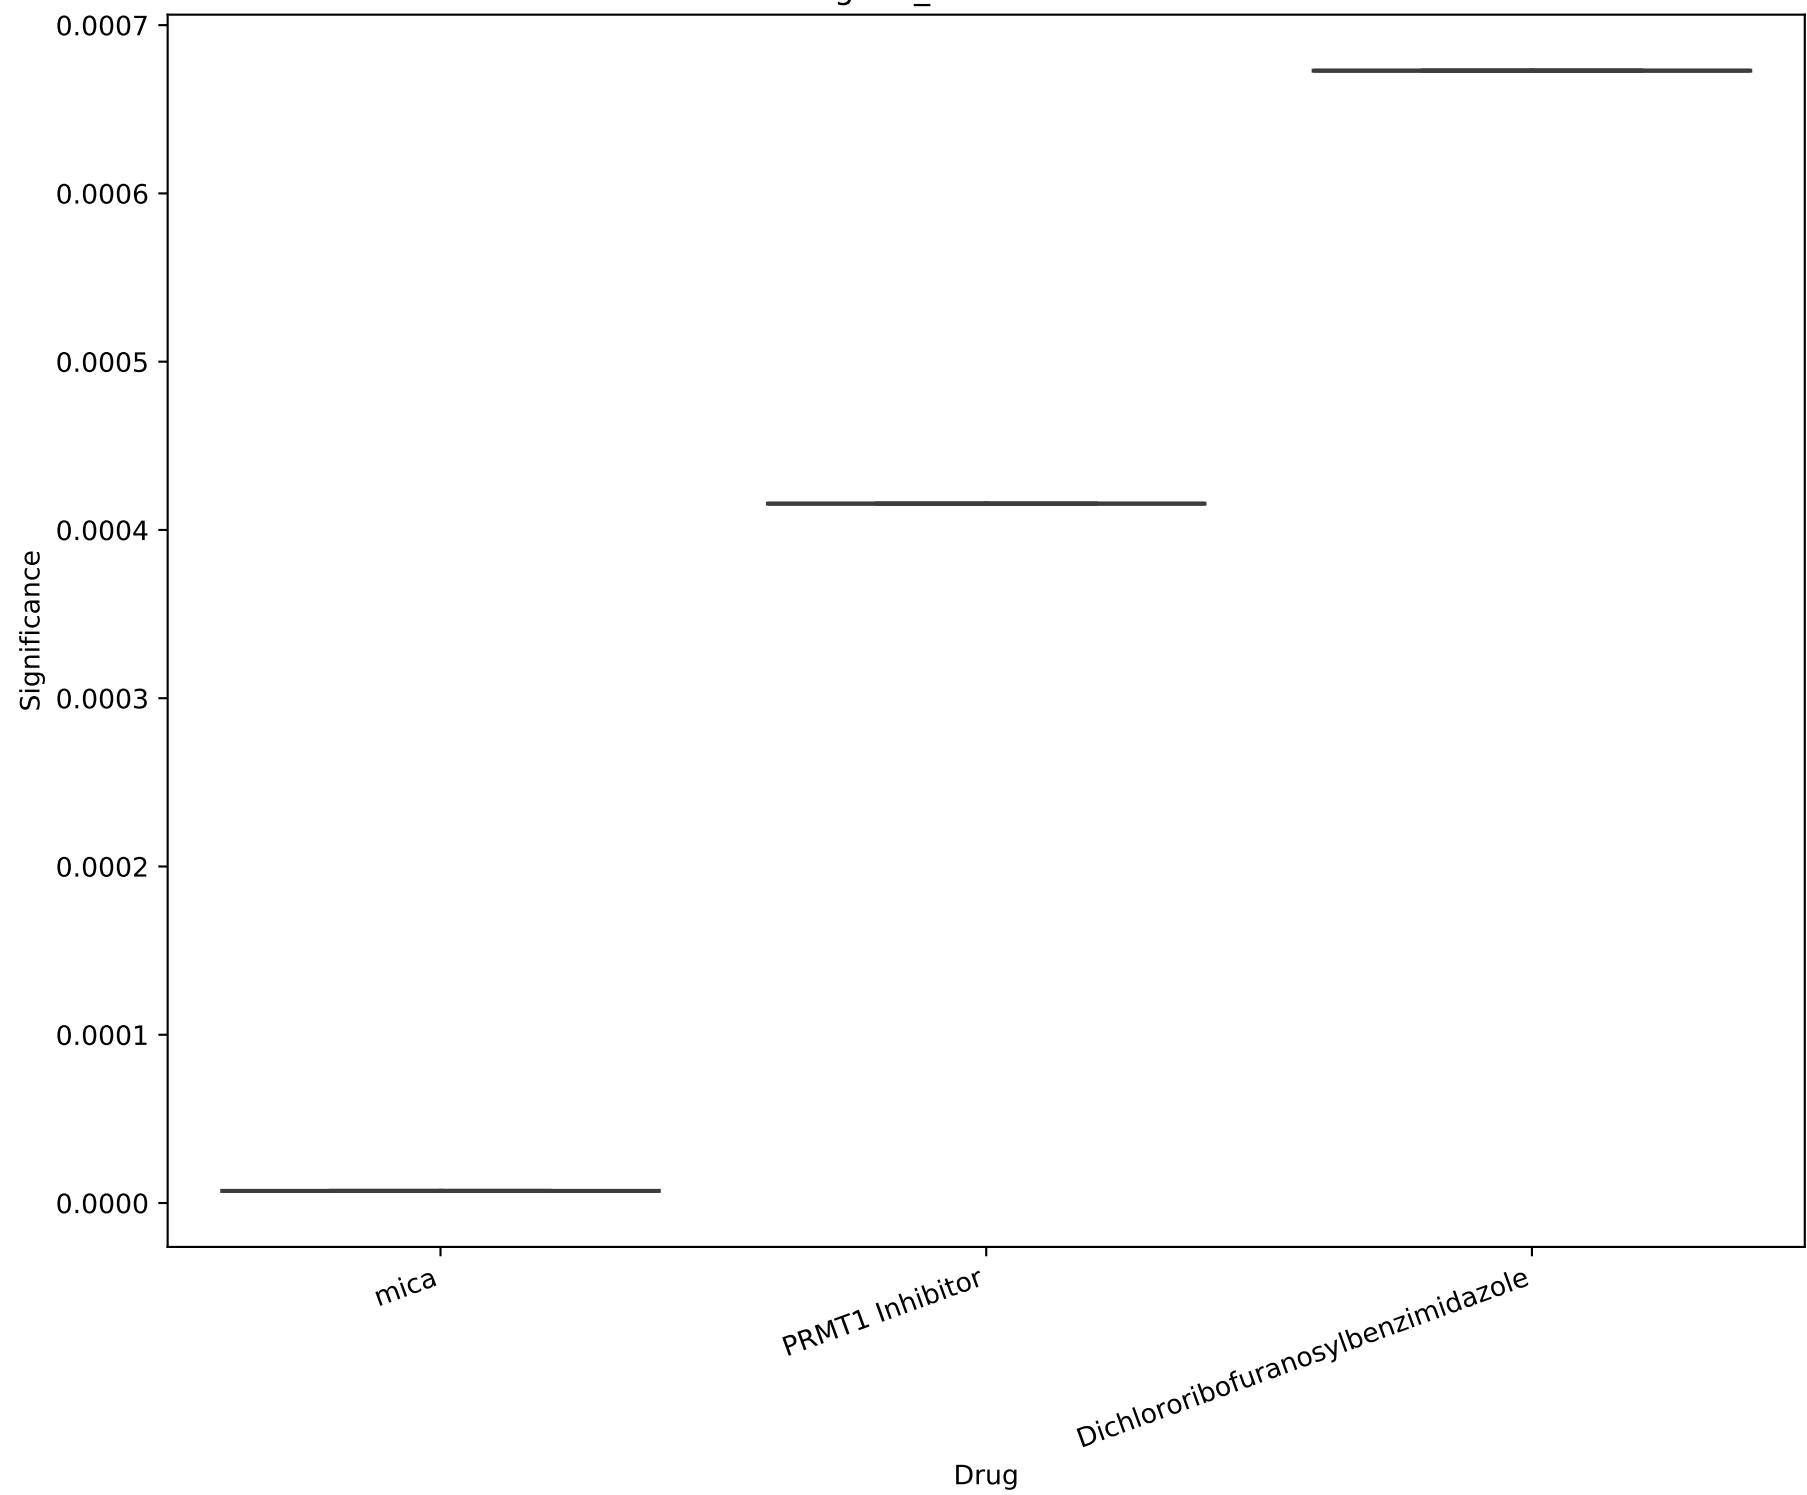

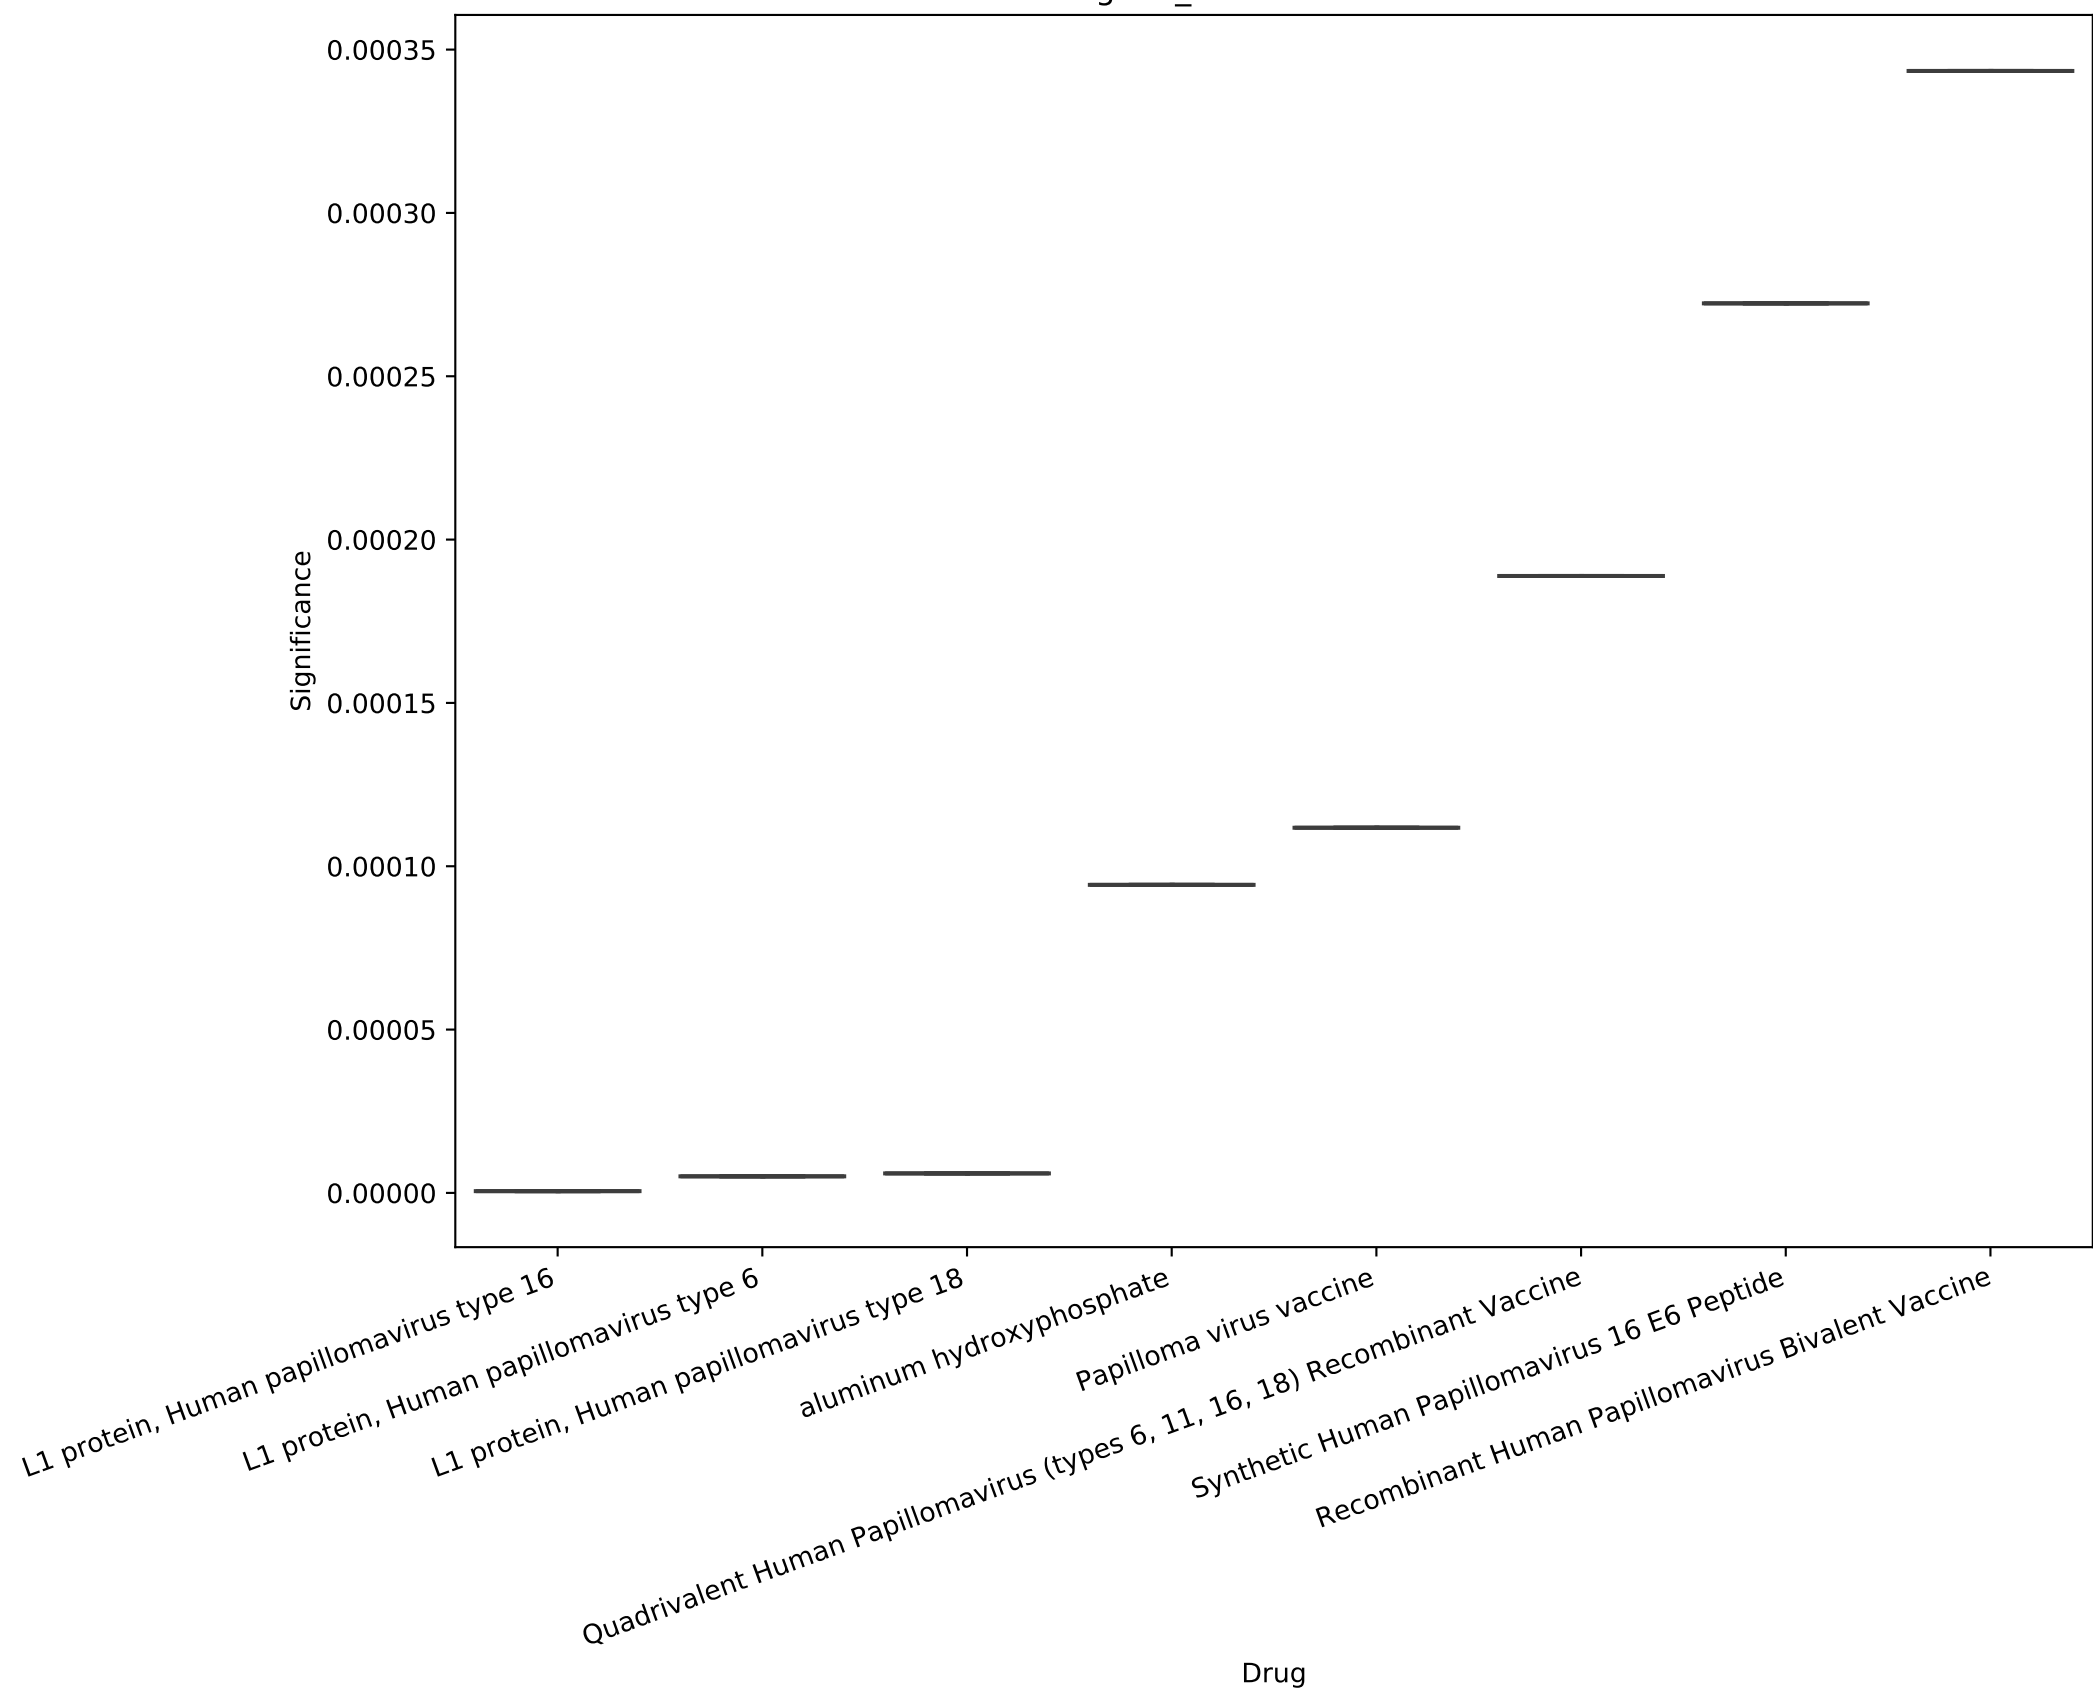

gene\_name: KLHL2

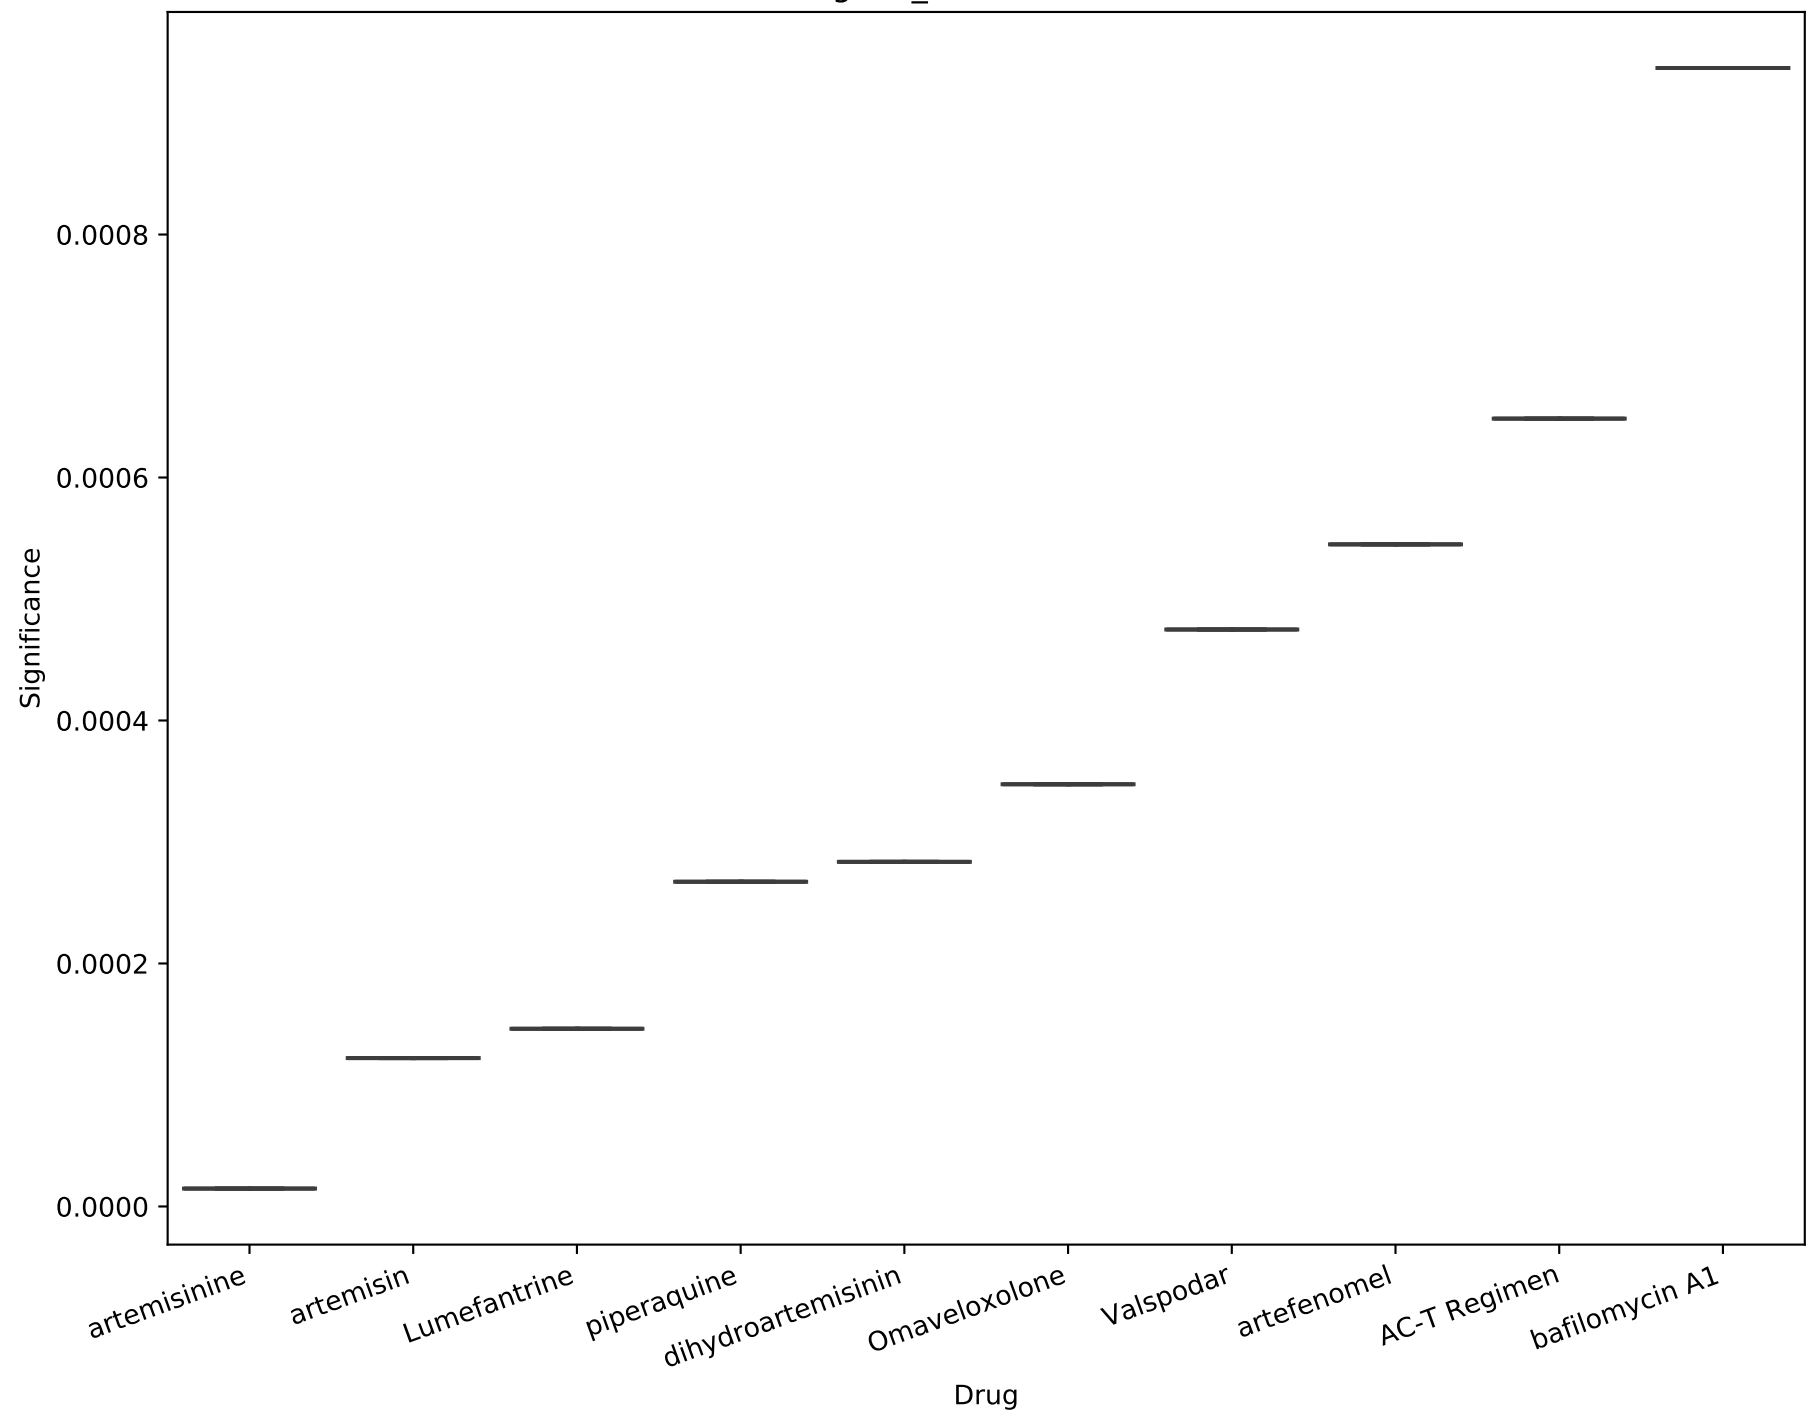

gene\_name: KLRK1

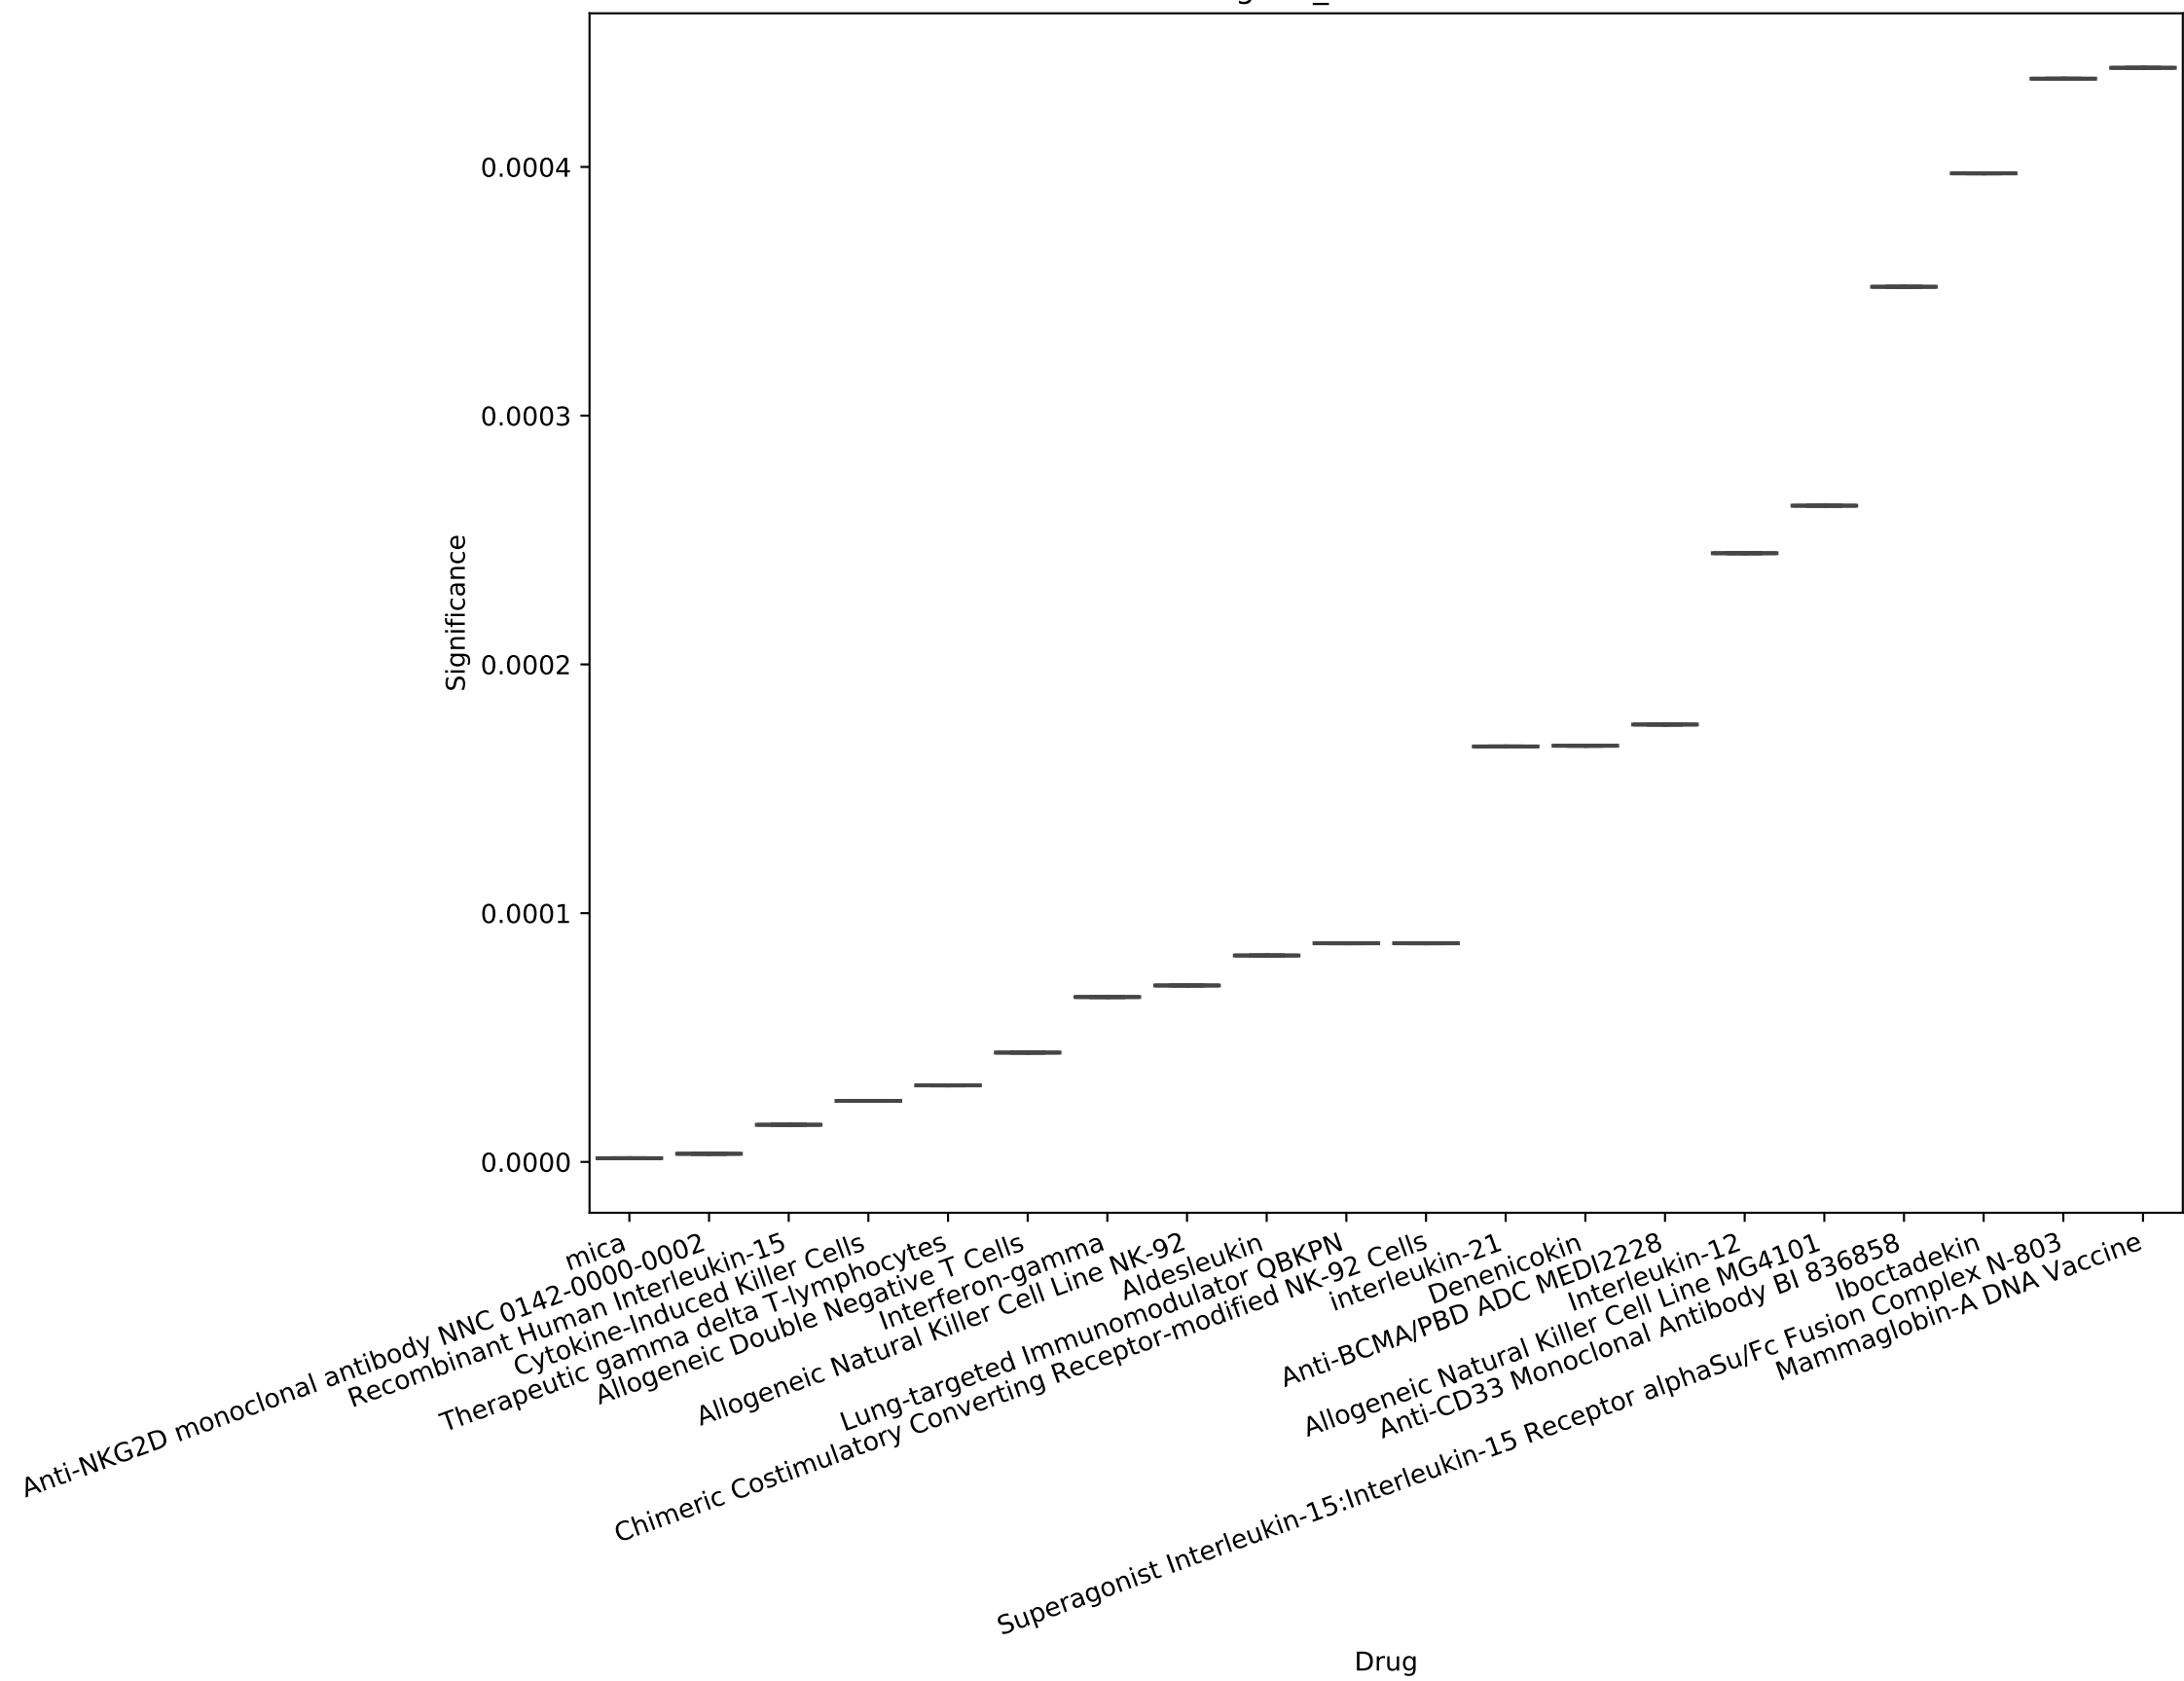

gene\_name: LRRC32

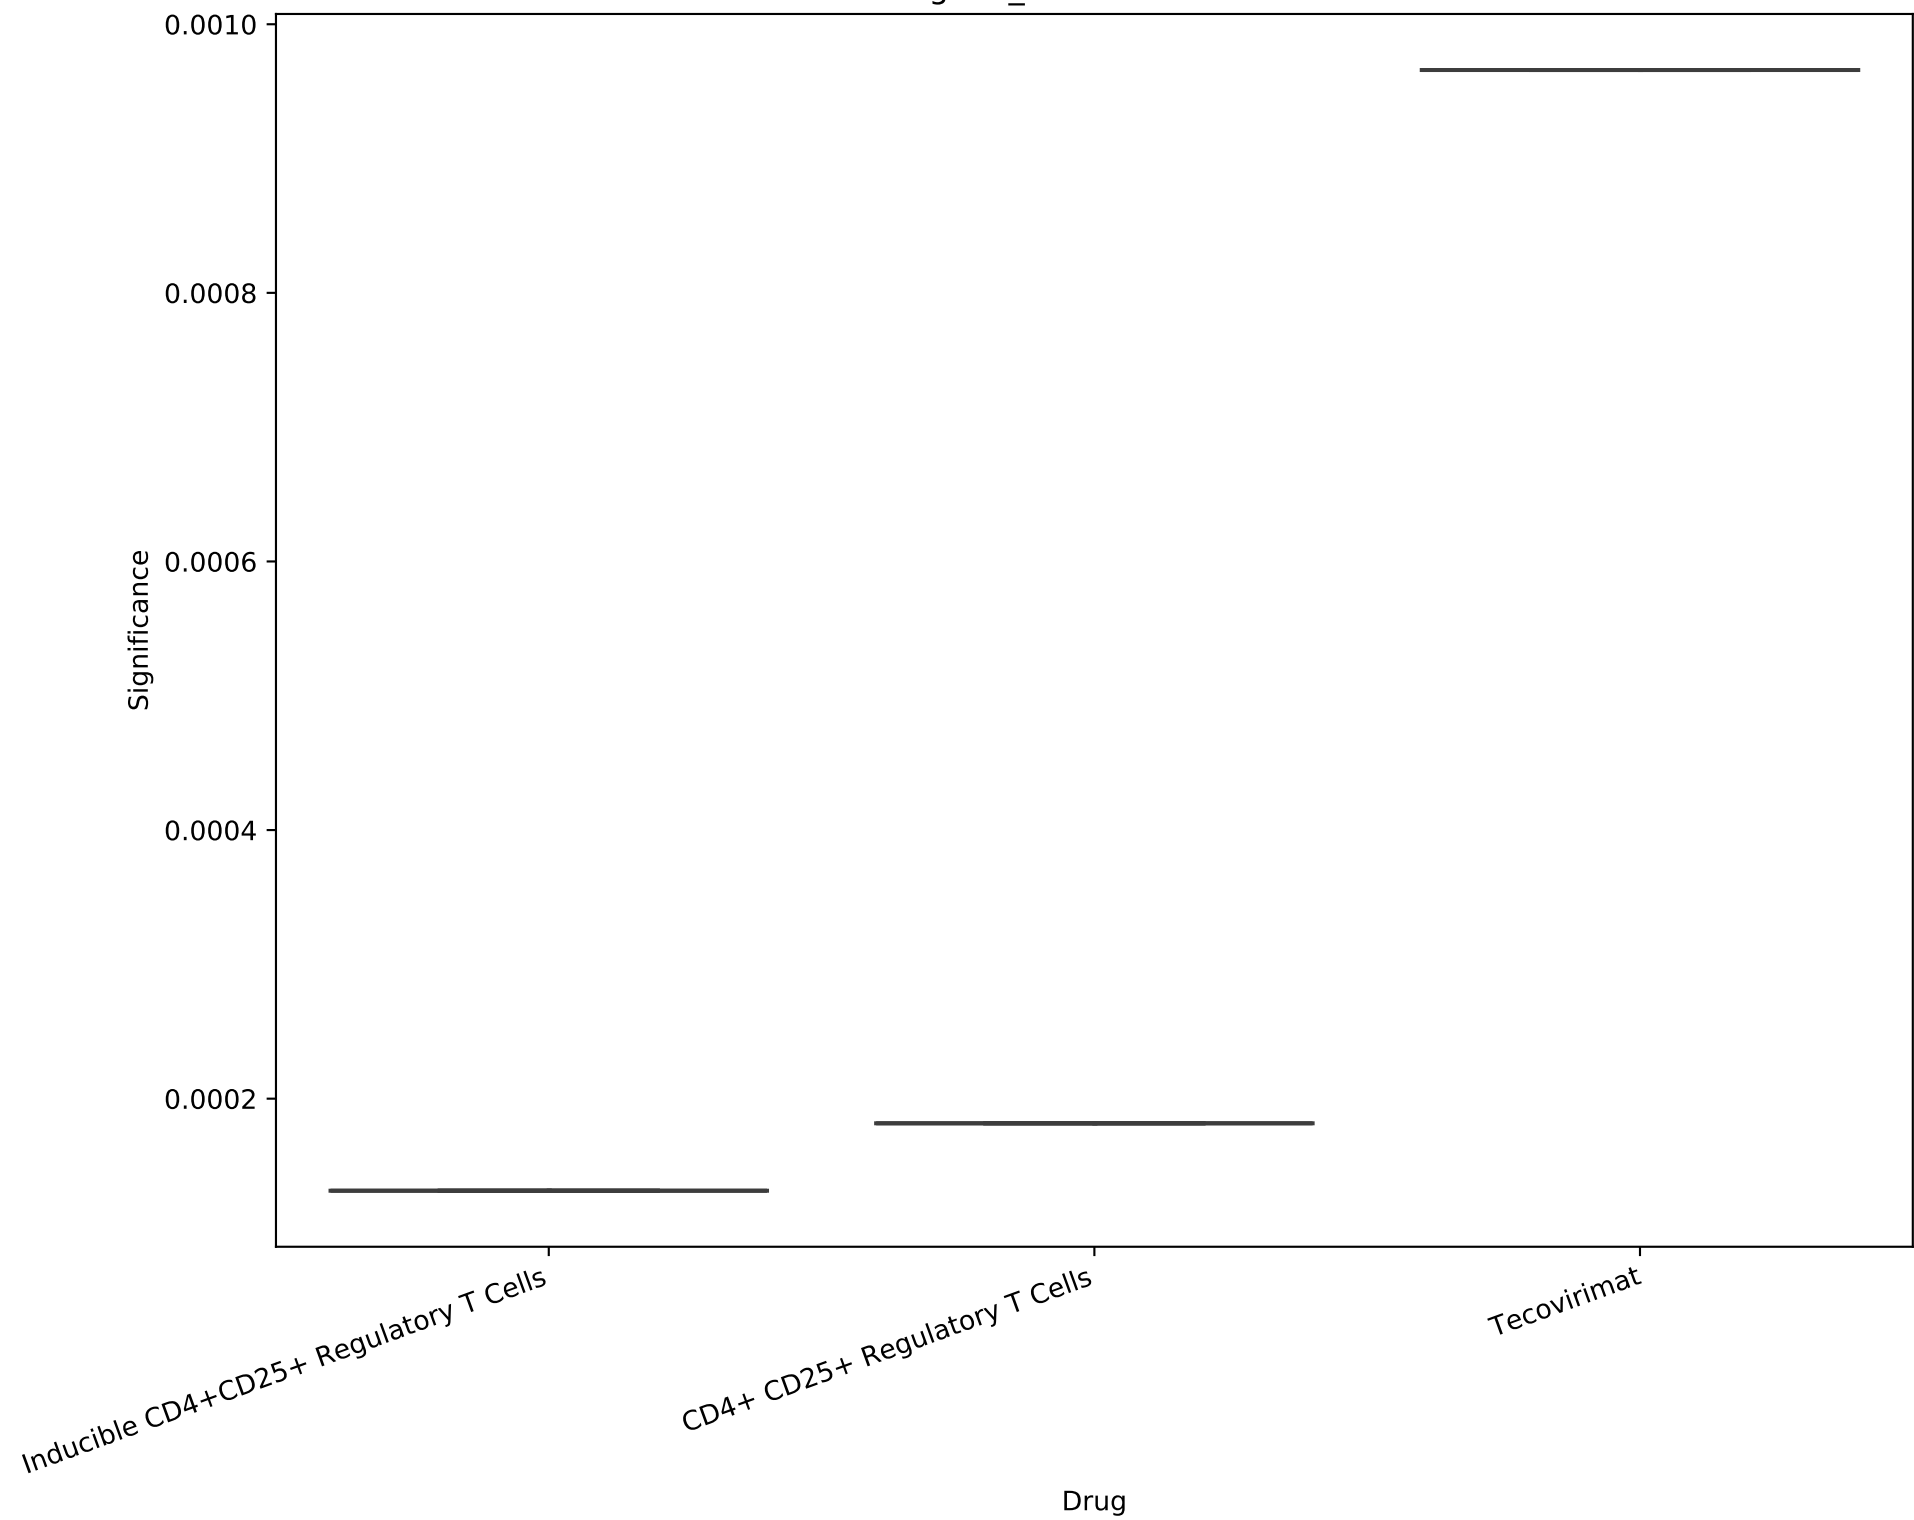

gene\_name: MAPKAPK2

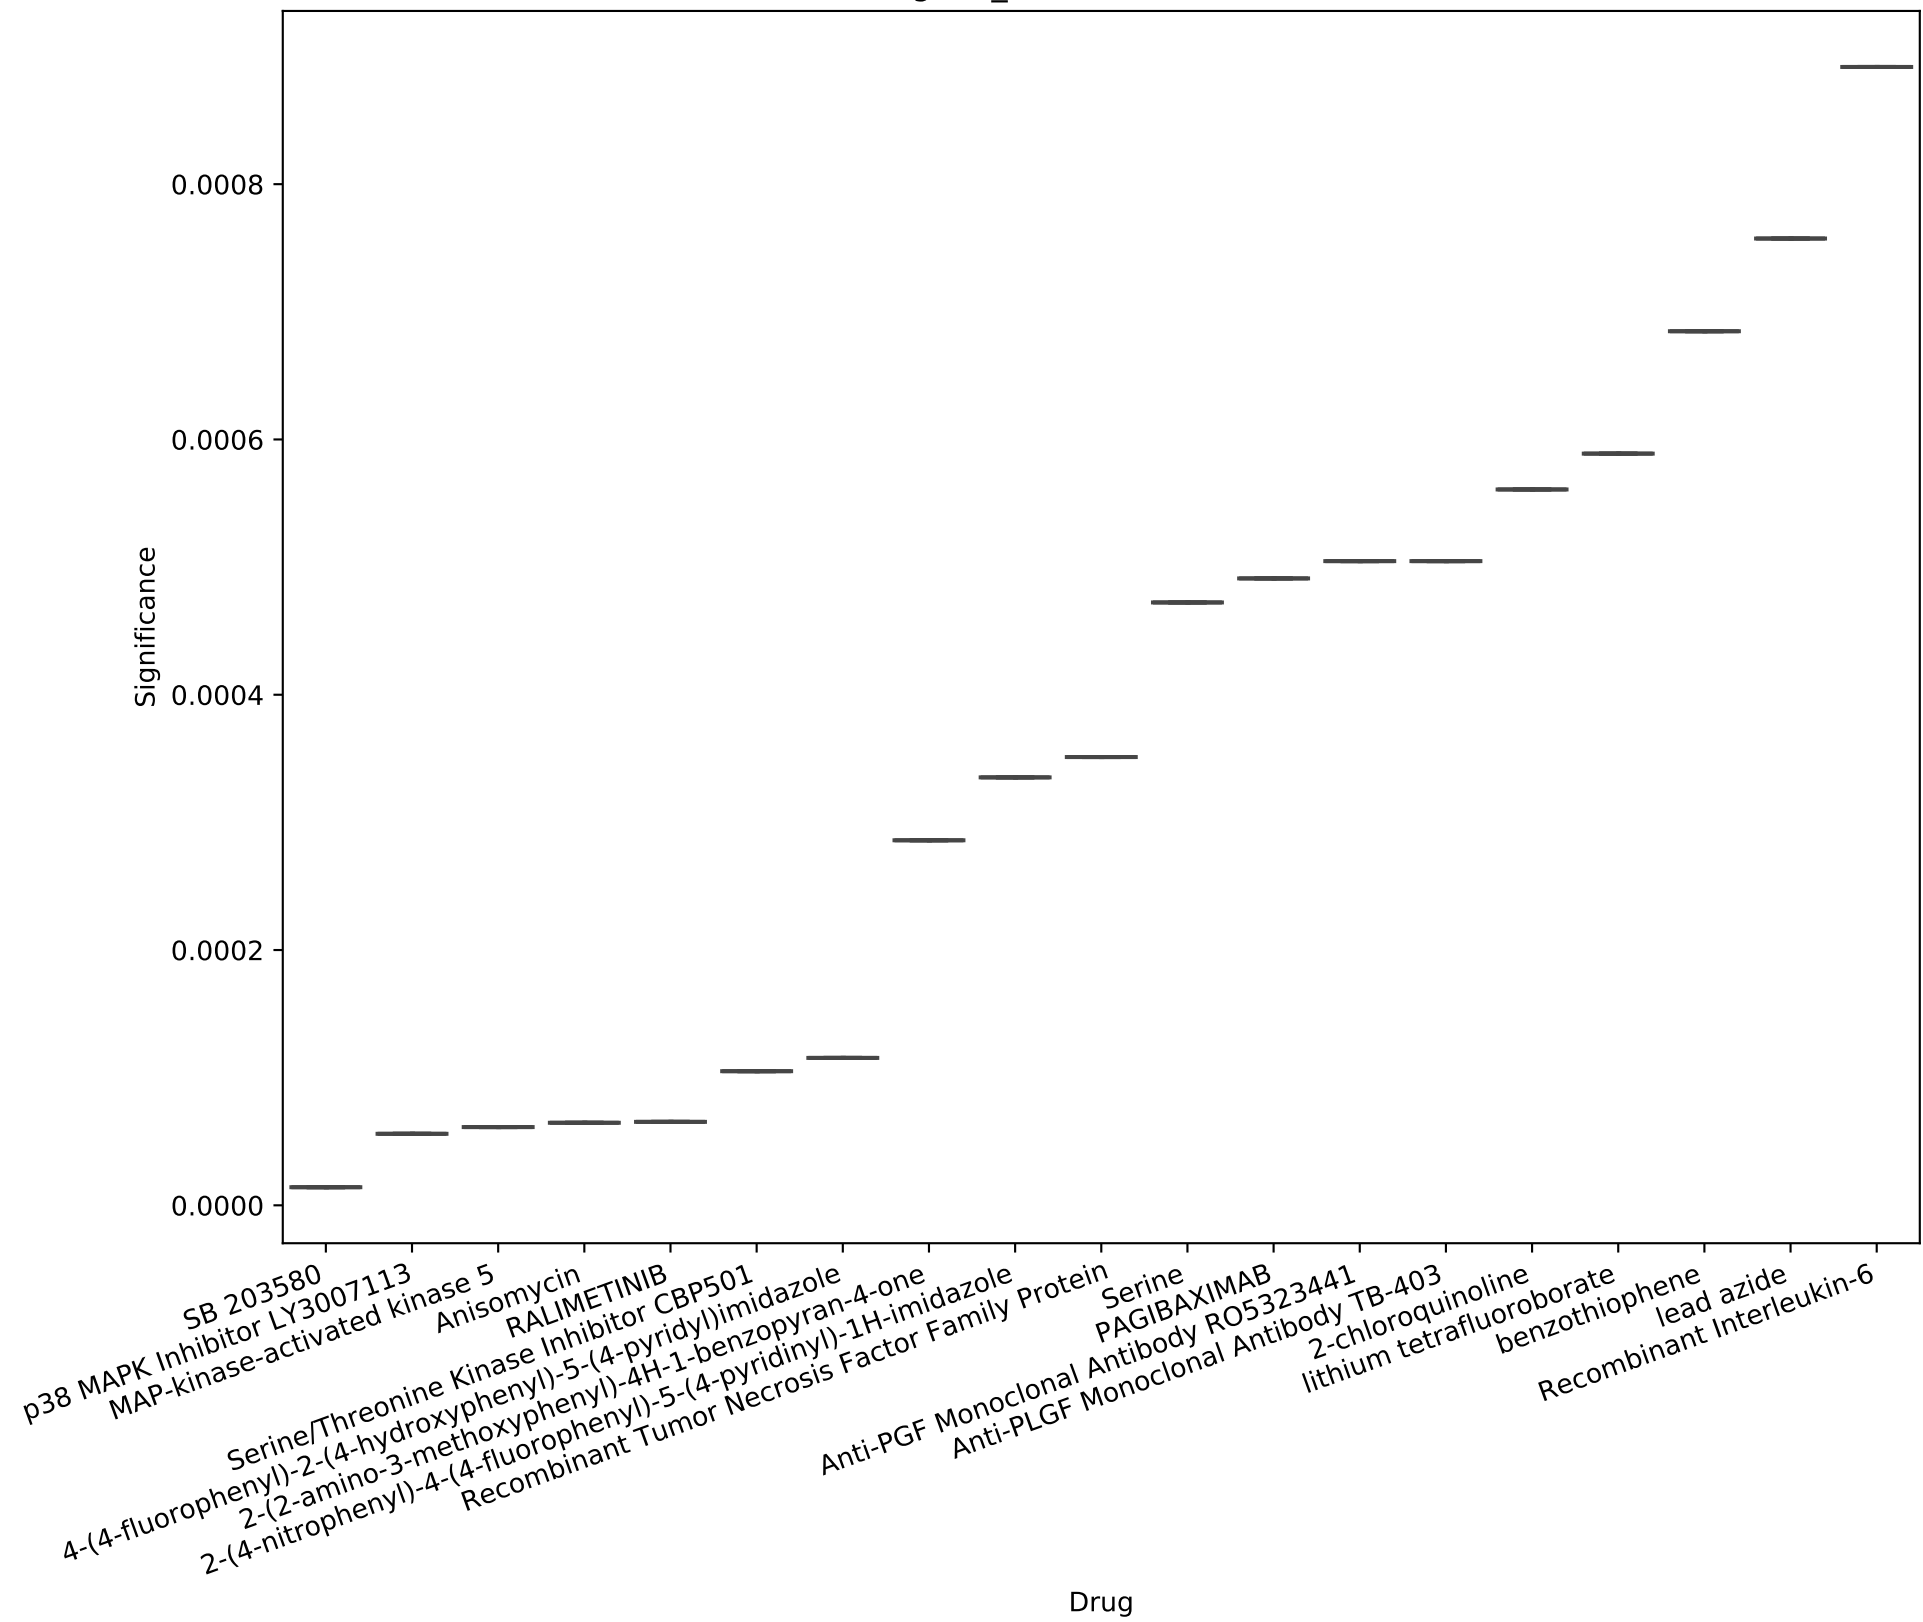

gene\_name: MX1

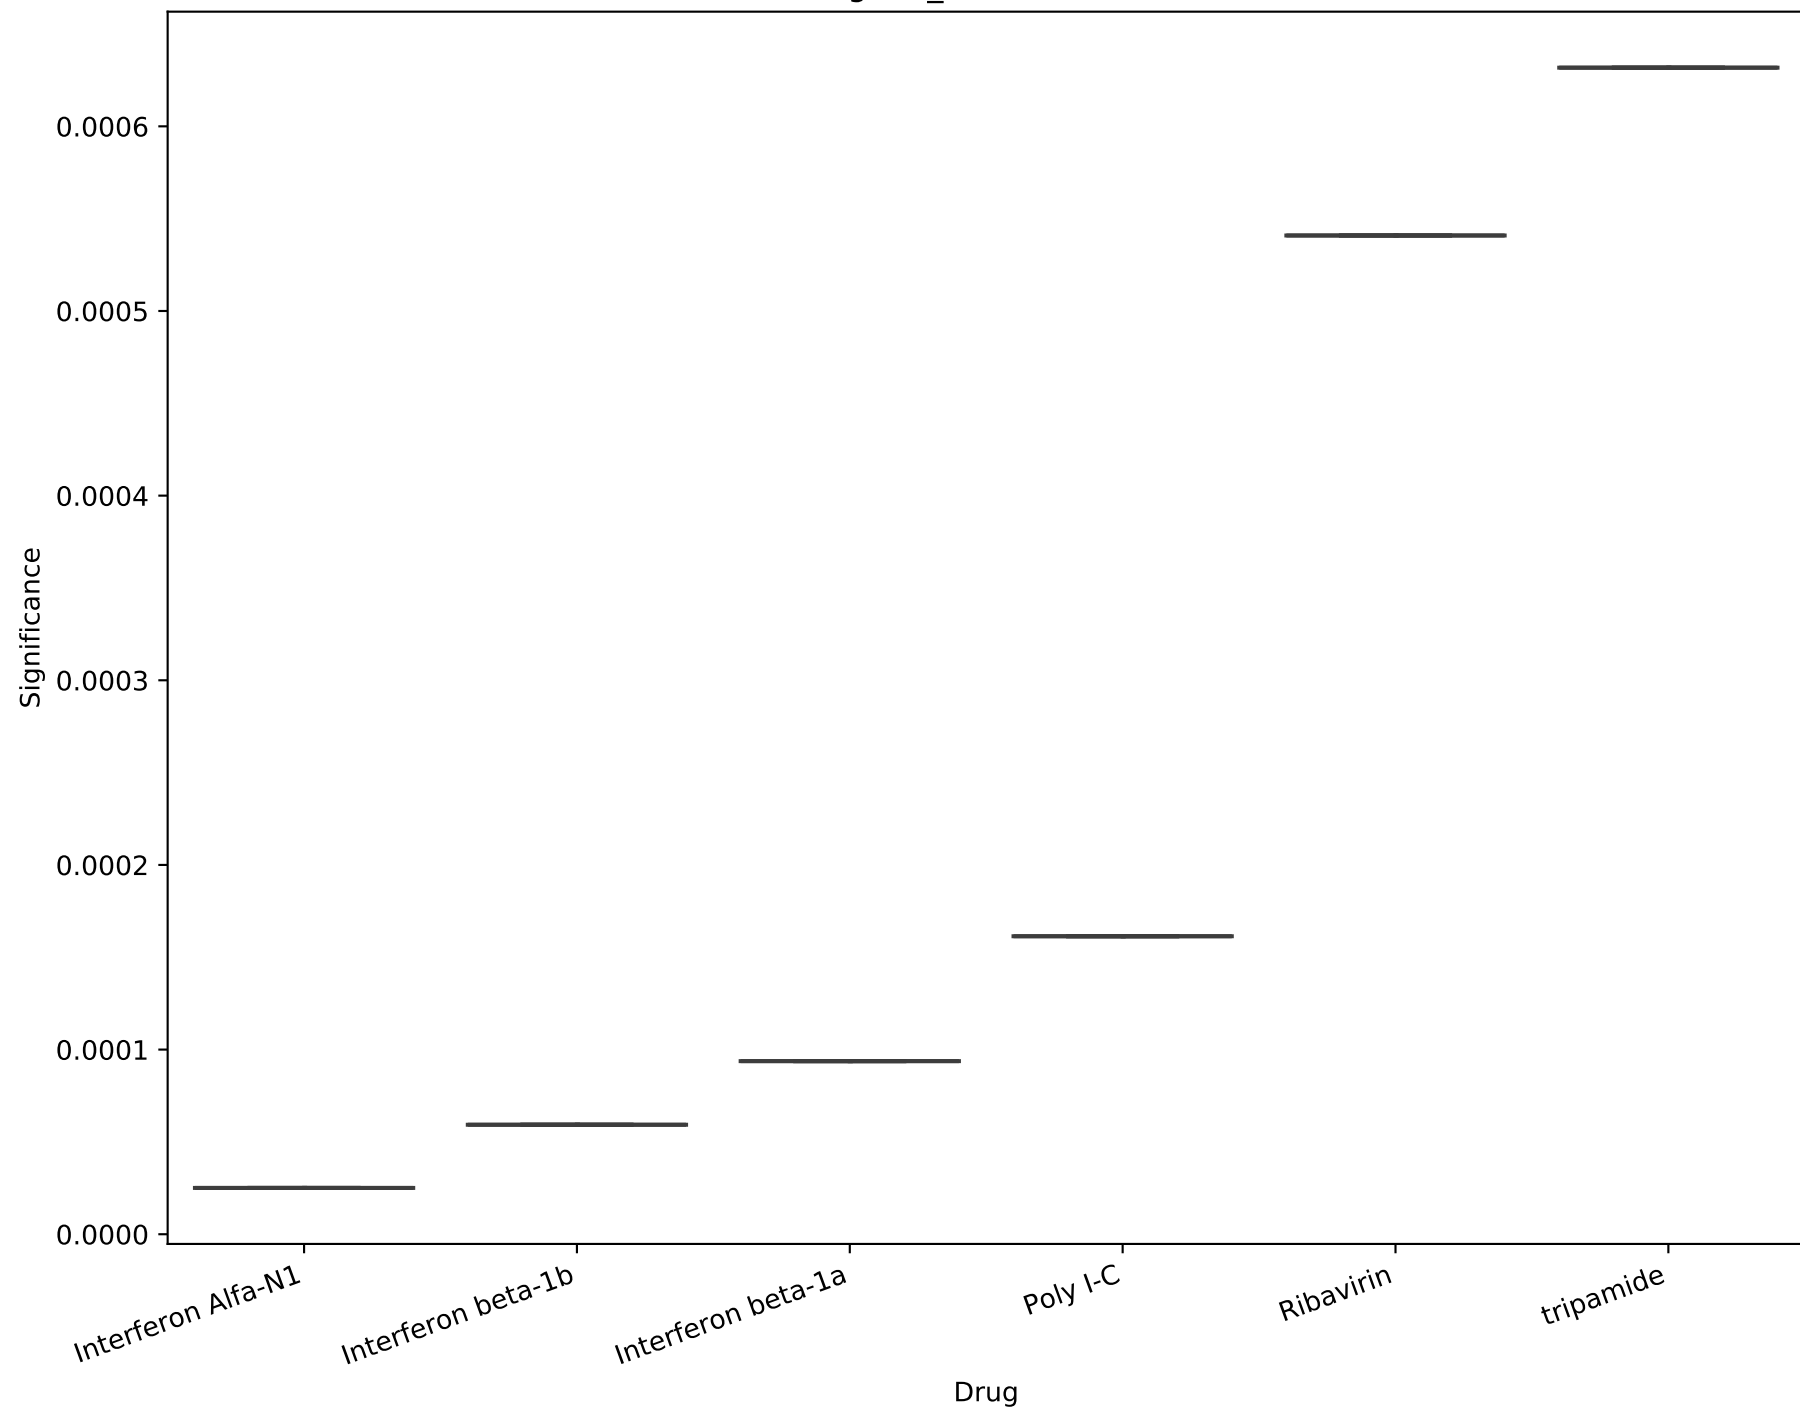



gene\_name: NUP37

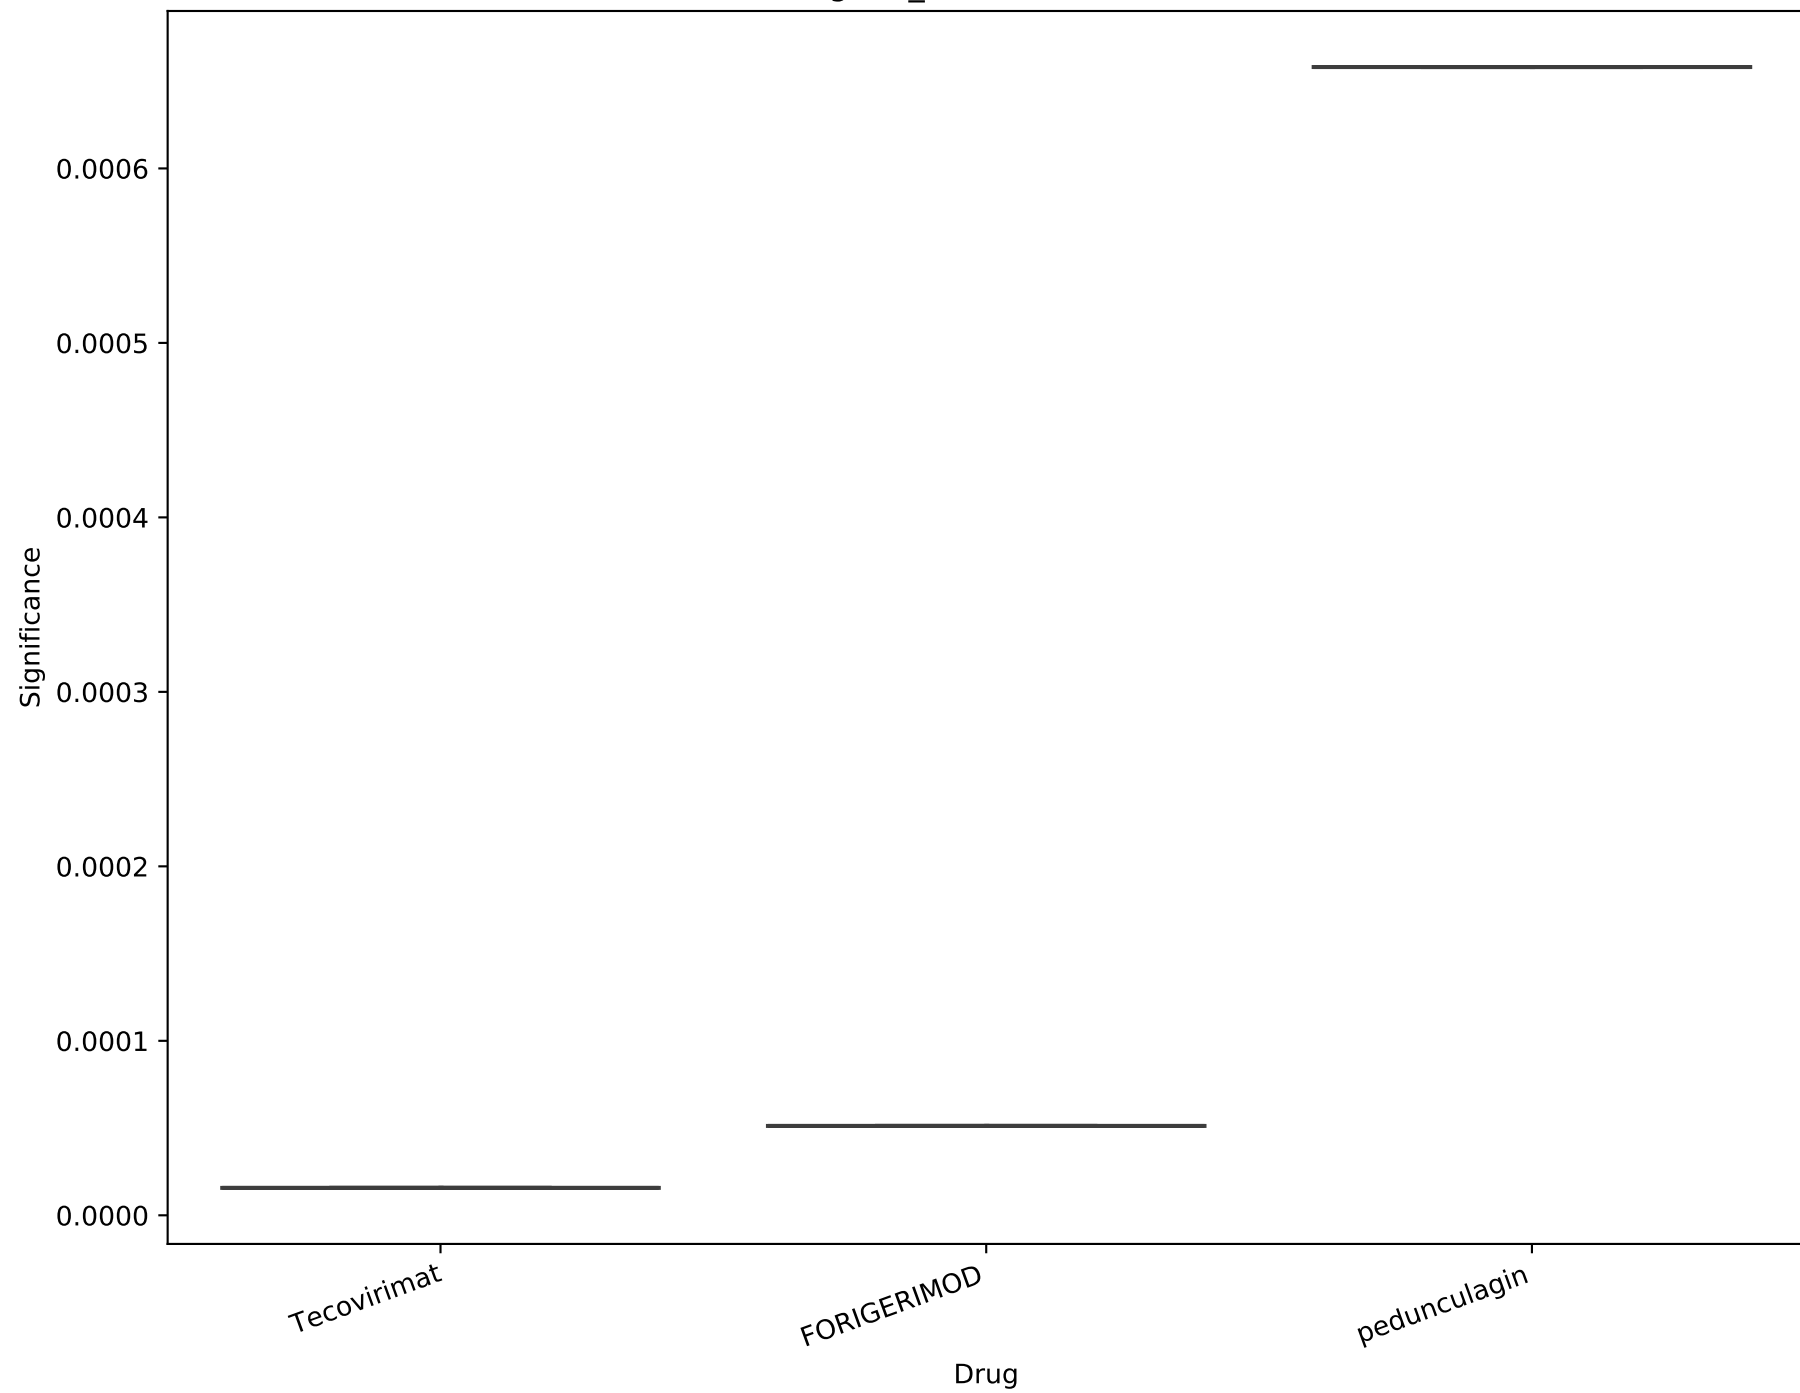

gene\_name: OCM

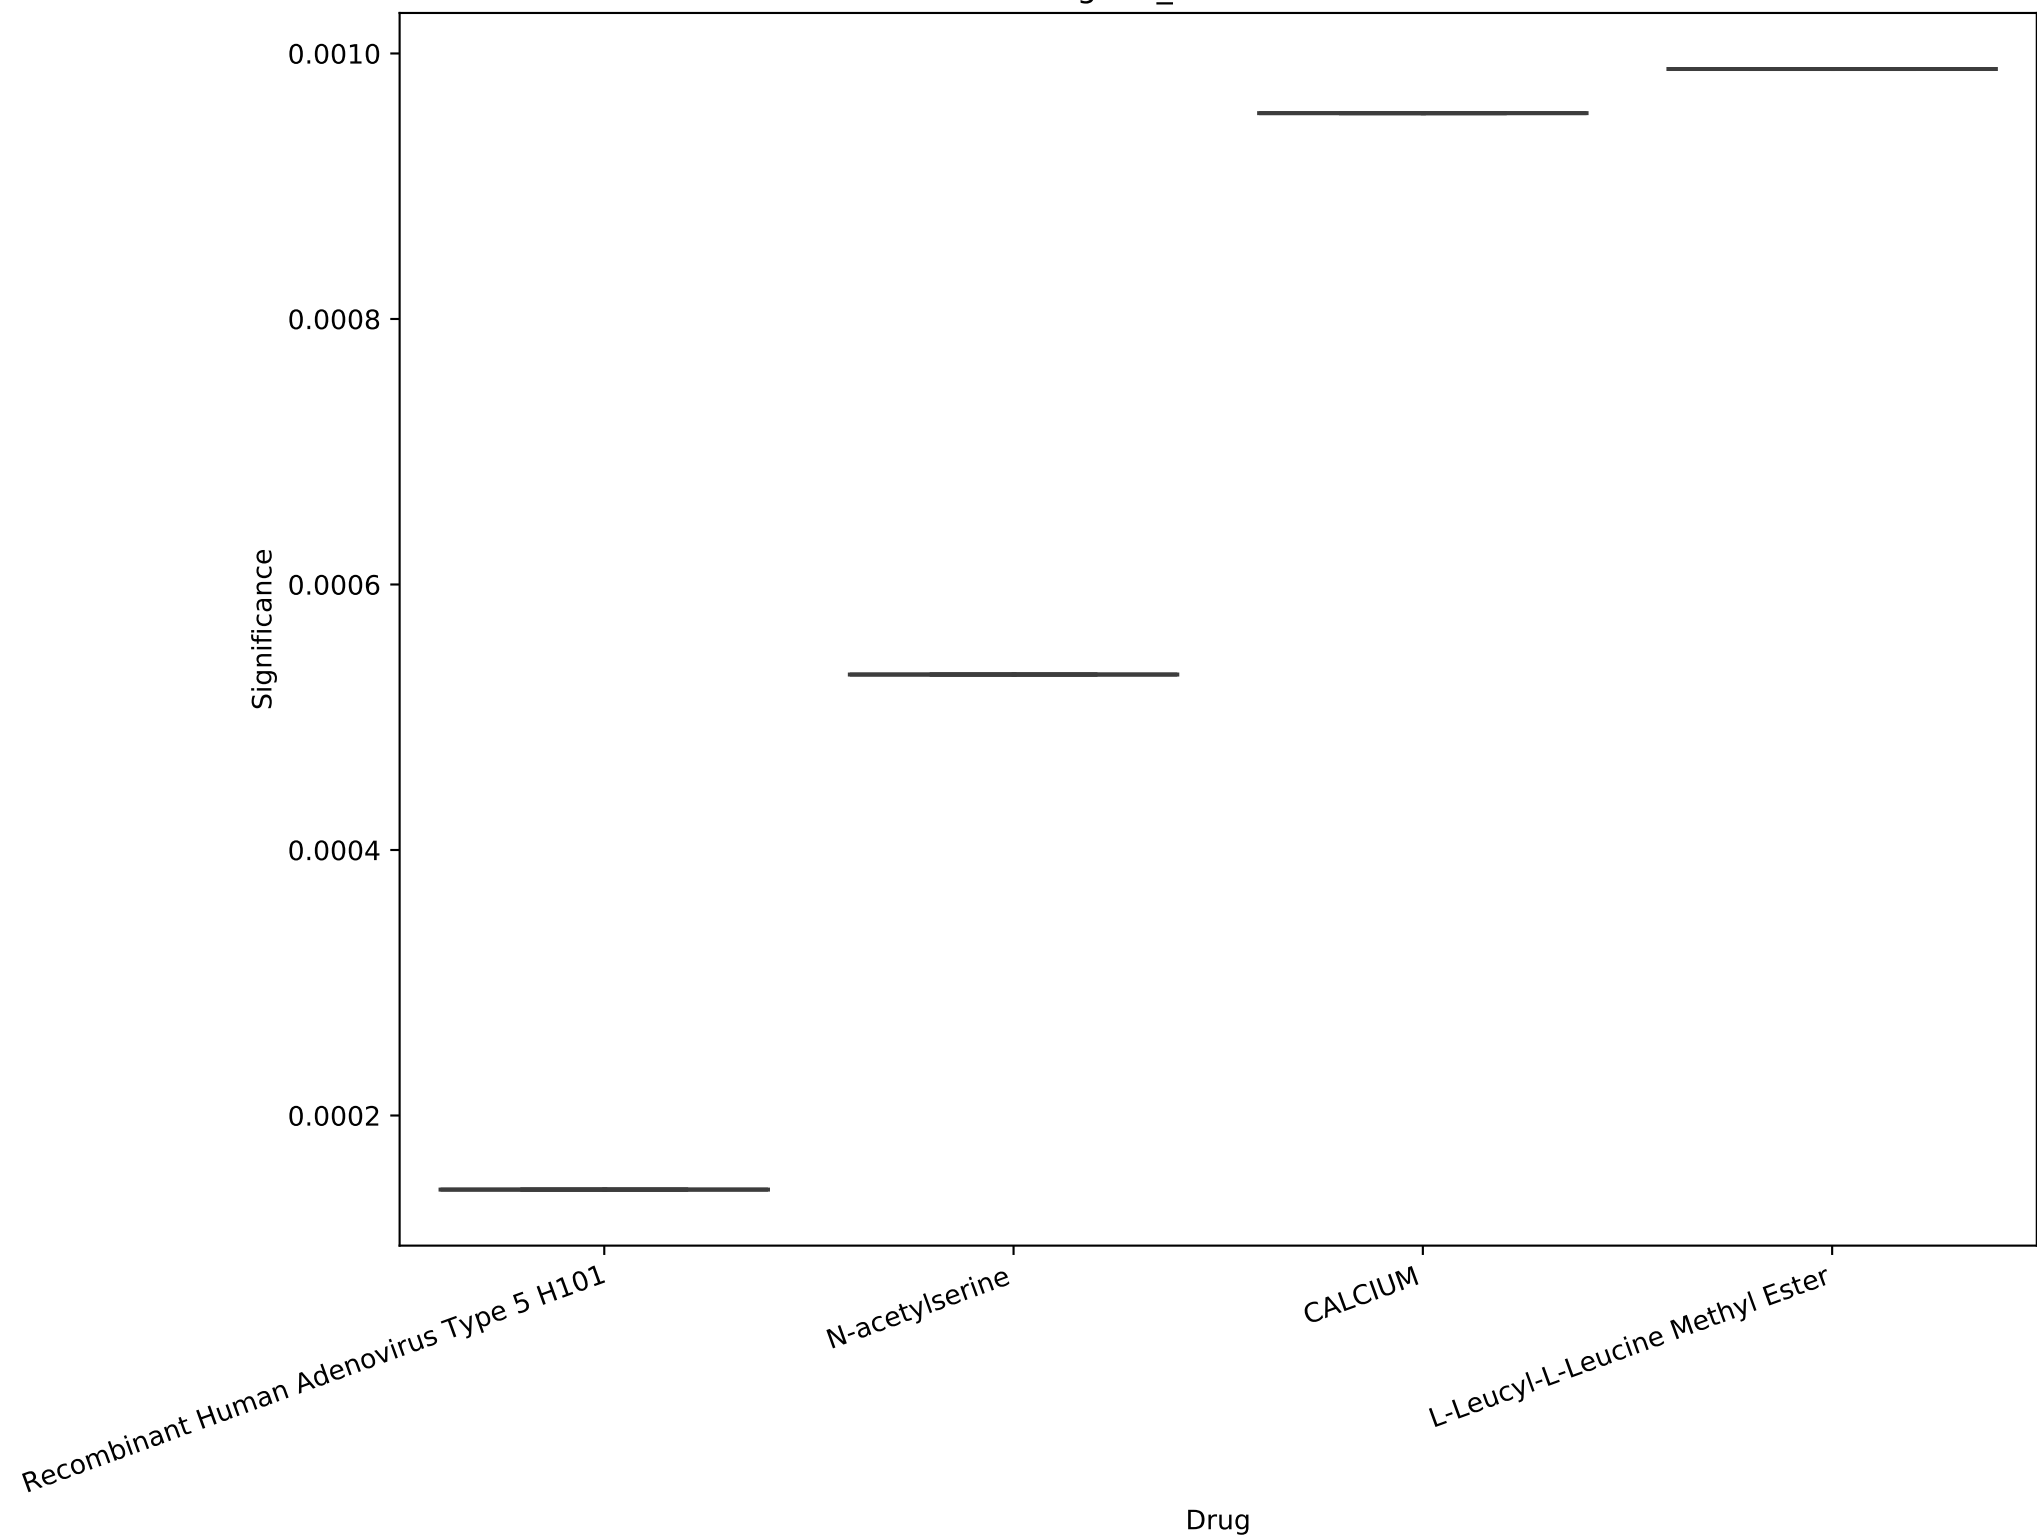

gene\_name: PSMA7

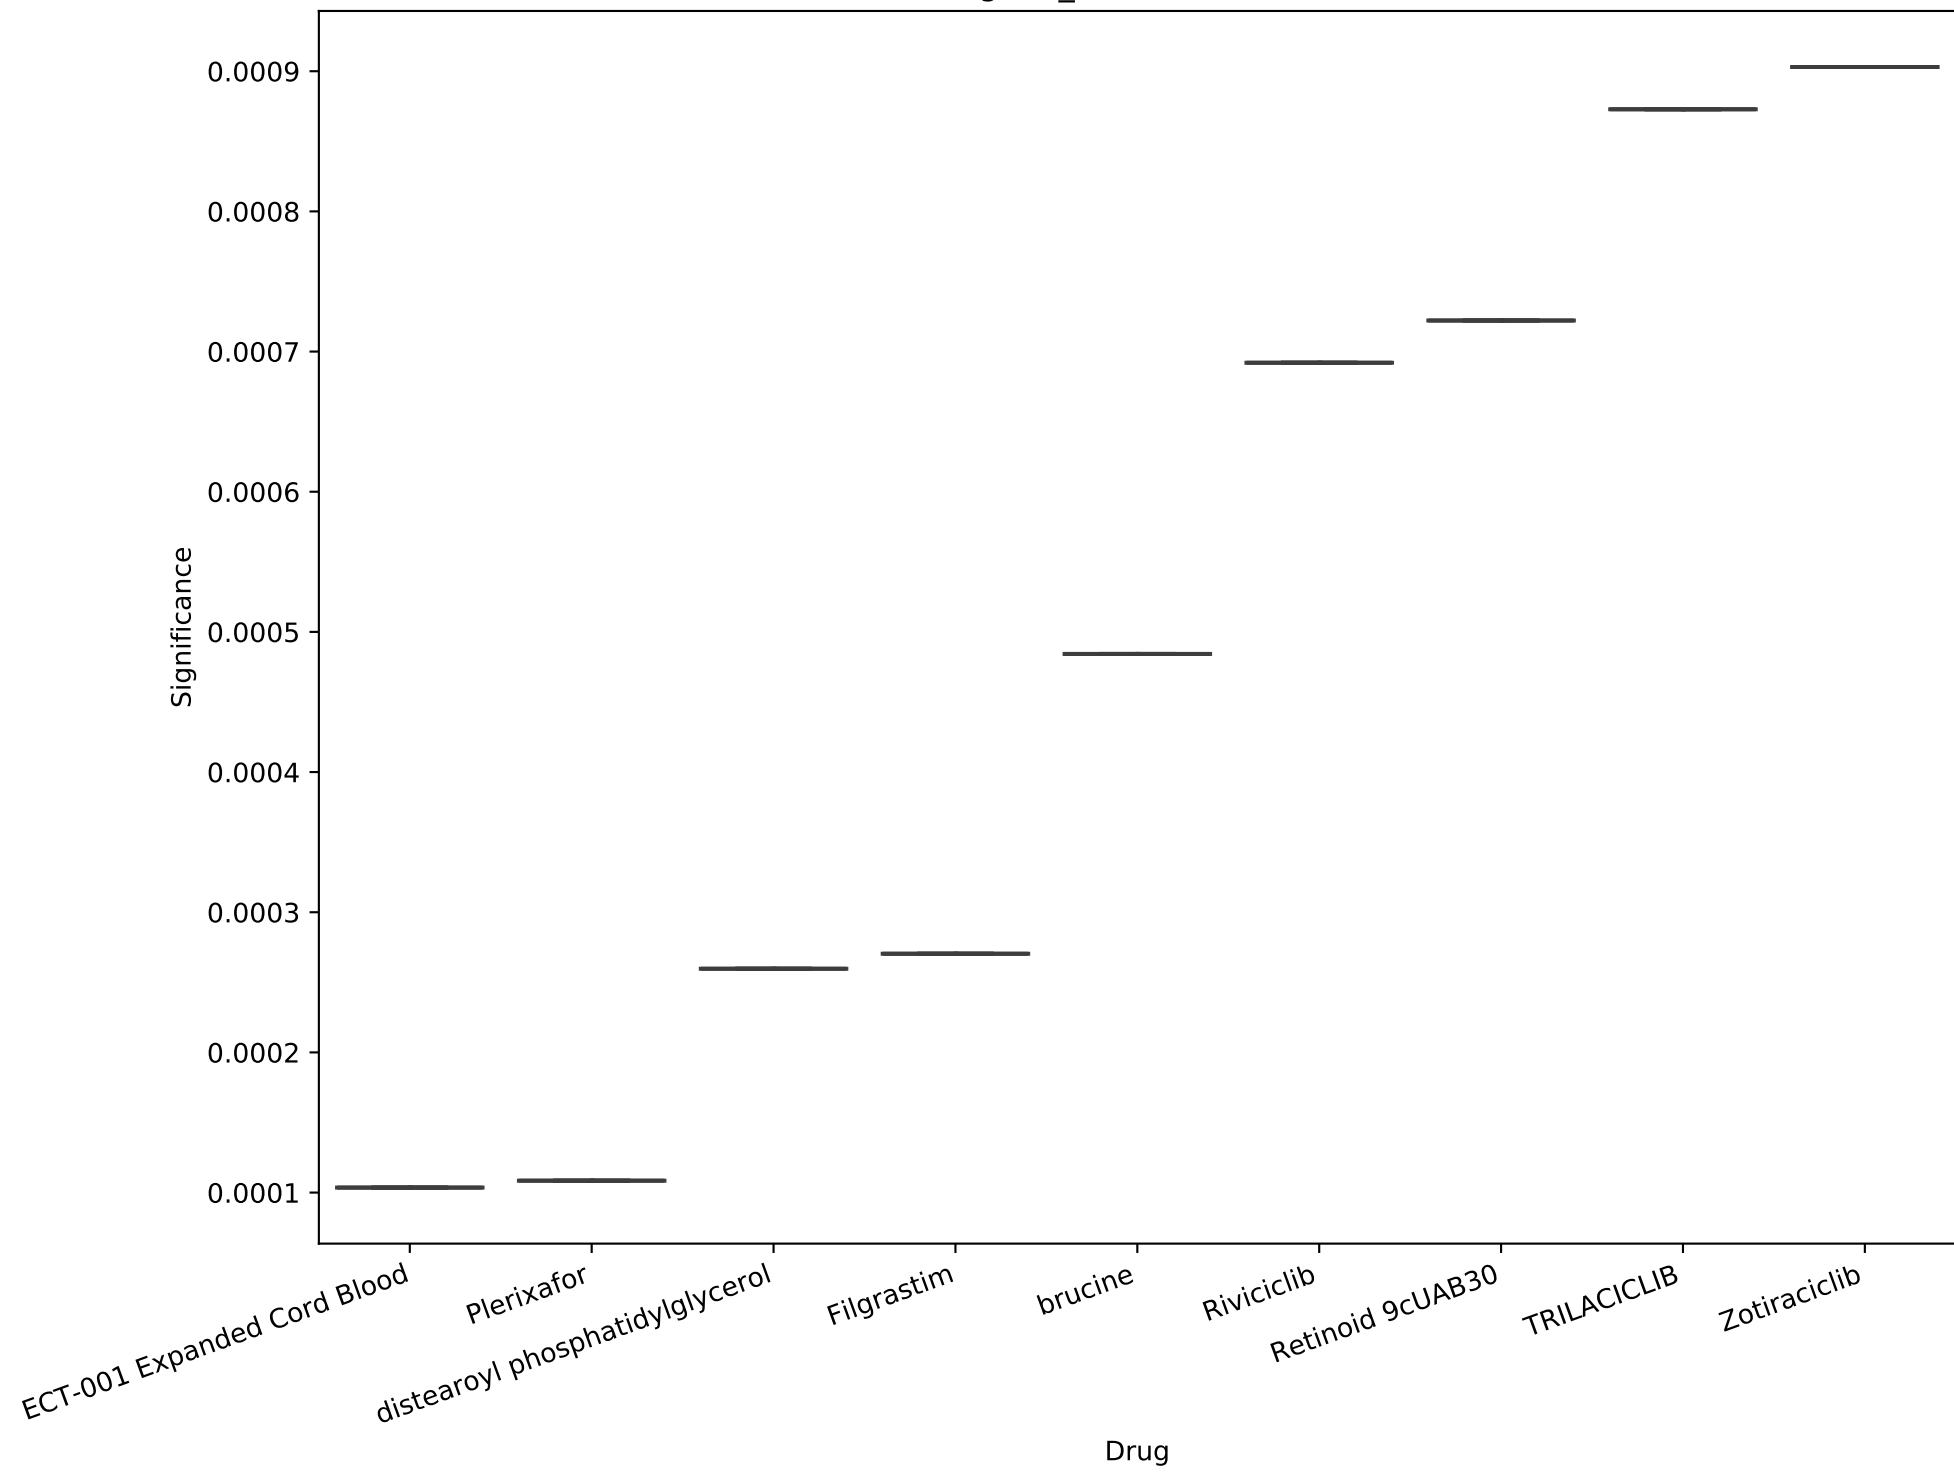

gene\_name: TKT

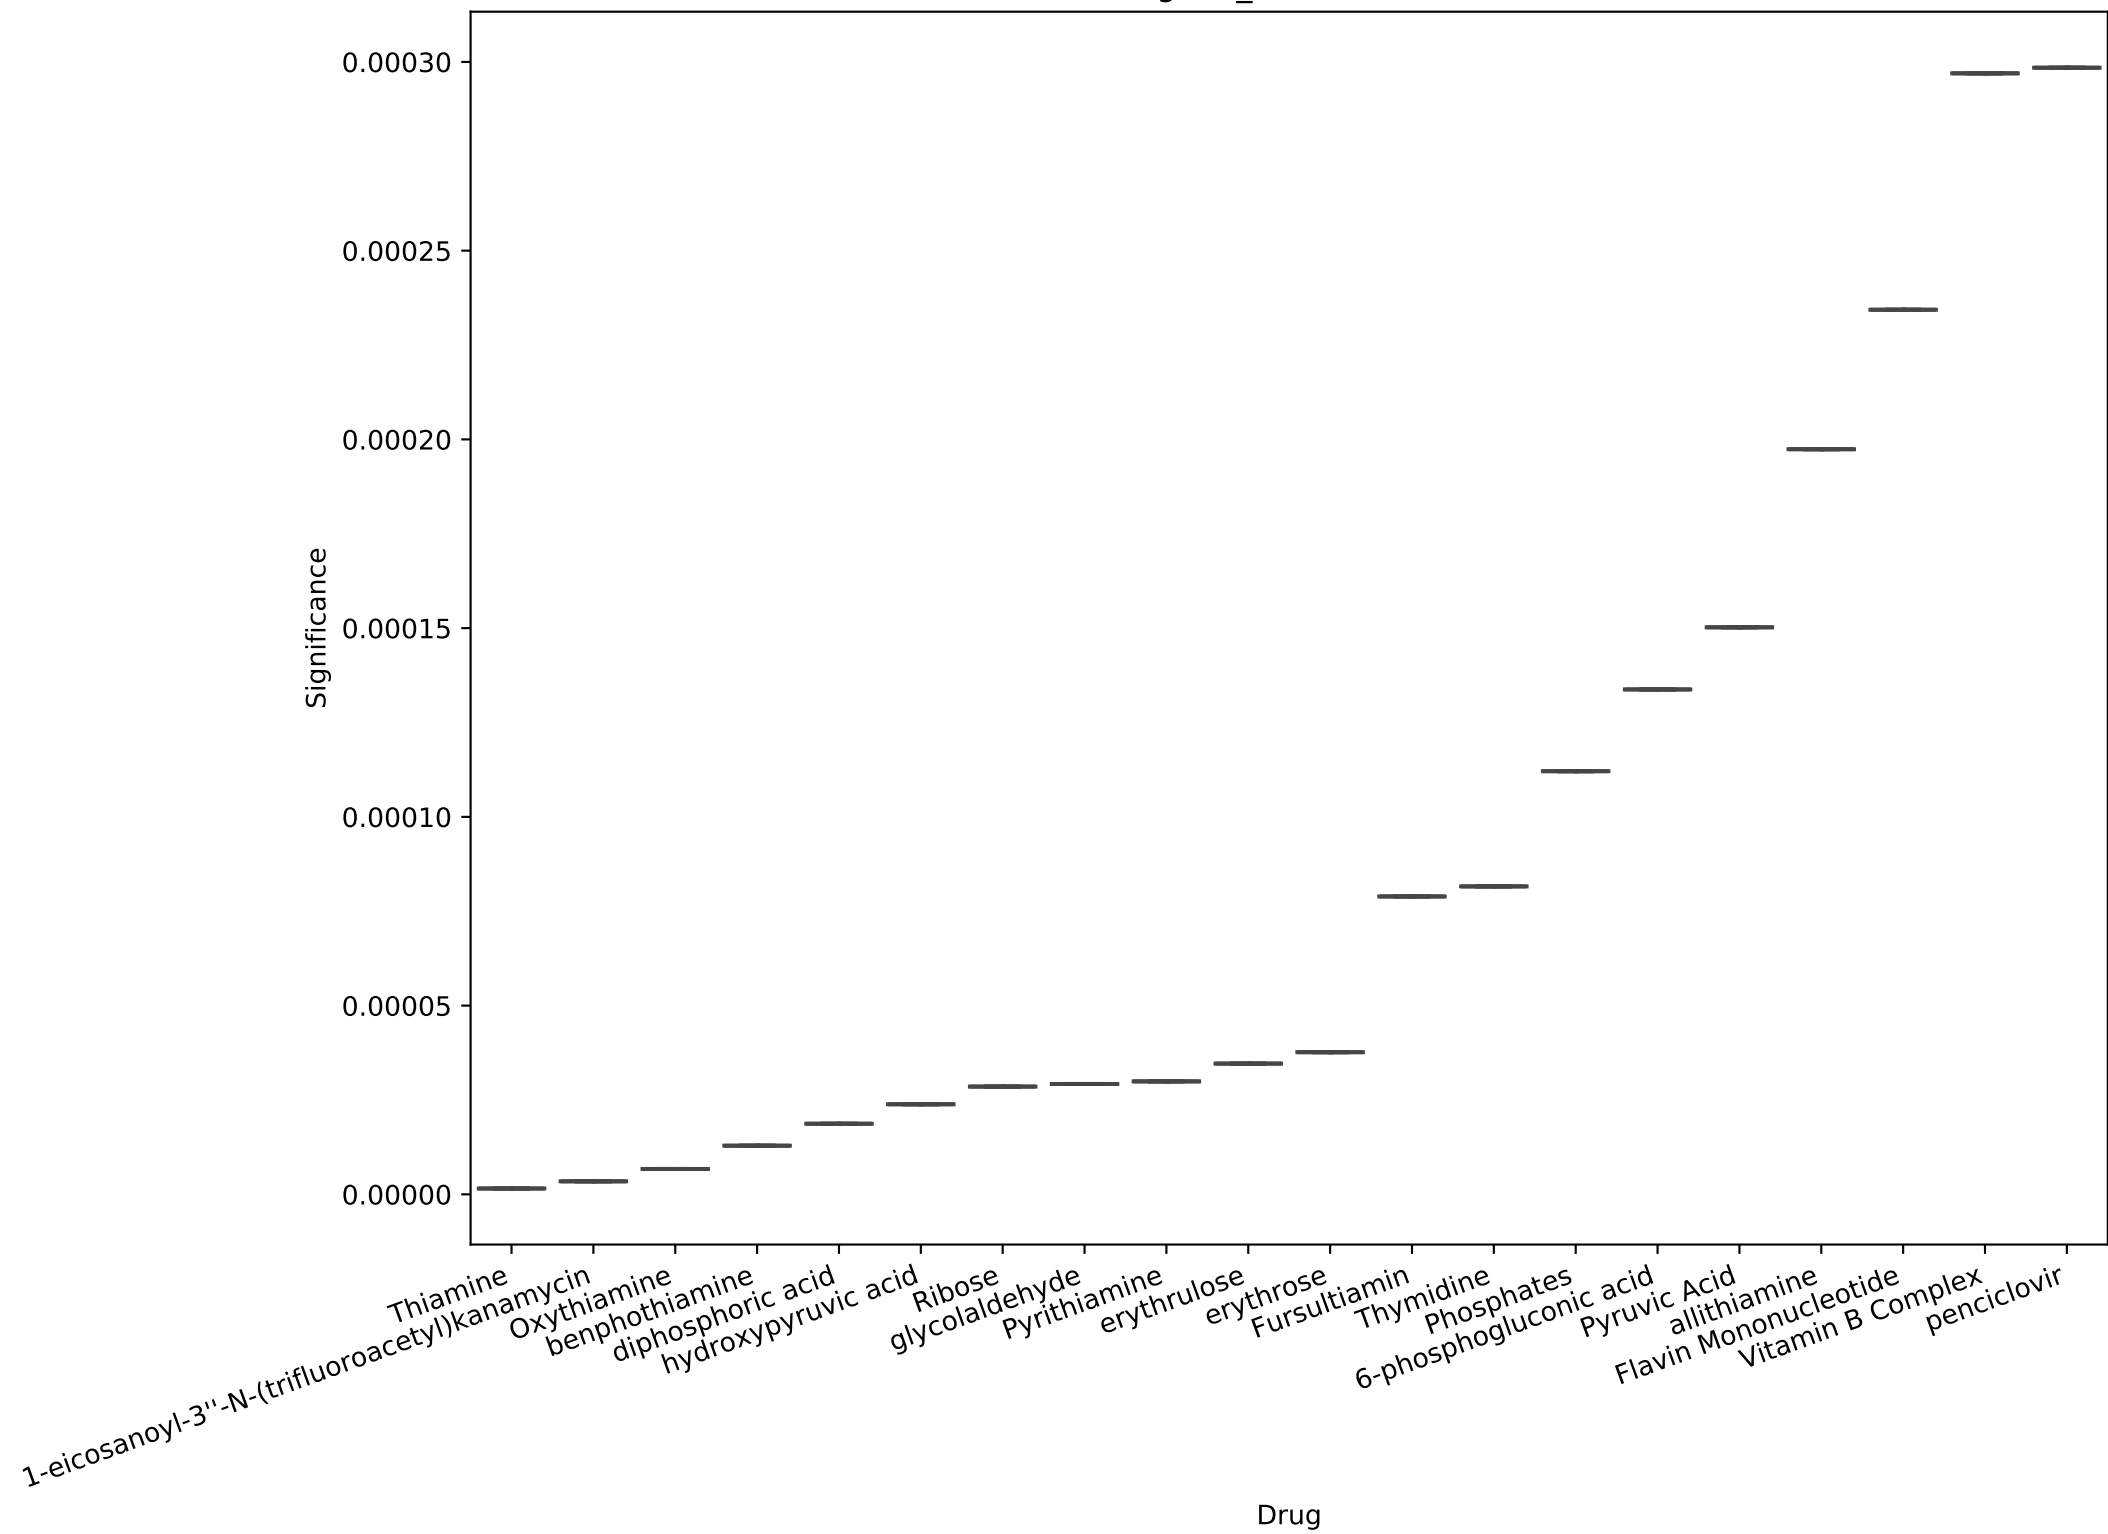

gene\_name: TM9SF2

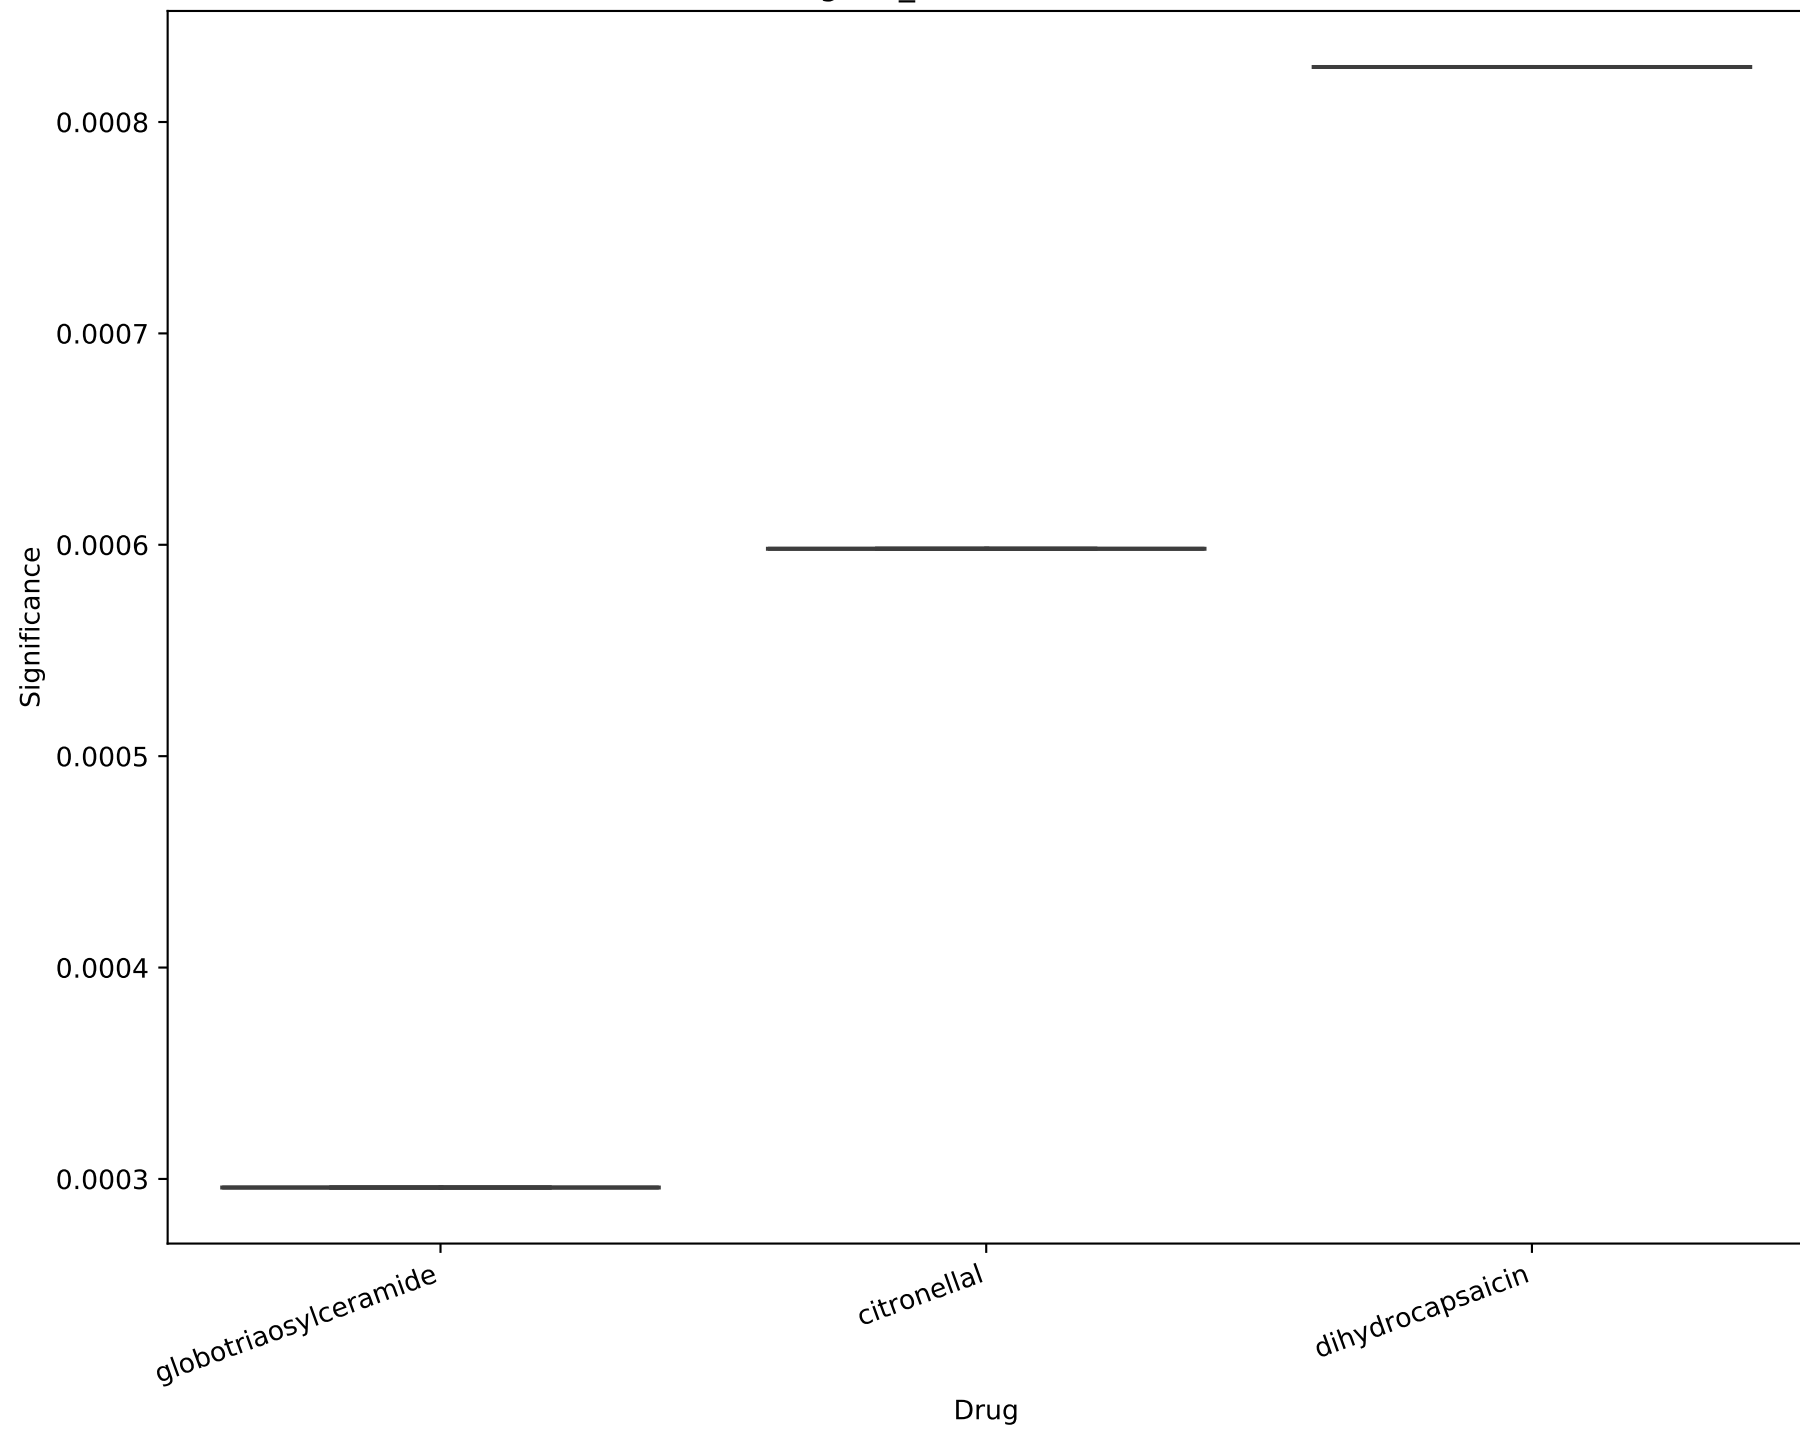

gene\_name: TMED10

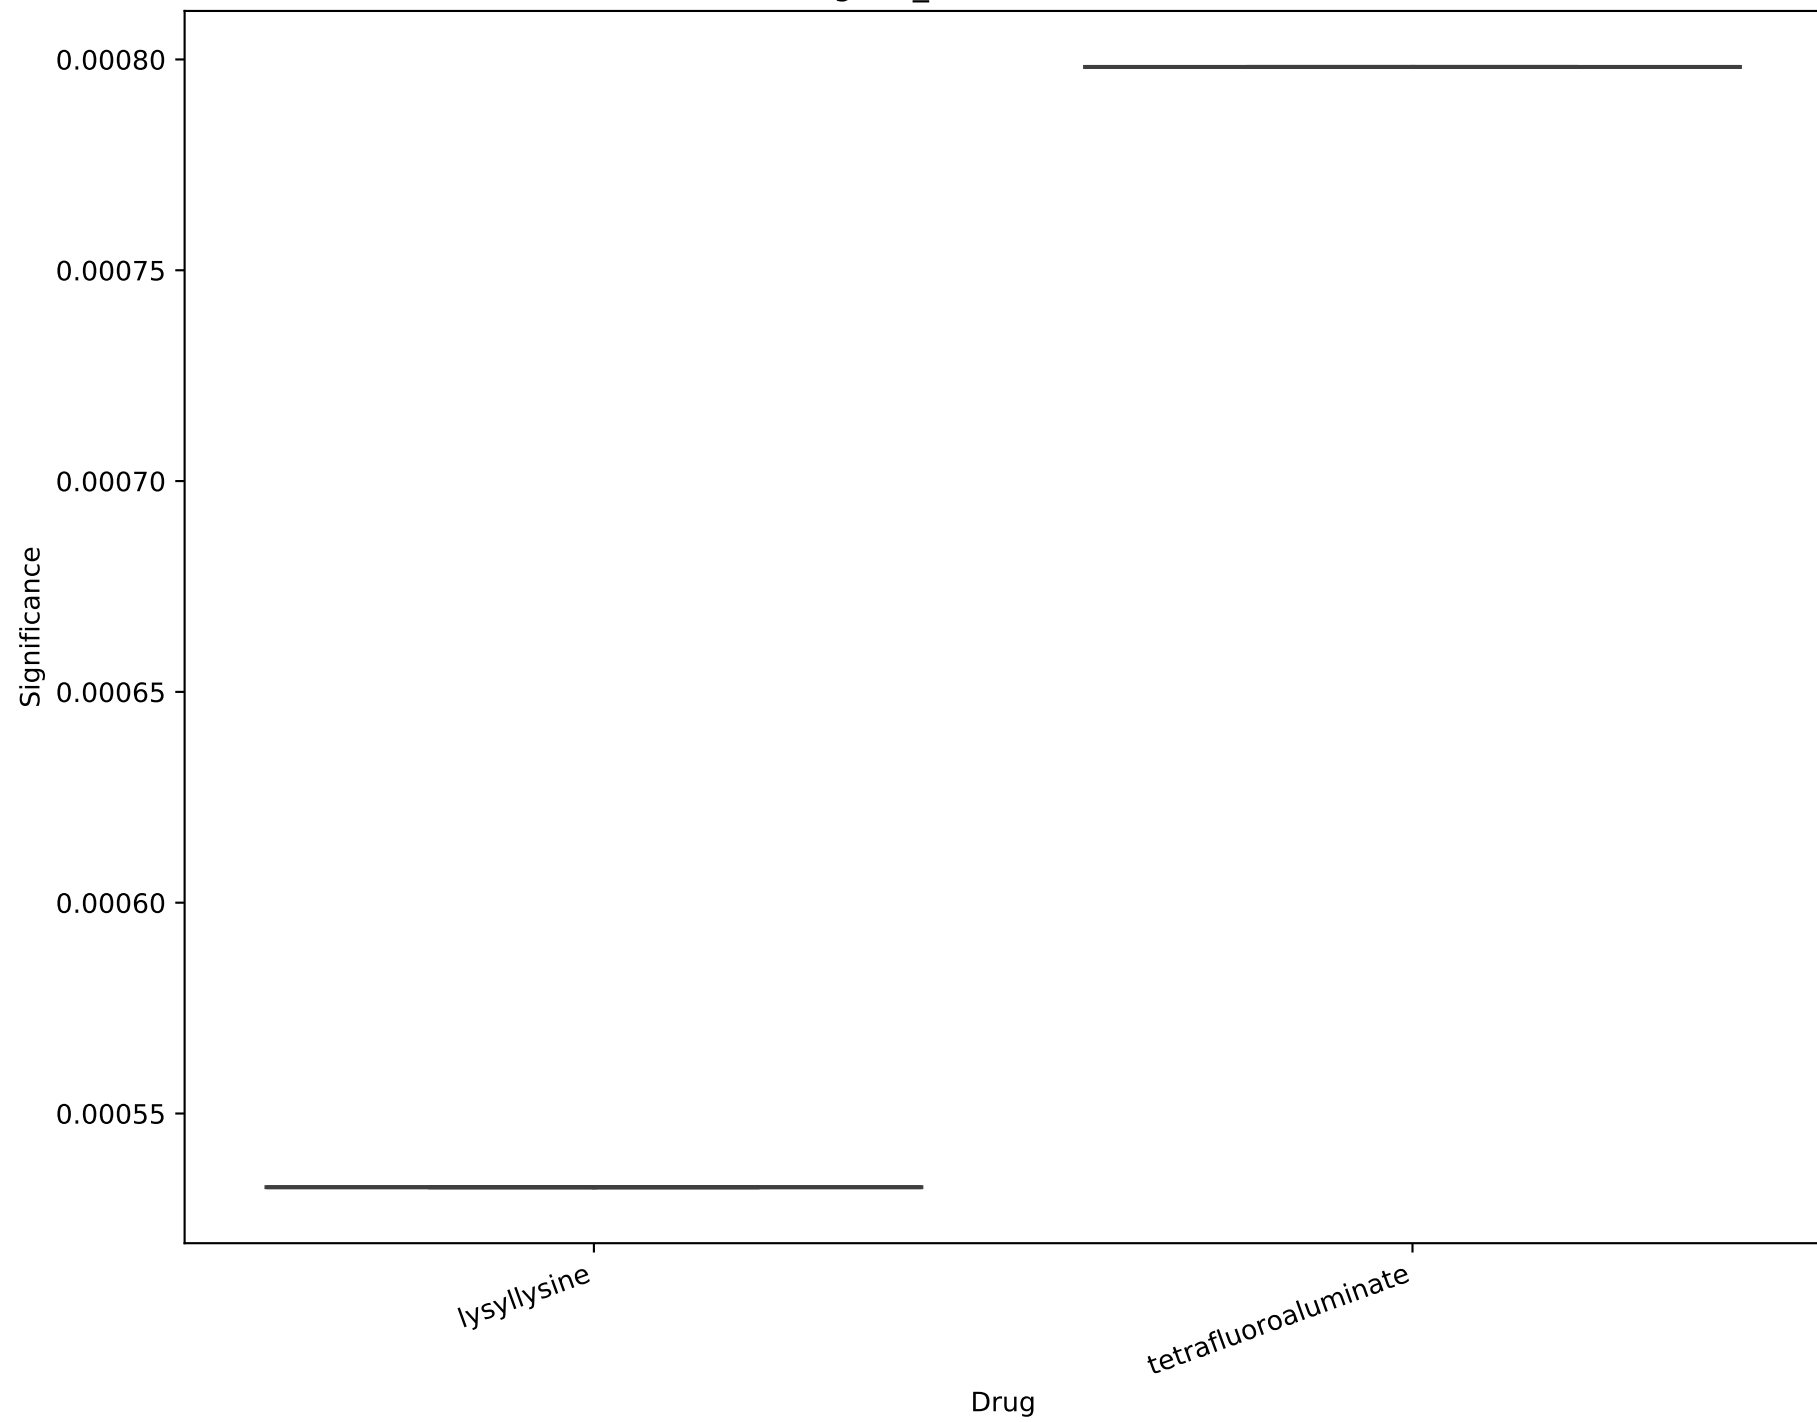

gene\_name: TWF2

Significance

3-mercaptopyruvic acid

phosphoglycolate

Cibacron Blue F 3GA

benzoylarginine ethyl ester

cyanuric chloride

Drug

0.00030

0.00025

0.00020

0.00015

0.00010

gene\_name: UBXN2B

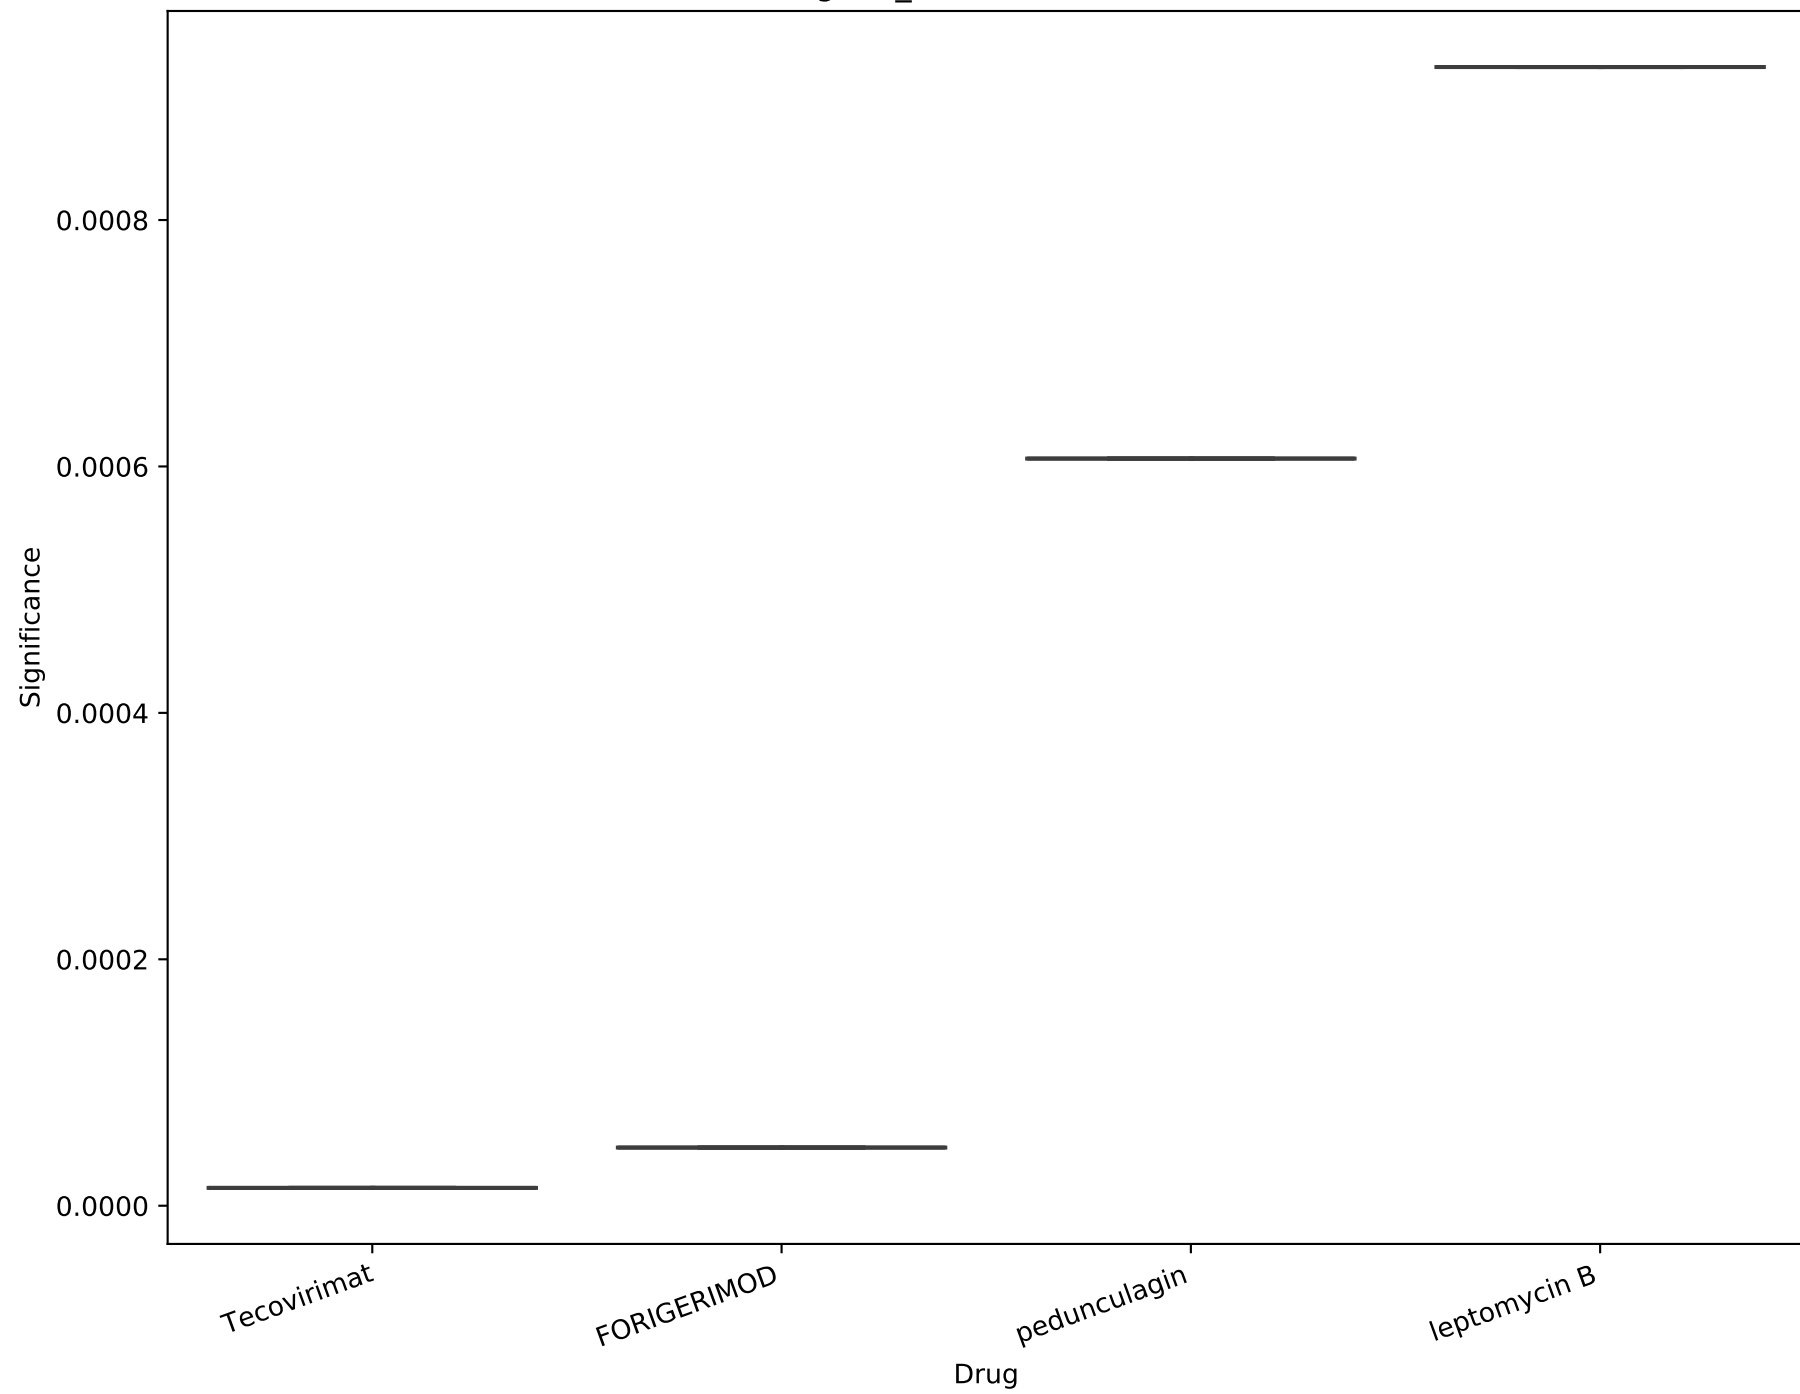



gene\_name: UNG

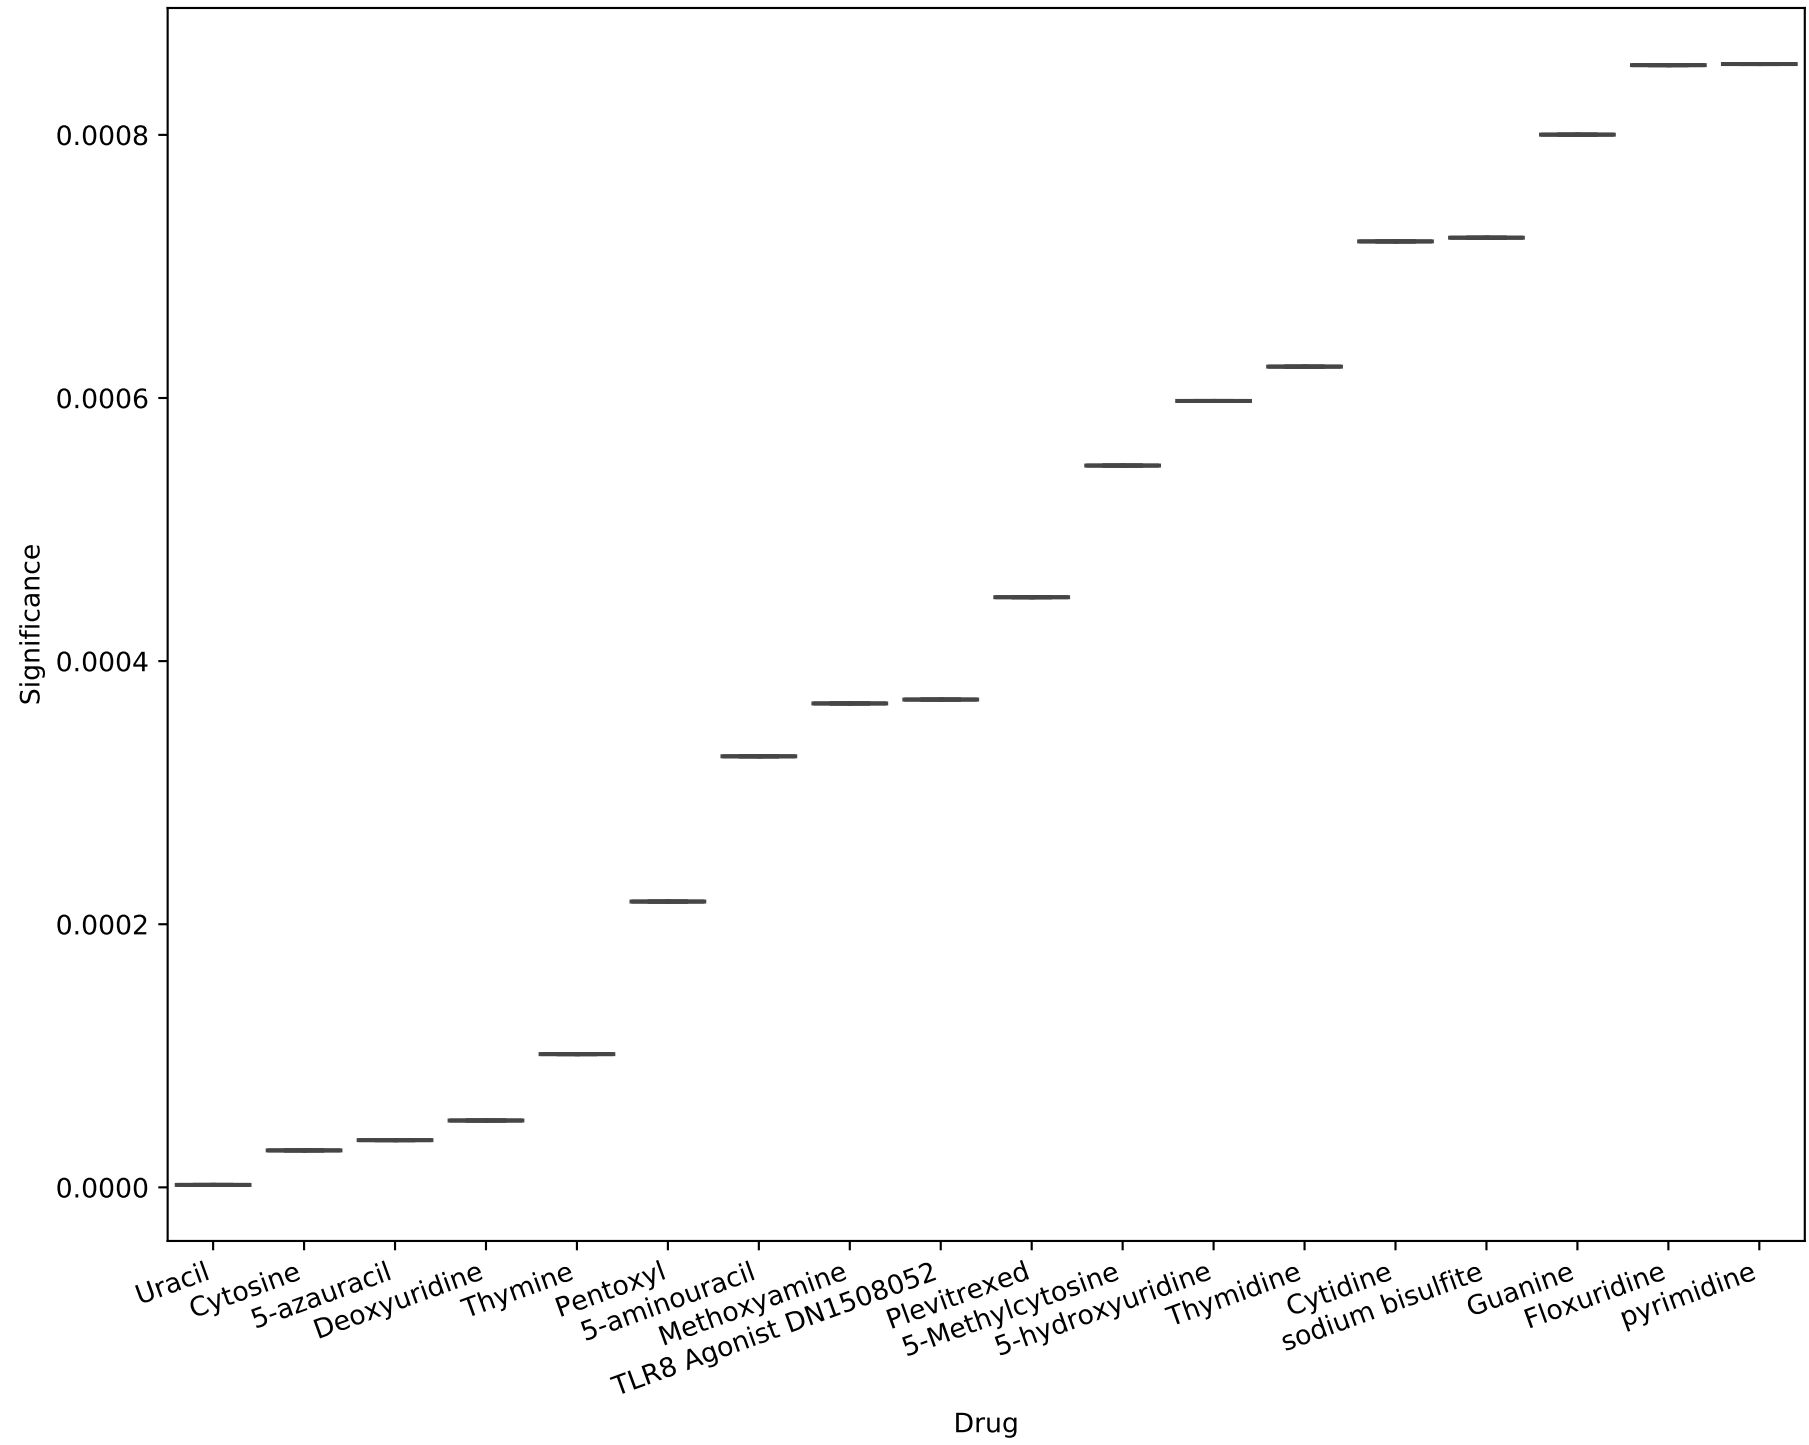

gene\_name: VPS51

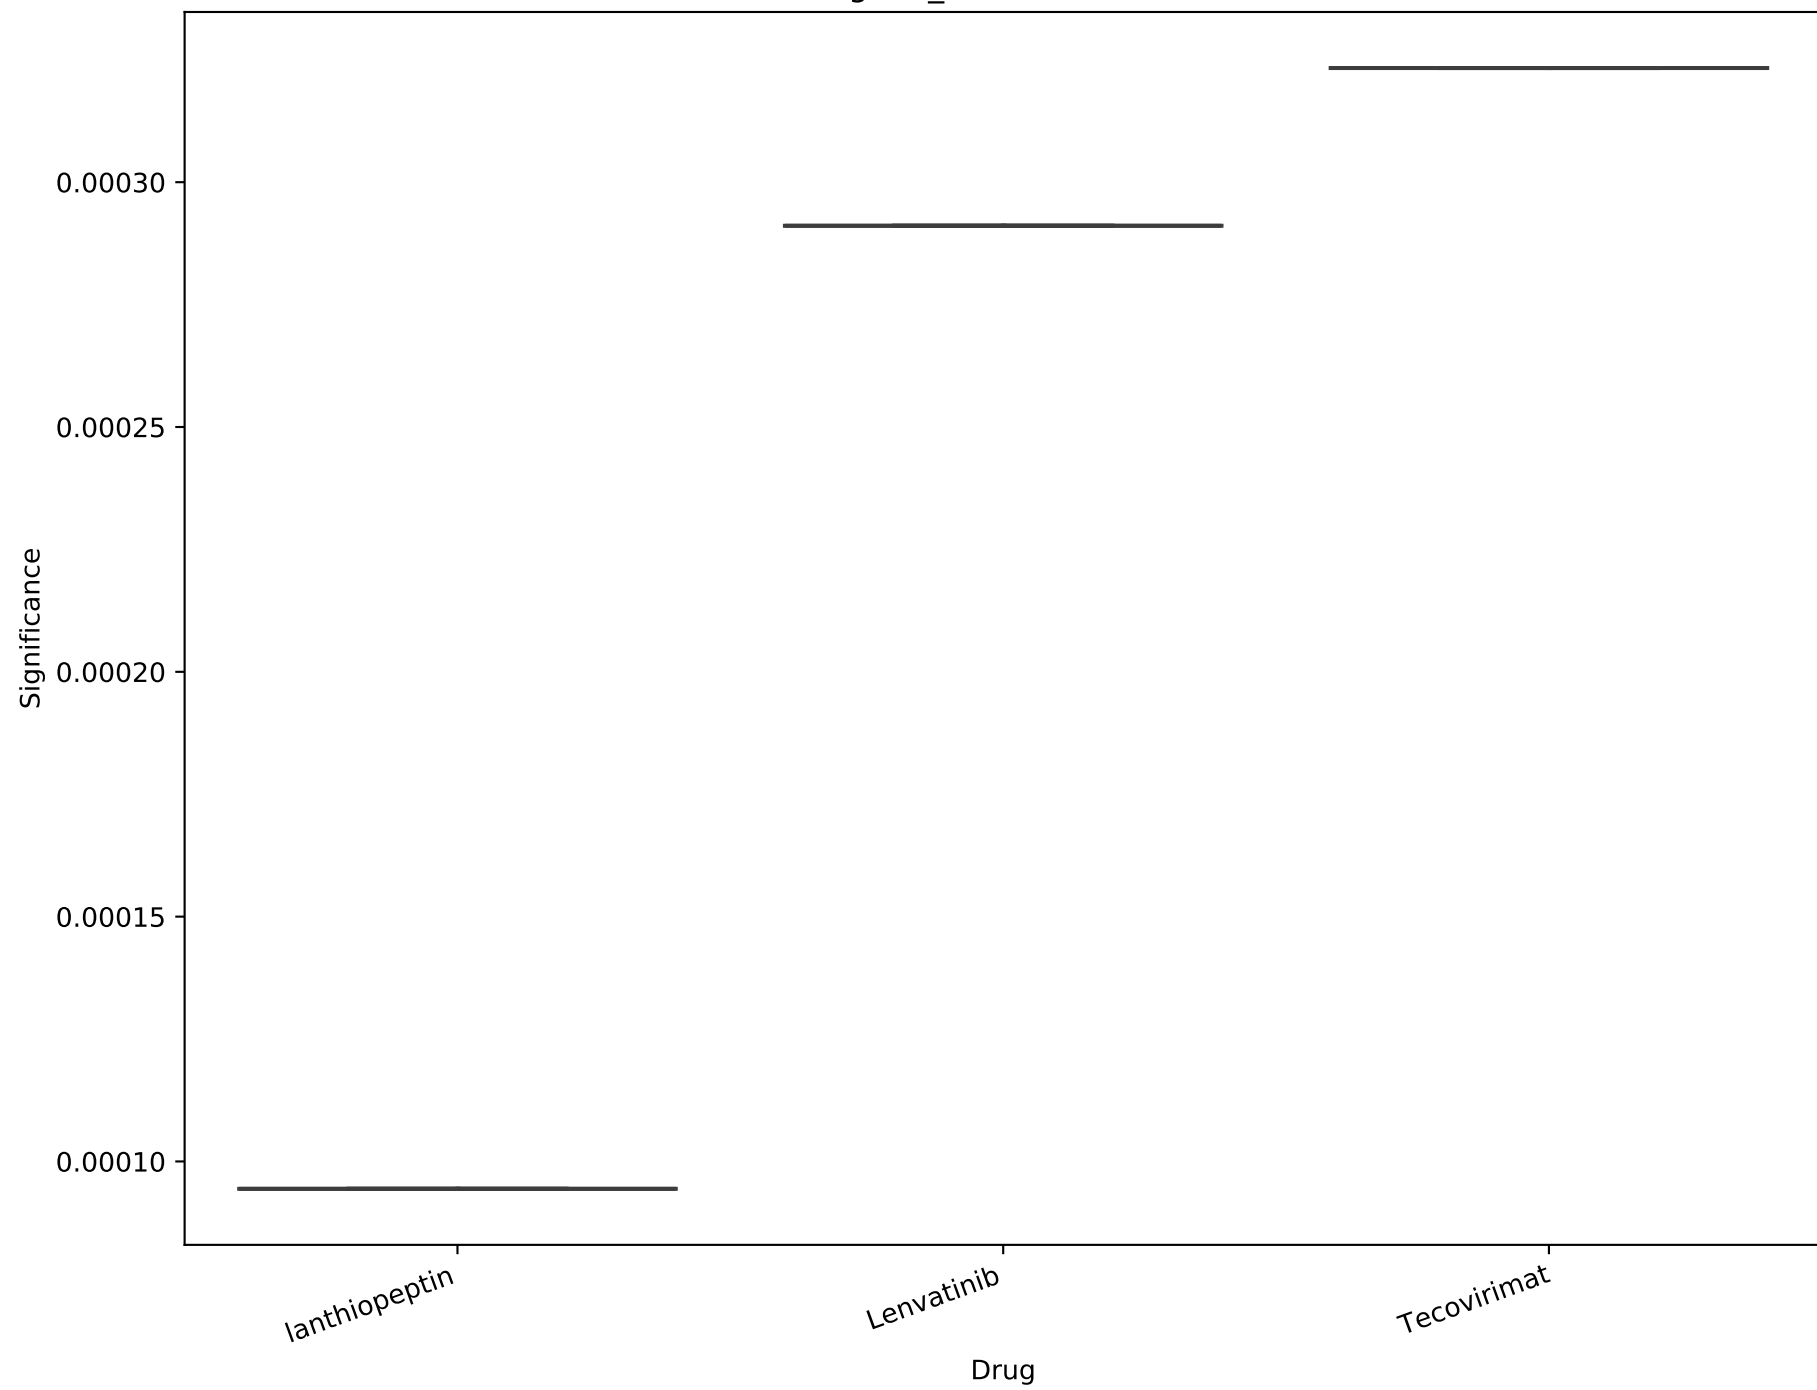

gene\_name: VPS52

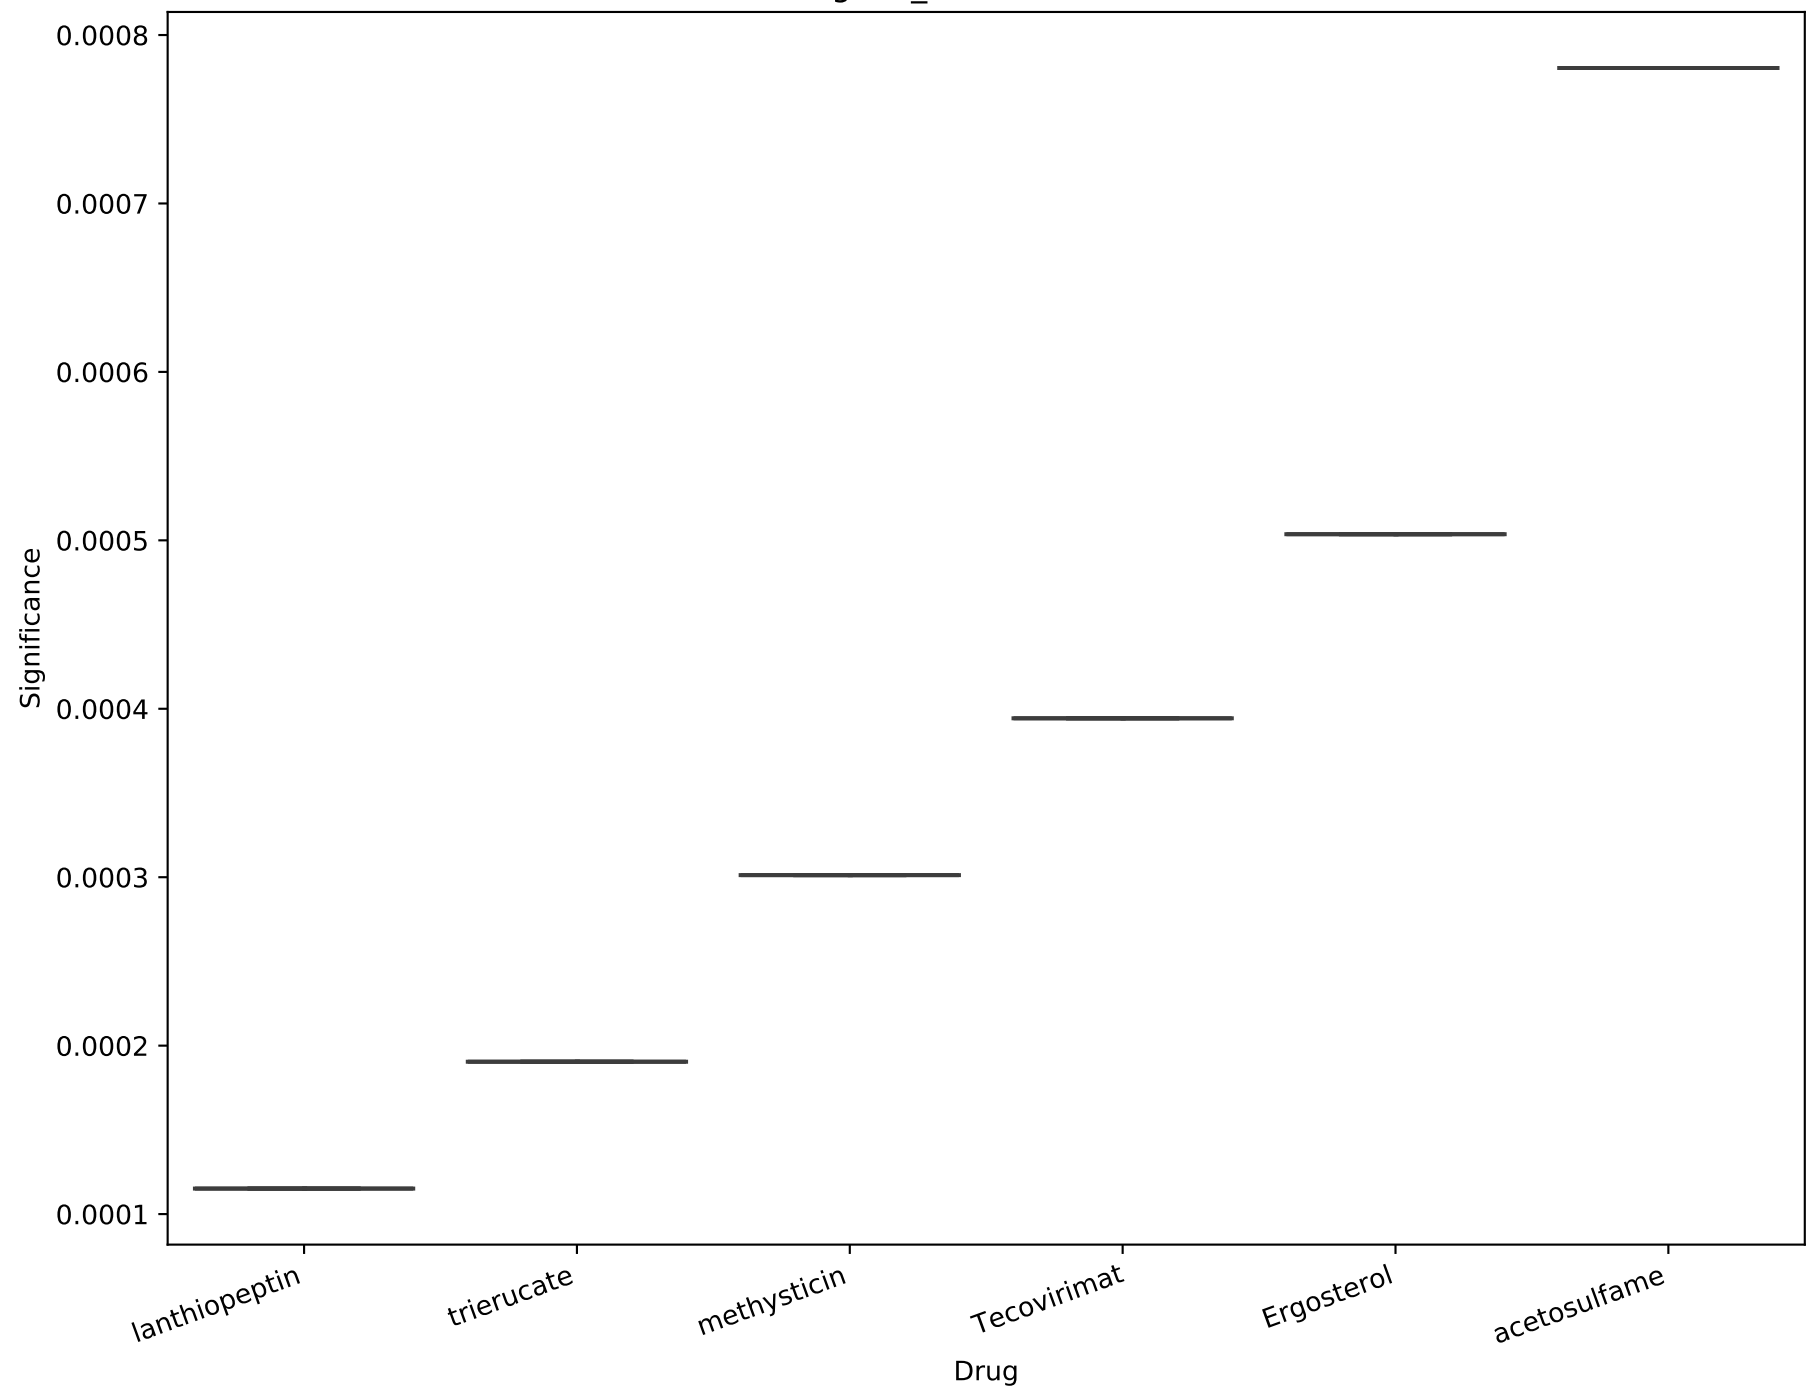

gene\_name: VPS53

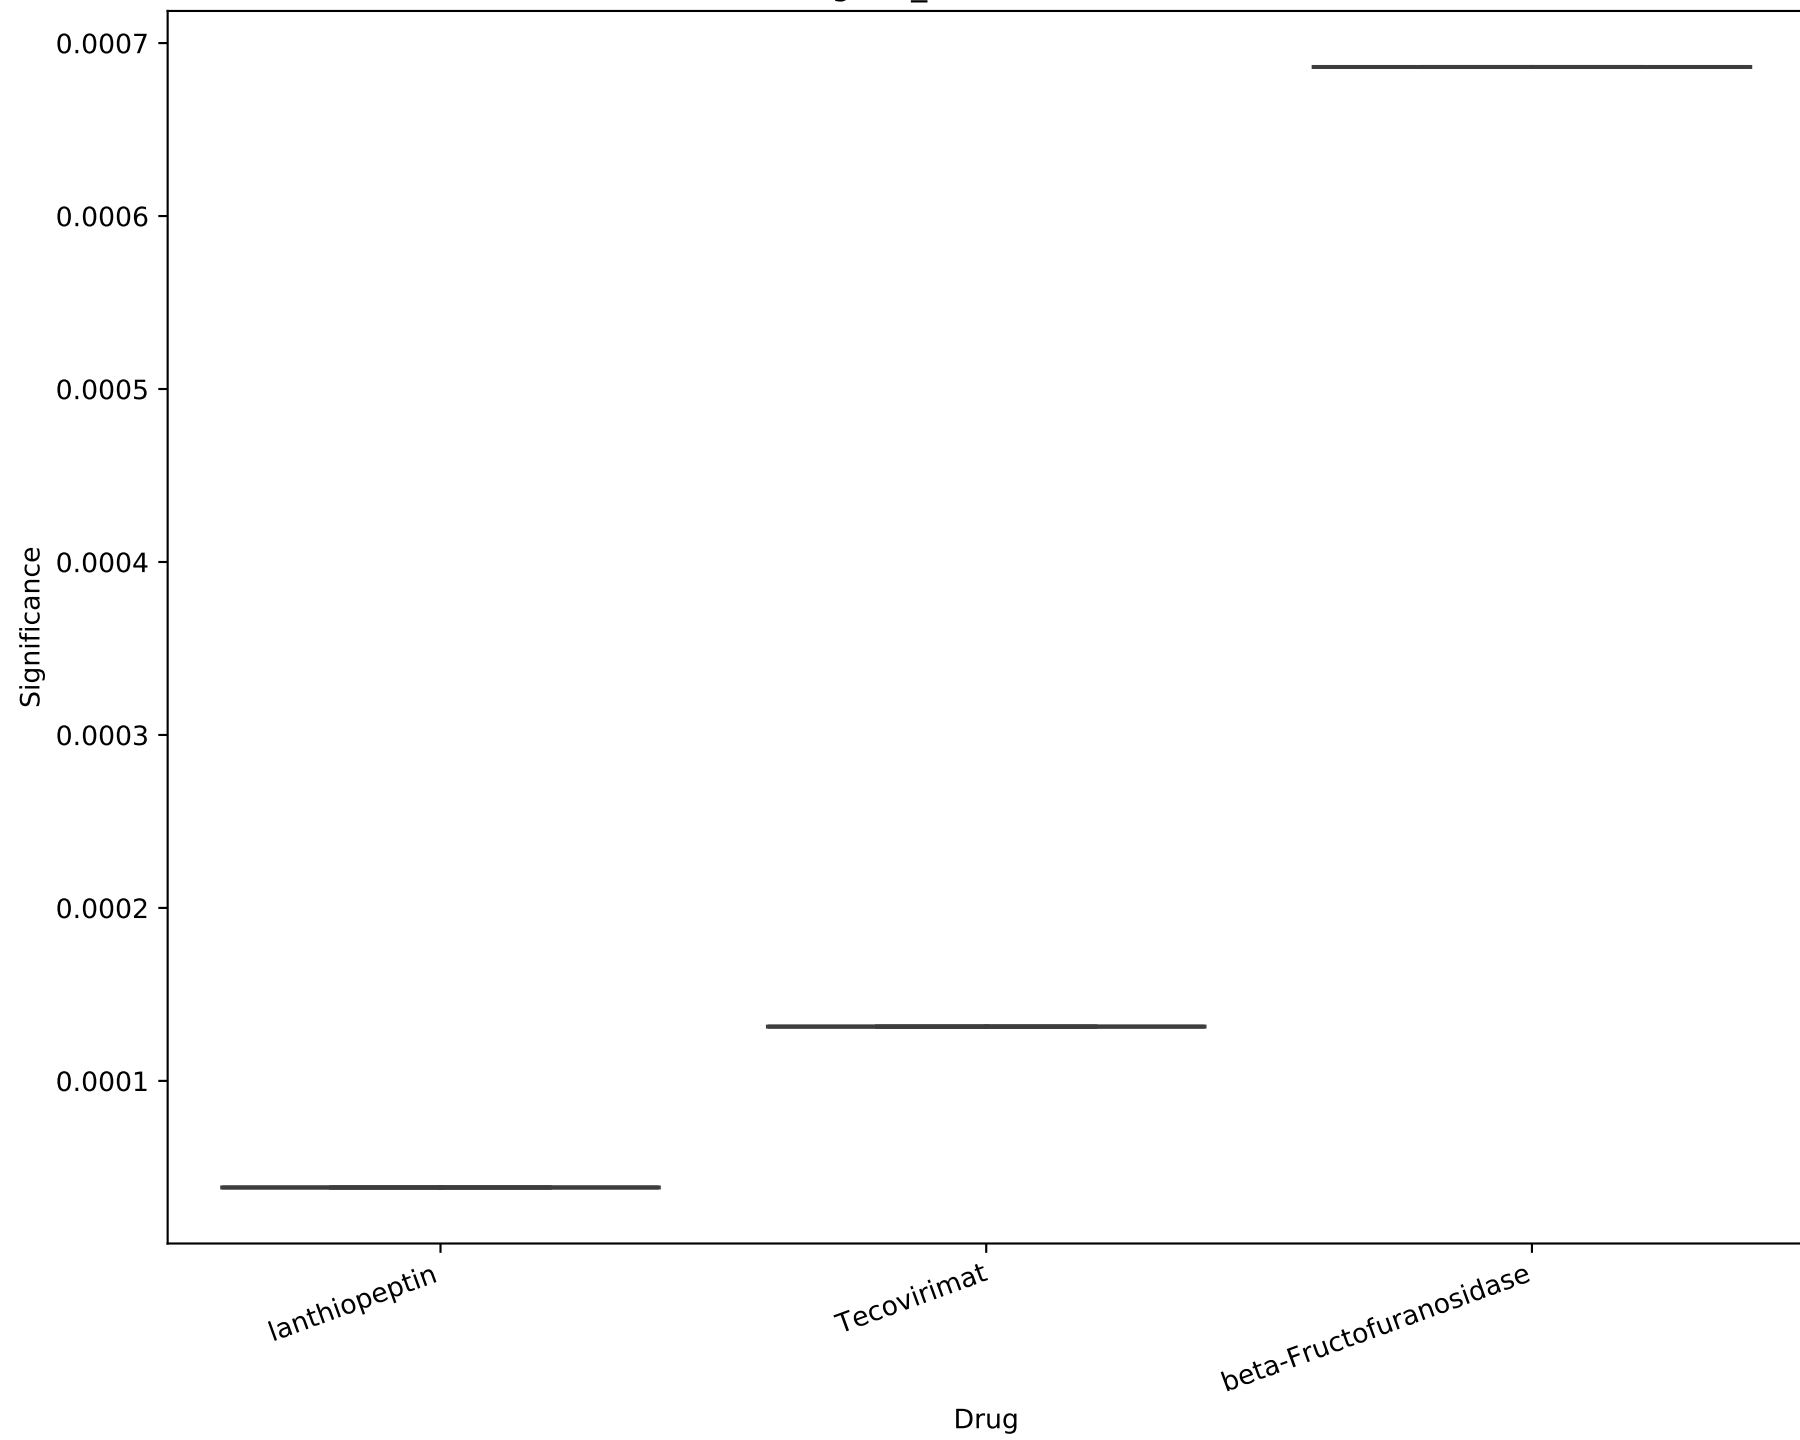

gene\_name: VPS54

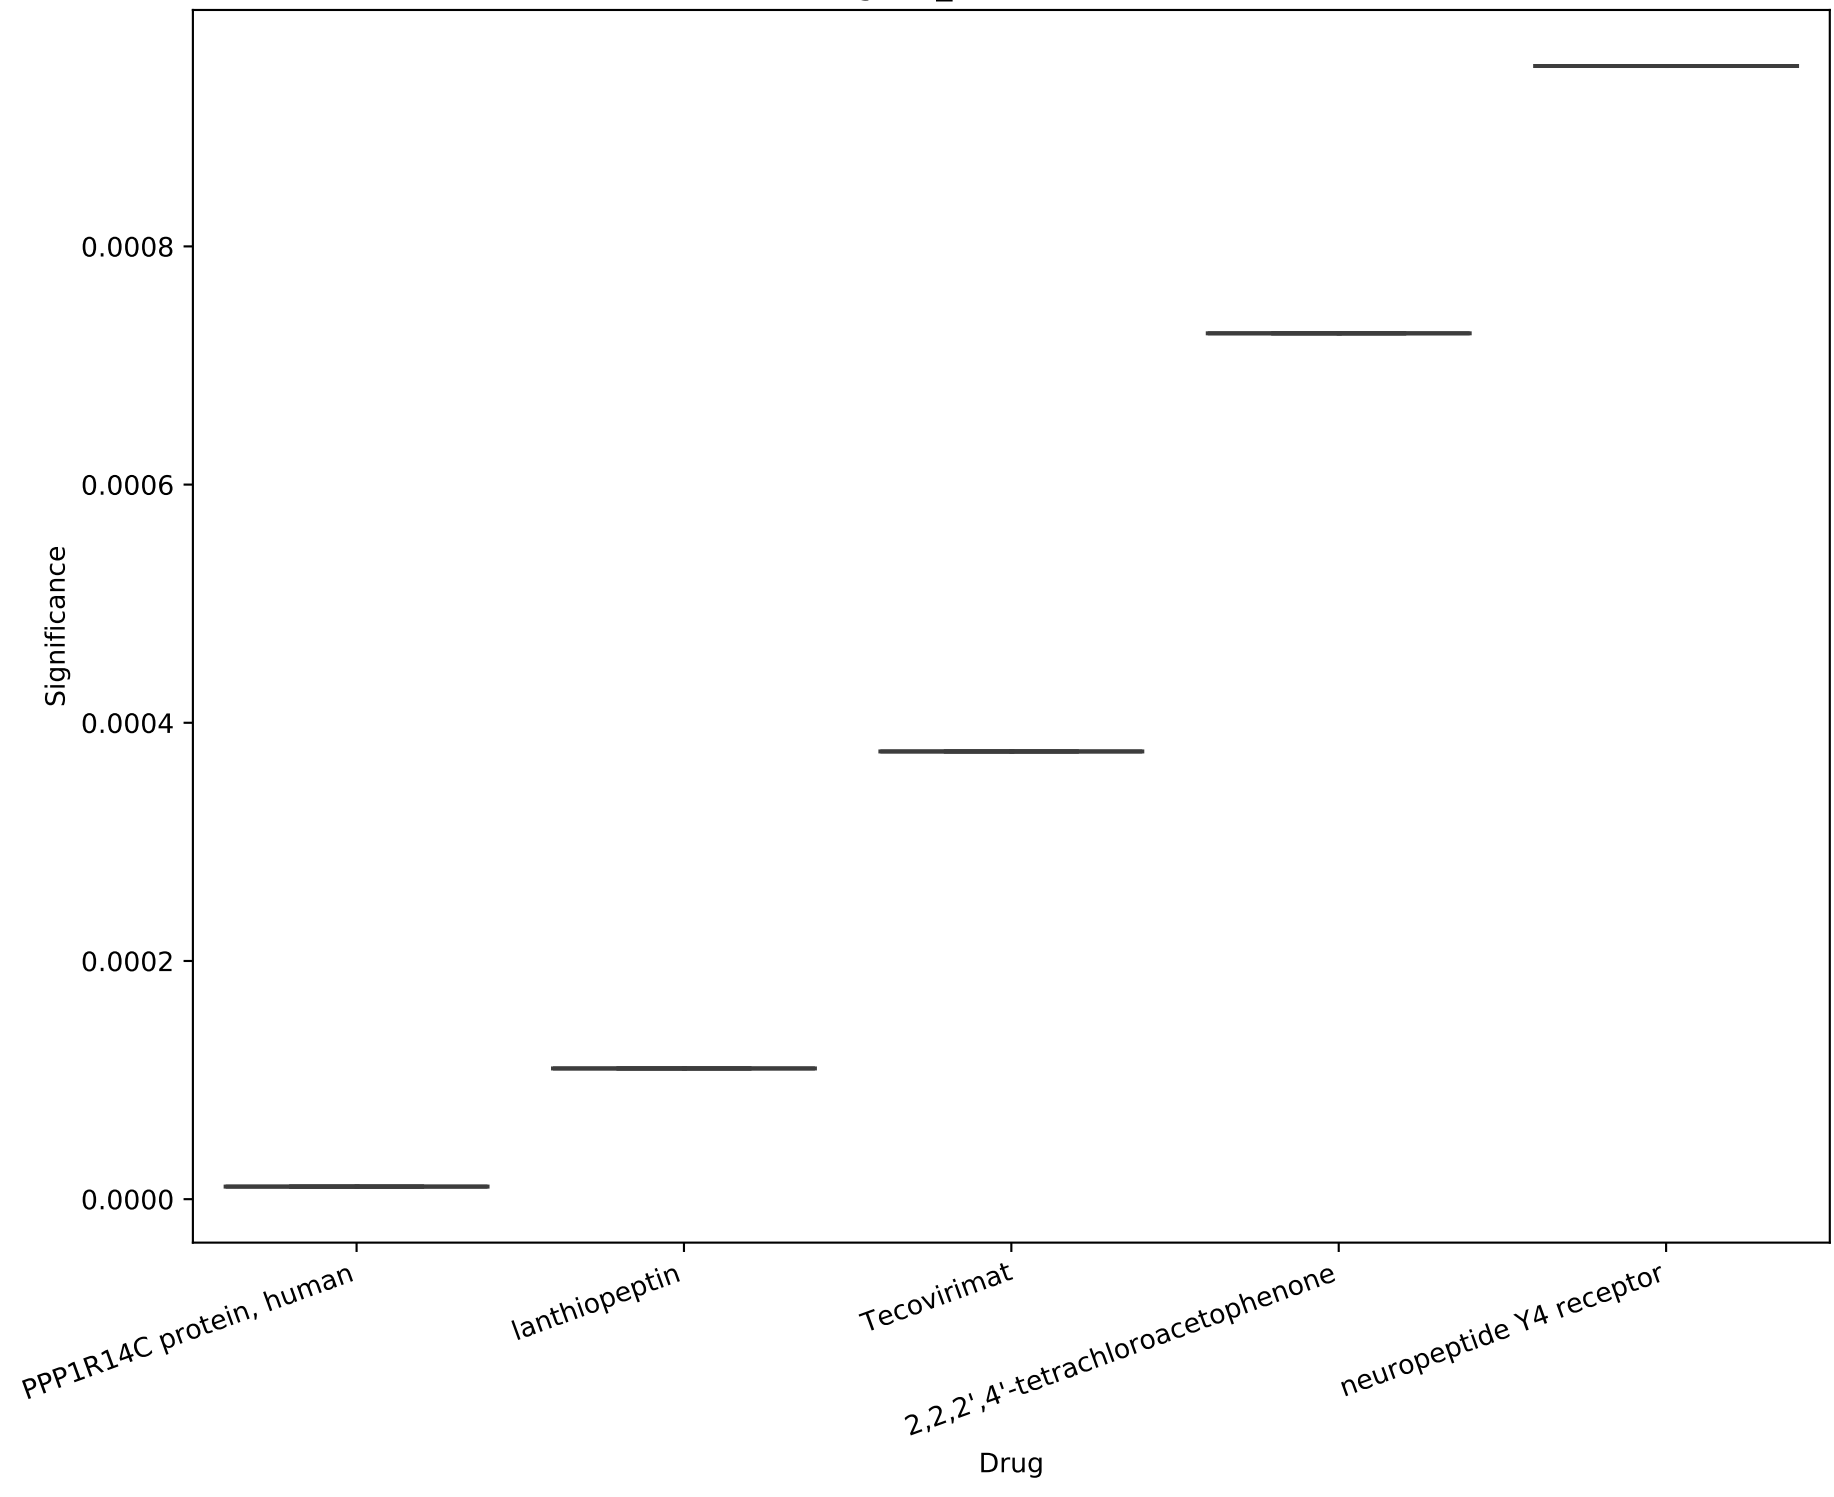

Supplement: Supplementary file [file media-1.zip]
