# Supplementary material for: Drug combinations proposed by machine learning on genes/proteins to improve the efficacy of Tecovirimat in the treatment of Monkeypox: A Systematic Review and Network Meta-analysis
Source: bioRxiv or medRxiv preprint supplement (doi:10.1101/2023.04.23.23289008), 2023-04-25

p-values between associations and target, using different interface features

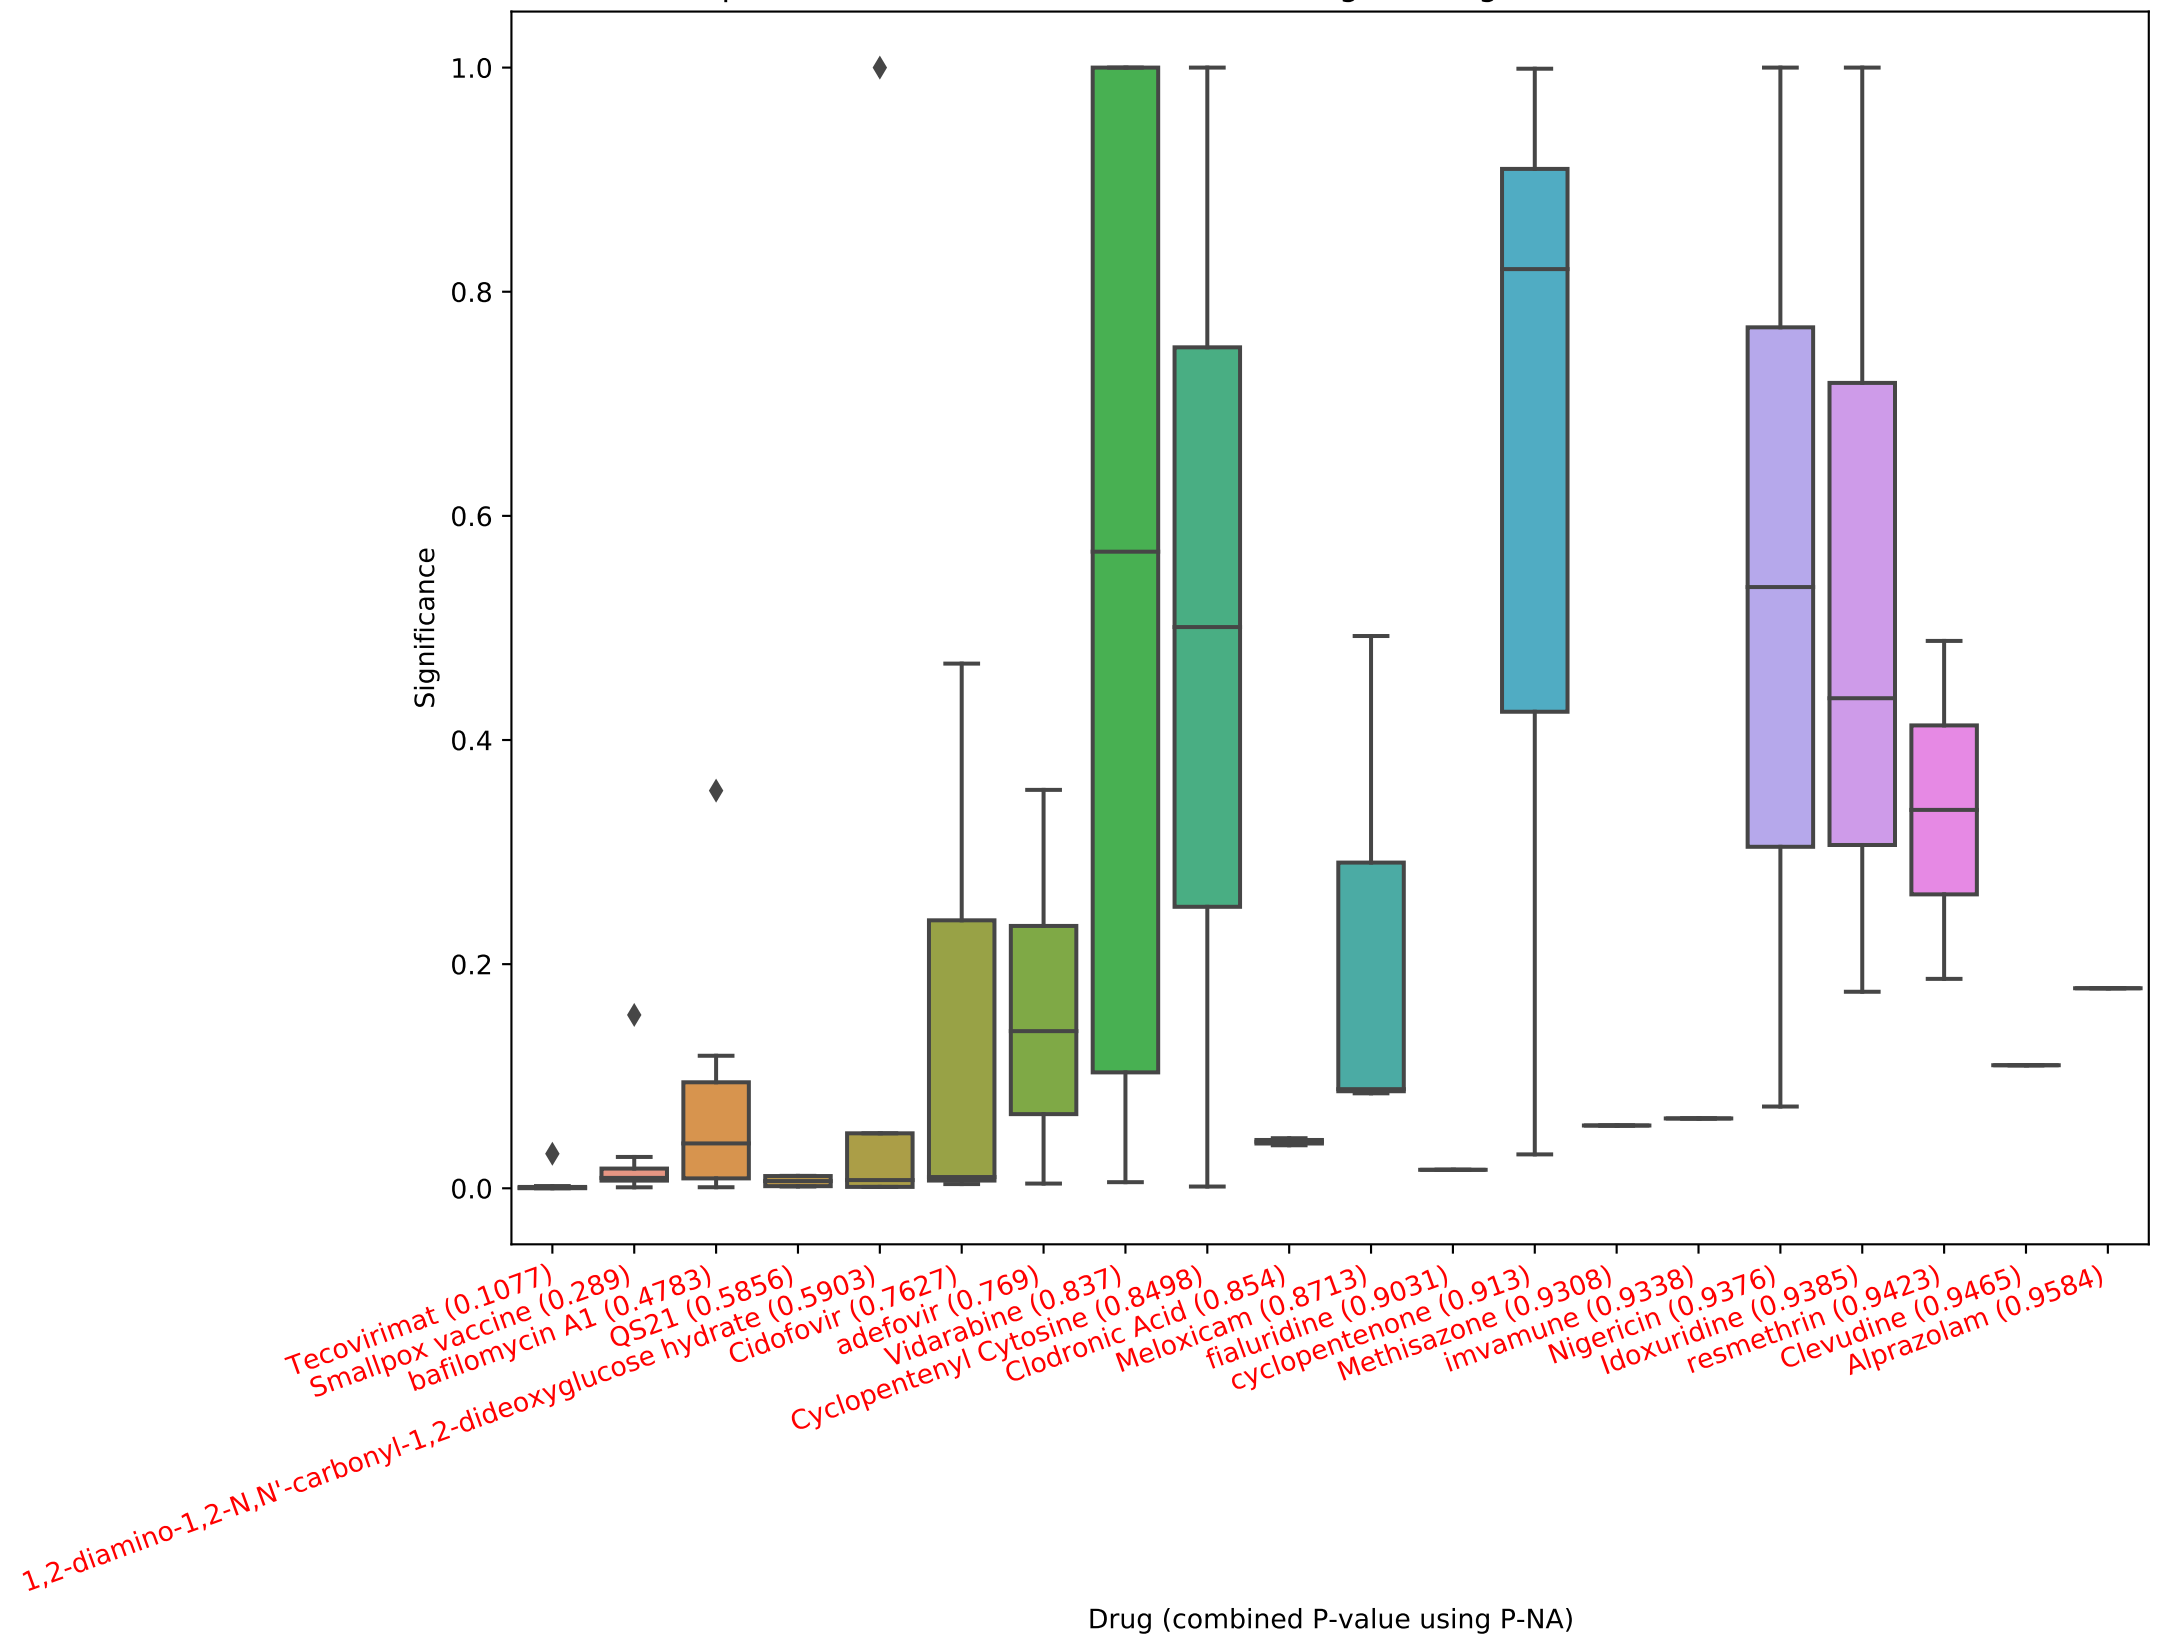

p-values between associations and target, using different interface features

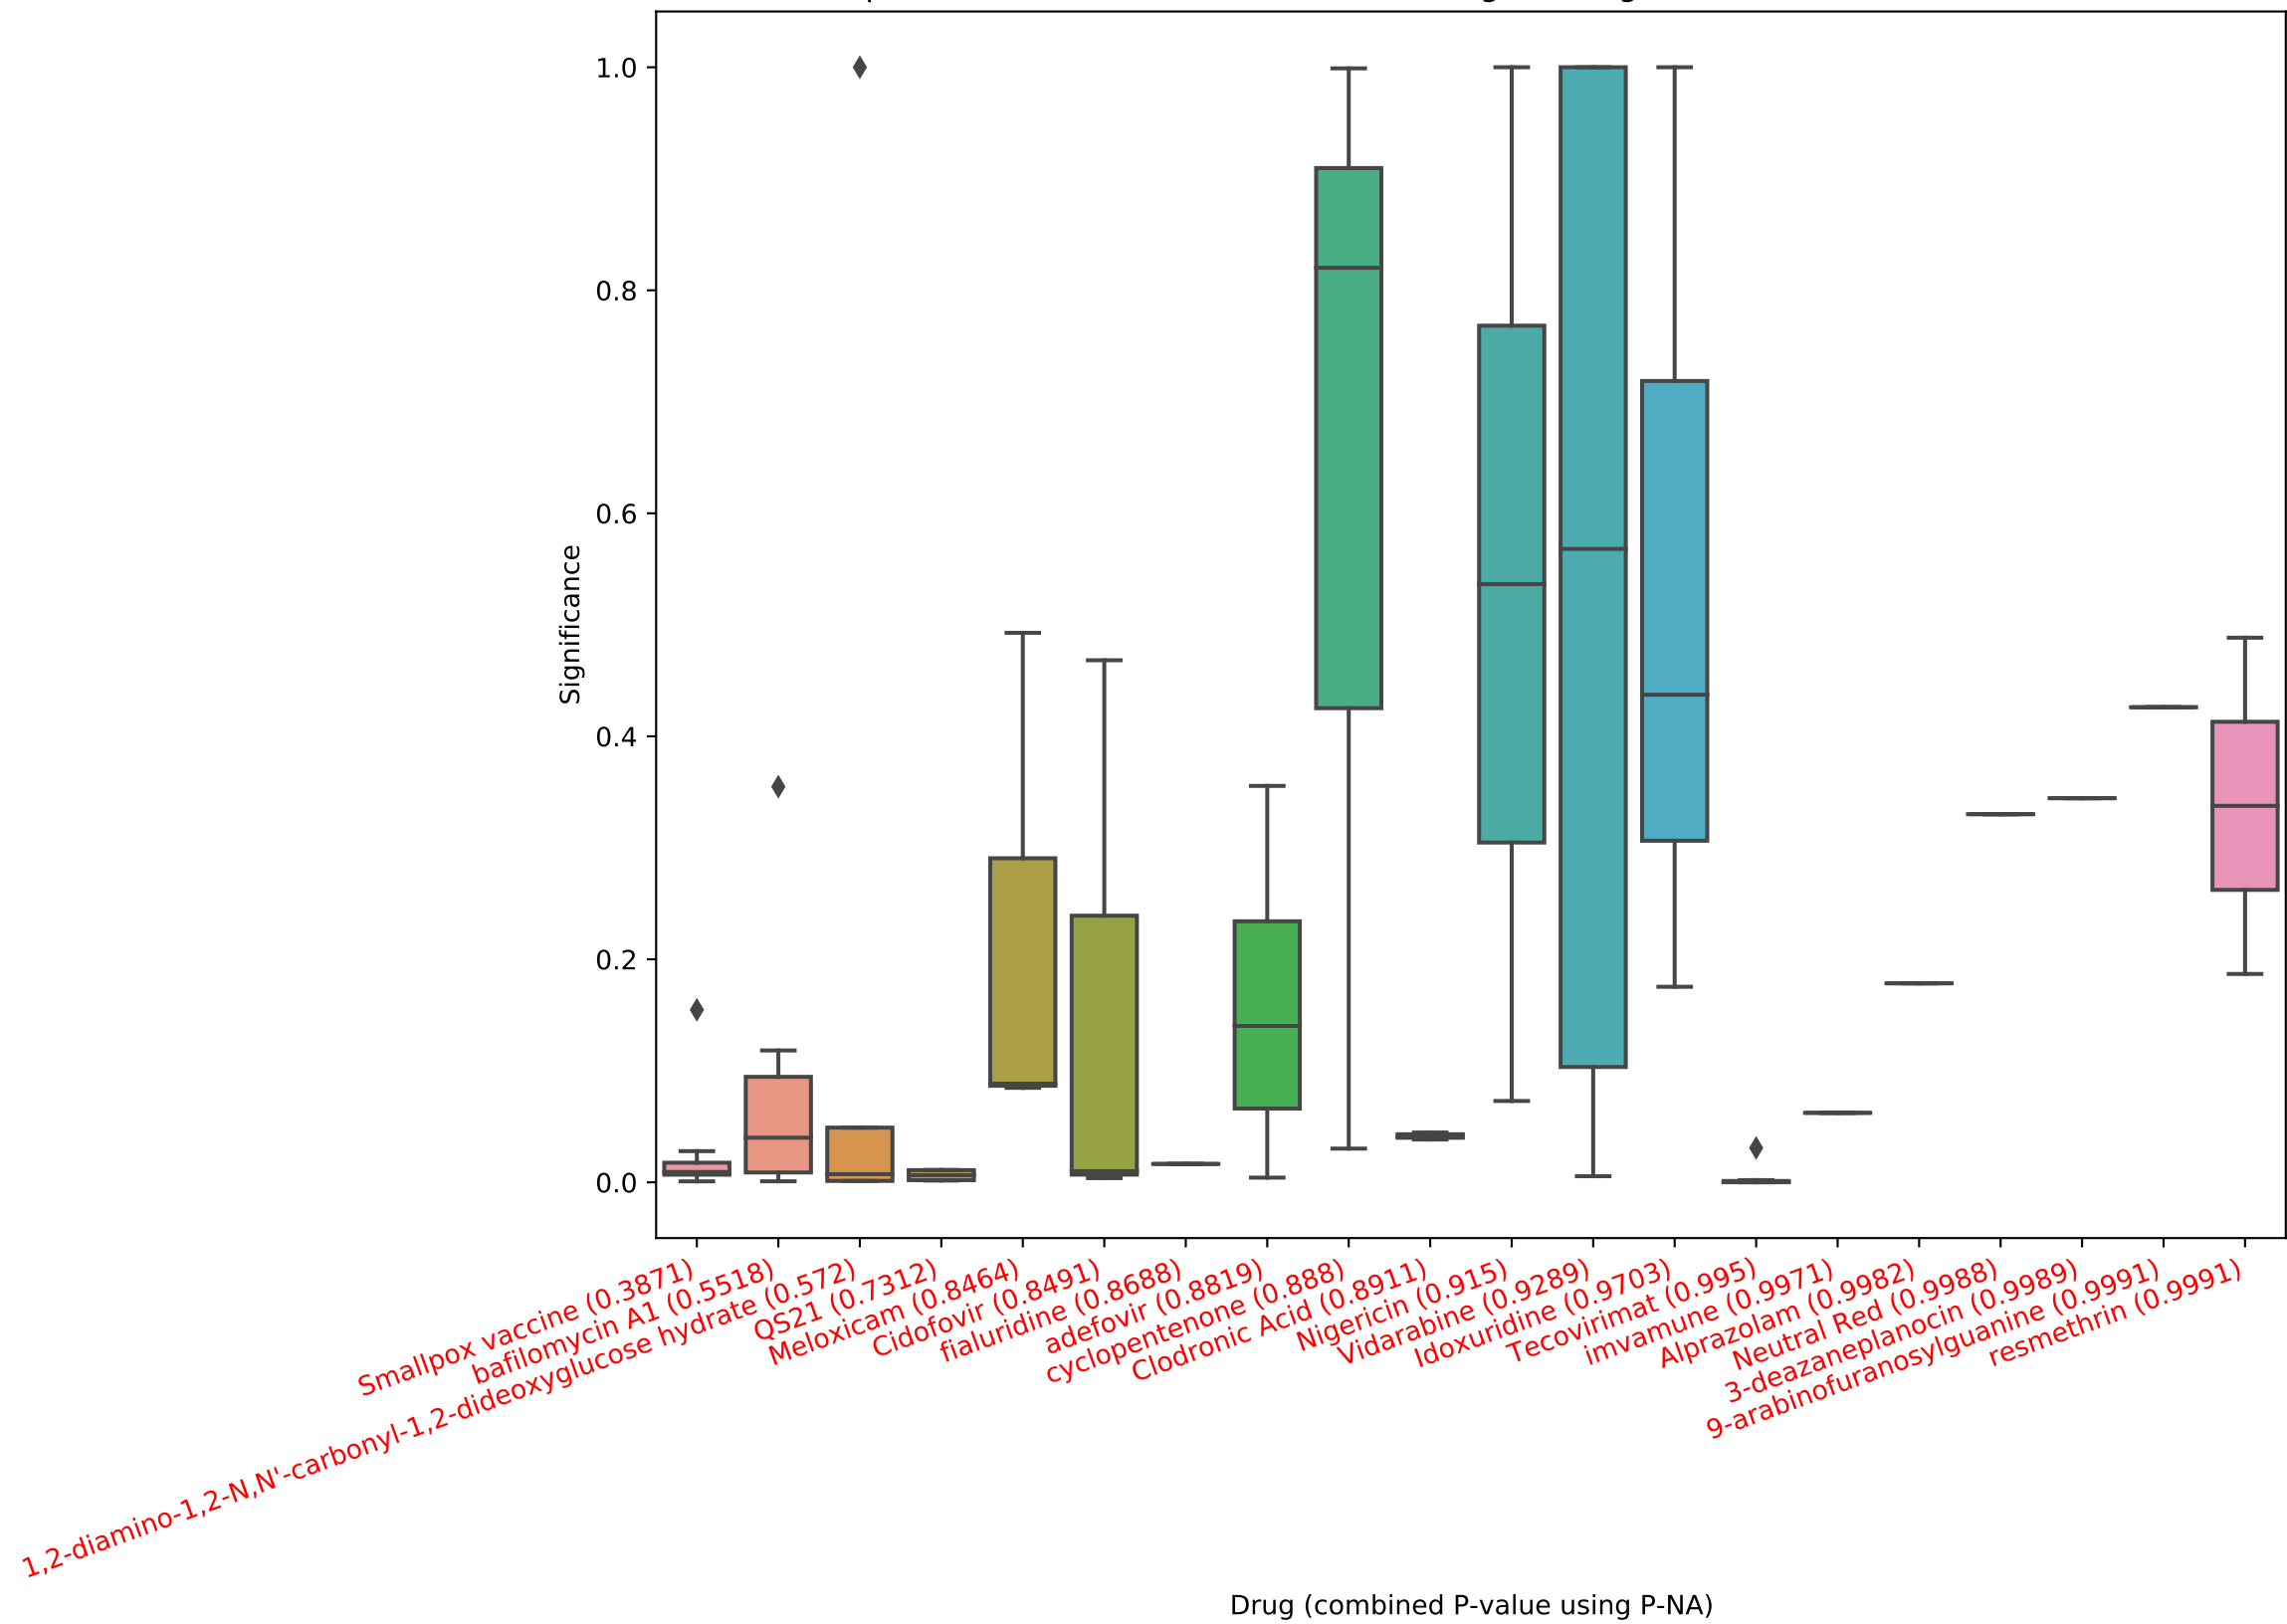

p-values between associations and target, using different interface features

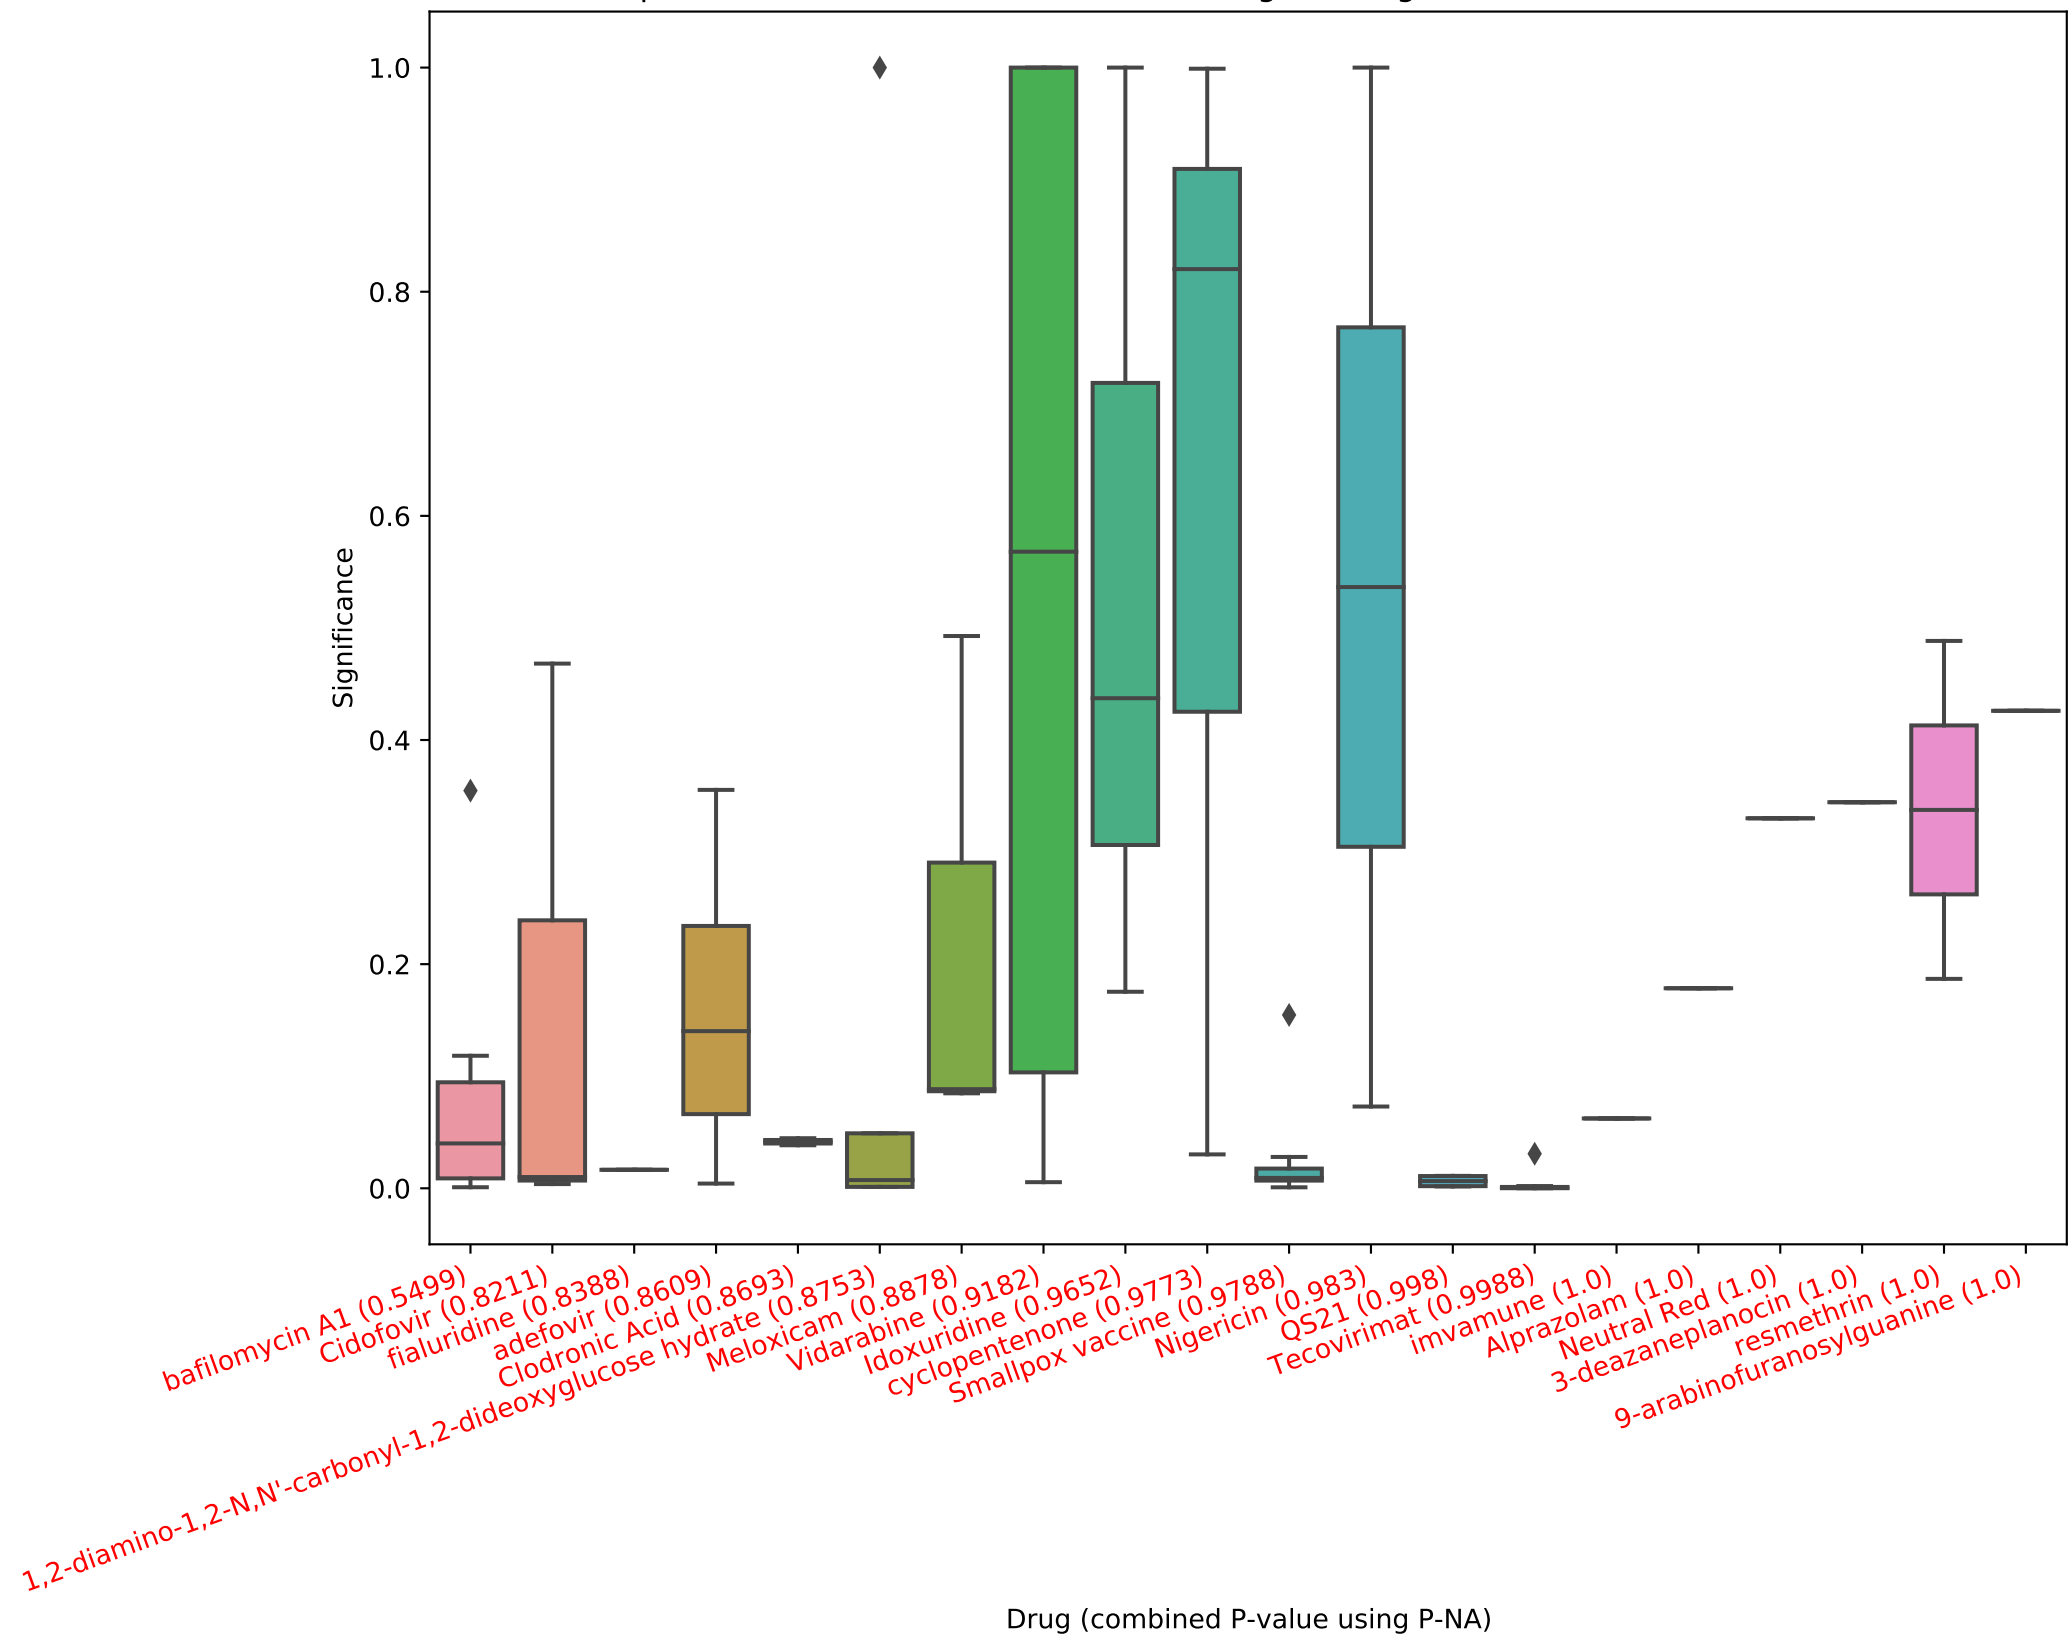

p-values between associations and target, using different interface features

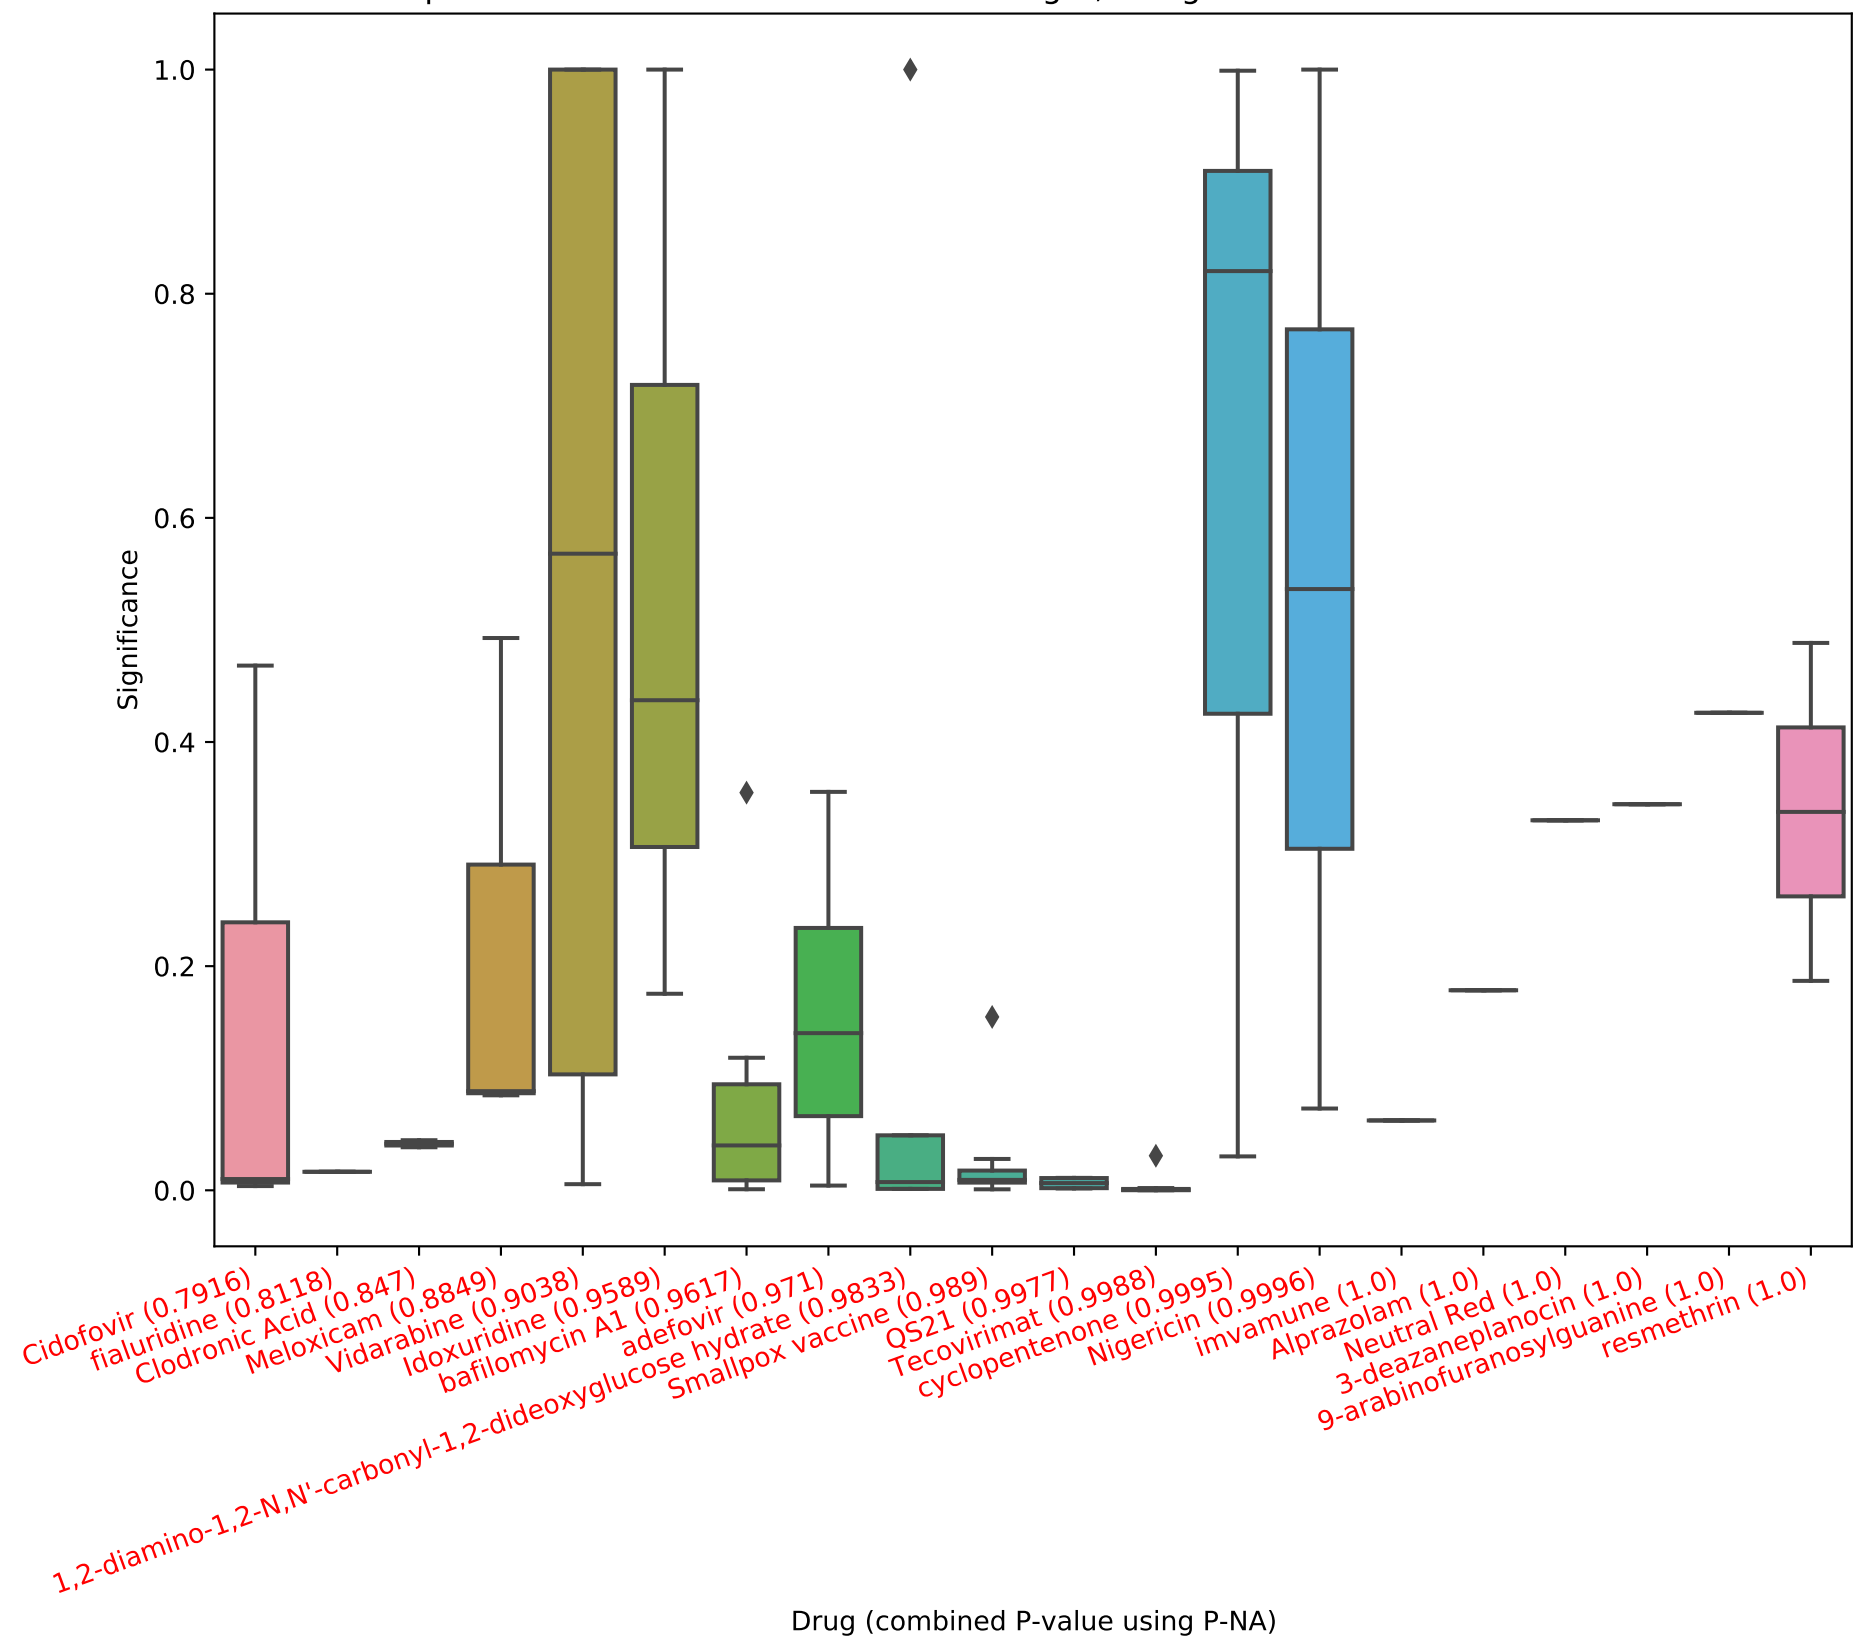

p-values between associations and target, using different interface features

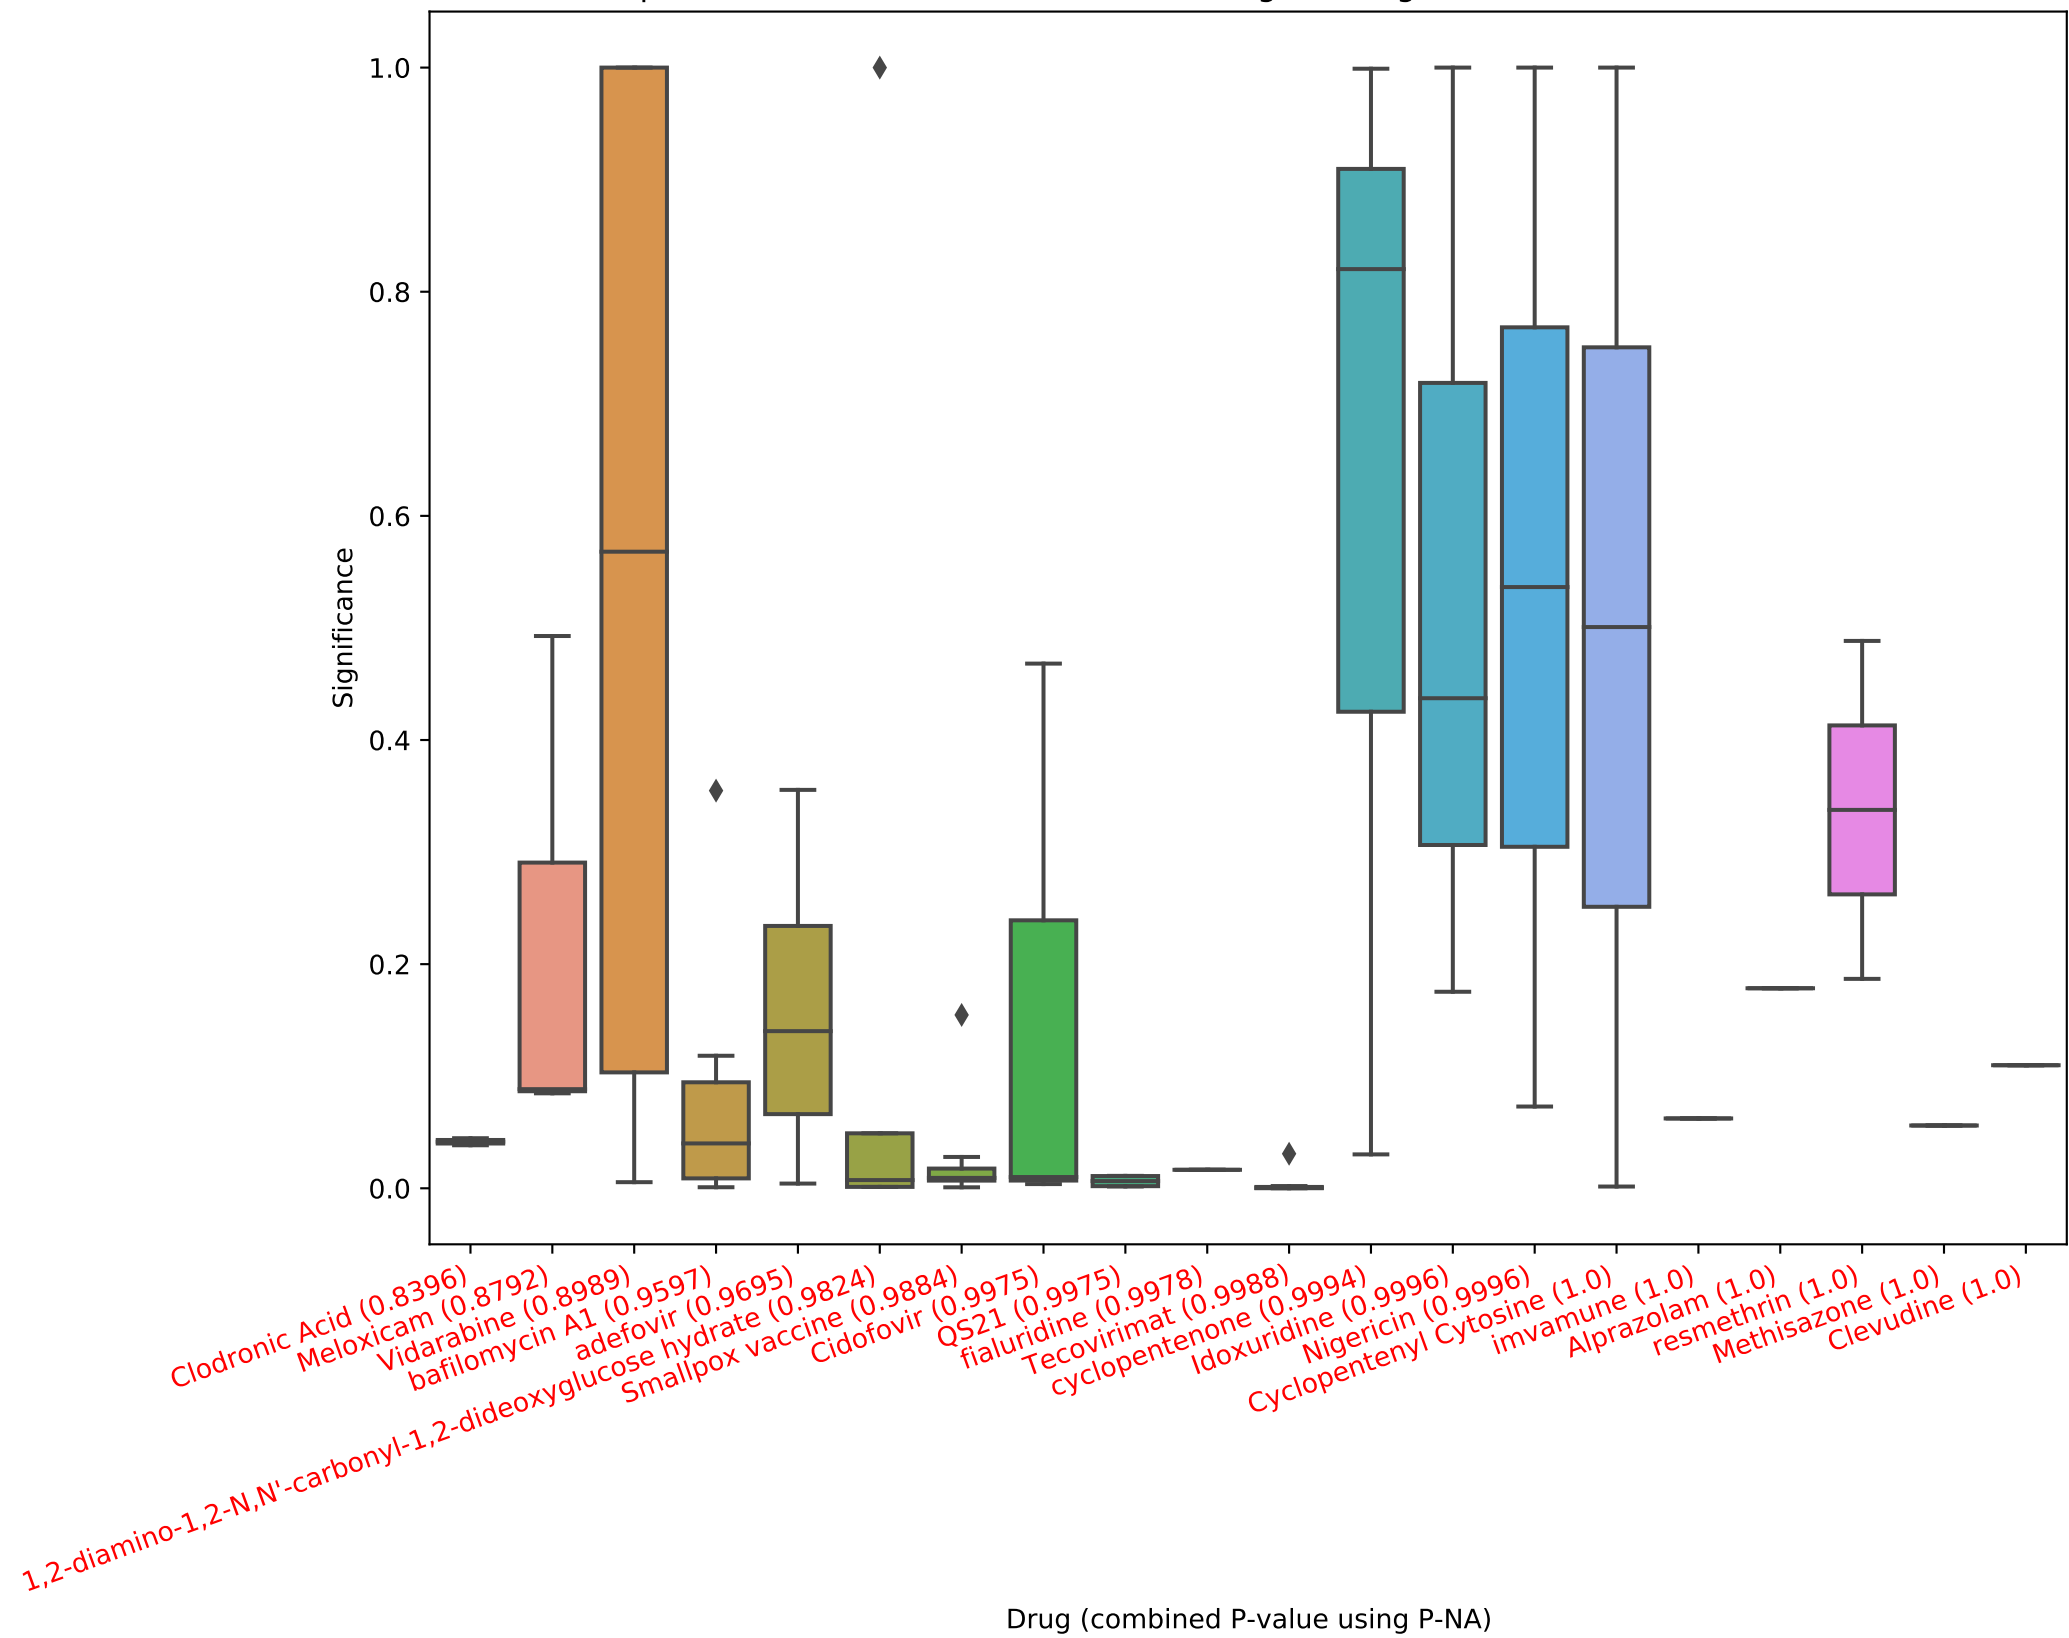

Supplement: Supplementary file [file media-1.zip]
